# Supplementary material for: Fabrication Methods of the Polygonal Masonry of Large Tightly-fitted Stone Blocks with Curved Surface Interfaces in Megalithic Structures of Peru
Source: Preprints.org preprint supplement (doi:10.20944/preprints202108.0087.v8), 2023-03-14
Supplement: Supplementary file 1 [file supplementary]

# Способы изготовления полигональной кладки из крупных плотно подогнанных каменных блоков с криволинейными поверхностями сопряжения в мегалитических комплексах Перу

Р. В. Лапшин

Курчатовский институт

123182, г. Москва, пл. Академика Курчатова, дом 1

эл. почта: [rlapshin@gmail.com](mailto:rlapshin@gmail.com)

В статье предложены способы создания наиболее сложной в исполнении разновидности обнаруженной в Перу полигональной кладки. Данный вид кладки состоит из крупных каменных блоков весом от нескольких сотен килограмм до нескольких тонн, сопрягаемых друг с другом вплотную практически без зазора через сложные криволинейные поверхности по большой площади. В работе даётся описание приёмов, которые, по-видимому, использовали строители, прибывшие из Европы. Обсуждаемые приёмы базируются на применении уменьшенной глиняной модели, 3D-пантографа, транслятора рельефа и реплик. Использование транслятора рельефа, уменьшенной глиняной модели и пантографа обеспечивает не только оригинальный вид и высокое качество кладки из больших блоков, но и позволяет заметно повысить производительность труда строителей. Поскольку механизмы копирования и масштабирования трёхмерных объектов известны с начала 18 века, то и рассматриваемые каменные постройки следует датировать примерно этим временем. Остальные более простые виды полигональной кладки, когда камни небольшие или сопрягаемые поверхности близки к плоскостям, или камни контактируют друг с другом по малой площади, или между камнями имеются значительные зазоры, вполне соответствуют известным способам обработки камня того и более раннего времени, и поэтому не требуют каких-то специальных объяснений. Крепость Саксайуаман рассматривается, как сохранившийся до нашего времени образец ранних крепостей-звёзд. В основе полигональных построек в Перу, полигональных лиц-башен и полигональных барельефов в Камбодже, симметричных статуй фараонов в Египте лежат одни и те же технологии строительства, приёмы работы, инструменты и технические приспособления. Поэтому, с высокой вероятностью можно утверждать, что все эти памятники создавались одной и той же группой архитекторов, скульпторов, строителей, и не могли появиться ранее 17 века.

Материал впервые опубликован 11 апреля 2021 г. в [блоге автора](#).

Ключевые слова: каменный блок, полигональная кладка, глиняная модель, пантограф, транслятор, параллелограммный механизм, реплика, зубило, молоток, мегалит, крепость-звезда, Инки, Куско, Ольянтайтамбо, Мачу-Пикчу, Саксайуаман, Перу, полигональный барельеф, полигональные Лица-башни, Ангкор, Камбоджа, симметричная статуя, статуя фараона, Рамзес, Египет

Copyright © 2021-2023 Р. В. Лапшин, лицензия Creative Commons Attribution

## 1. Введение

Полигональная кладка – это разновидность кладки из природного камня. Камни, изначально имеющие произвольную форму, обрабатываются так, что образуют на лицевой стороне постройки плотно прилегающие друг к другу неправильные многоугольники (полигоны).<sup>1</sup> Отметим, что название “полигональная кладка” – в большой степени условное. Дело в том, что существует множество построек, относимых к полигональным, в которых каменные “многоугольники” помимо прямолинейных содержат криволинейные участки. К особенностям полигональной кладки относится то, что она не требует связующего раствора (сухая кладка). Полигональная кладка обладает достаточной прочностью и устойчивостью, чтобы выдерживать землетрясения средней силы.<sup>2,3,4,5</sup>

В настоящей работе рассматриваются полигональные кладки в мегалитических постройках, расположенных на территории современного Перу. Основное внимание уделено кладкам, которые состоят из крупных каменных блоков весом от нескольких сотен килограмм до нескольких тонн, сопряжённых друг с другом практически без зазора через кри-

волинейные поверхности большой площади. Остальные более простые виды полигональной кладки, когда камни небольшие<sup>6</sup> или сопрягаемые поверхности близки к плоскостям,<sup>6,7</sup> или камни контактируют друг с другом по малой площади,<sup>7</sup> или между камнями имеются значительные зазоры, вполне соответствуют давно известным способам обработки камня и поэтому никакого специального объяснения не требуют.

Основной строительный материал тех лет – это глыбы и блоки скальной породы случайной (произвольной) формы. Как правило, данный строительный материал не нужно было добывать (выламывать в карьерах), поскольку он был представлен повсюду в виде многометровых отложений горных обломков, образованных у подножия гор в результате обвалов и оползней. В большинстве случаев этот материал не нужно было даже ниоткуда транспортировать, так как строили обычно в тех местах, где материал уже имелся в большом достатке. Если мегалитическое сооружение располагалось на вершине горы, то и в этом случае материал для строительства брался (выламывался) здесь же на месте. Именно поэтому, например, верхушка горы, где расположен комплекс построек Мачу-Пикчу, срезана, тогда как верхушки соседних гор, где никто не живёт, острые.

В целом полигональная кладка ни есть что-то небывалое, такая кладка применялась в Европе с античных времён.<sup>5,8</sup> В перуанском варианте поражает только качество выполненных криволинейных стыков, которое даже в наше время повторить непросто.<sup>9</sup> Предлагаемые как со стороны научного и инженерного сообщества,<sup>6,9,10,11,12,13</sup> так и со стороны энтузиастов<sup>14,15,16,17</sup> способы изготовления перуанской полигональной кладки не объясняют всех наблюдаемых её особенностей и часто далеки от реальности.

Предлагаемые автором способы изготовления полигональной кладки базируются на применении уменьшенной глиняной модели и 3D-пантографа<sup>18</sup> (см. разделы 2.1, 2.6-2.10), транслятора рельефа (см. раздел 2.11) и реплик<sup>10</sup> (см. разделы 2.3, 2.6). Основным инструментом обработки камня выступает молоток и стальное зубило (на практике – набор зубил разных видов из закалённой стали). Использование транслятора рельефа, уменьшенной глиняной модели и пантографа обеспечивает не только известный оригинальный вид и высокое качество кладки из больших блоков, но и позволяет заметно повысить производительность труда строителей. Только благодаря высокой производительности было возможно реализовать имеющиеся в Перу объёмы полигонального строительства за приемлемое время, привлекая разумное количество рабочей силы.

Если внимательно присмотреться к форме камней в кладке, к местам их практически идеального сопряжения, то возникает ощущение того, что камни не обрабатывались механически, а были вылеплены. В связи с этим, многие исследователи ошибочно решили, что камни вылепливались или отливались из некой пластичной массы – искусственного гранита, бетона, геоплимерного бетона, извести, размягчённой нагревом горной породы и прочее.<sup>14-17</sup> В этой связи сразу возникает вопрос: Зачем производить недешёвую пластичную массу, если вокруг полно уже готового к употреблению материала – природного камня произвольной формы? Ну и совсем непонятно: Зачем пластичной массе придавать такие сложные формы? Почему бы, например, не сделать ограниченный по номенклатуре набор стандартных бетонных блоков, имеющих замковые элементы? Тем не менее, лепка в процессе полигонального строительства действительно имела место, но только это была лепка из глины уменьшенной модели будущего каменного блока, а не лепка самого блока из камня. Далее “лепнина” с помощью молотка и зубила просто переносилась с использованием 3D-пантографа на каменный блок с заданным в пантографе увеличением.

Есть и другие доводы против пластичной версии. Например, тыльная сторона многих блоков представляет собой рваный камень; отсутствуют затекания пластичной массы в межблоковые пространства внутри кладки; на каменных блоках имеются прожилки и другие особенности присущие натуральному камню.<sup>19</sup> В отличие от глины бетон,<sup>14</sup> известь, искусственный гранит не годятся для ручной лепки. Поэтому блоки, отливаемые из этих материалов, будут иметь плоские поверхности сопряжения, а также плоские лицевые и

тыльные стороны, определяемые плоскими щитами используемой опалубки. Таким образом, если в кладке, например, присутствуют плавные L- или U-образные выемки, то, скорее всего, данная кладка не была изготовлена общепринятым в строительстве способом литья (см. дополнительно раздел 2.2).

Любые изделия, полученные литьём/“лепьём”<sup>17</sup>, в процессе сушки претерпевают усадку. Усадка современного бетона может достигать 3%, усадка извести заметно больше. Усадка отливки ведёт к уменьшению её размеров, короблению (изменению формы) и, как следствие, к растрескиванию. Таким образом, наличие трещин может являться одним из признаков литья. Вызванное усадкой уменьшение размеров отливки, в свою очередь, приводит к появлению зазоров между блоками. Поскольку исходная форма блоков в полигональной кладке неправильная, то усадка оказывается ещё и неравномерной. Соответственно, неравномерными (непараллельными, см. ссылку 15) будут и зазоры, возникающие вследствие такой усадки.

Таким образом, даже если отливать блоки последовательно друг за другом “по месту”,<sup>14,15</sup> дожидаясь каждый раз окончания усадки (идеальный случай), то всё равно полностью исключить зазоры между блоками не получится. Для бетонного блока без арматуры со скромными размерами 50×50 см (ширина×высота) при типичном среднем коэффициенте усадки современного бетона 1.5%, зазор между блоками составит 7.5 мм (!). Чем больше размеры блоков, тем больше величина их усадки, и, соответственно, тем будет больше возникающий зазор.

Примерный вид полученной литьём полигональной кладки из больших плотно примыкающих друг к другу блоков показан на Рис. 1. Вначале отливаются большие блоки. После окончания усадки из больших блоков последовательно, блок за блоком собирается полигональная кладка (порядок установки блоков показан на рисунке цифрами). Каждый блок устанавливается так, чтобы он примыкал вплотную определённой стороной к смежному ранее установленному блоку. На заключительном этапе бетоном заполняются небольшие (компенсационные) пространства между большими блоками (перед заливкой на затвердевший бетон наносится тонкий слой материала, препятствующий сцеплению свежего бетона с затвердевшим<sup>14,15</sup>). Заметим, что полигональная кладка, полученная согласно описанной технологии, в некоторых случаях может оказаться не полностью разборной.

Из представленной процедуры видно, что поверхности сопряжения в полученных литьём полигональных кладках должны быть близки к плоскостям, а сами кладки должны иметь весьма специфический внешний вид (см. Рис. 1). Большие некраевые блоки в таких кладках находятся в контакте с соседними большими блоками только двумя своими сторонами, контакты остальных сторон происходят через небольшие блоки с малой собственной усадкой. Небольшие блоки призваны компенсировать связанные с усадкой уменьшения размеров и изменения формы больших блоков. Только при таком подходе возможно уменьшить до минимума (но не до нуля) зазоры между полученными литьём бетонными блоками.

Чем больше сторон у большого бетонного блока, тем больше требуется компенсационных вставок, тем, соответственно, сложнее становится используемая опалубка. Так как треугольных блоков в перуанских полигональных кладках нет, то наиболее простой формой блока будет в этом случае условный четырёхугольник. Условный четырёхугольник возникает, если игнорировать изменения формы большого многоугольного блока, связанные с включением в его тело компенсационных блоков. Поскольку кладок подобных изображённой на Рис. 1 в Перу не обнаружено, значит, для изготовления полигональных стен из крупных плотно примыкающих друг к другу блоков методы литья в опалубку не применялись.

Помимо механической обработки камней посредством молотка и стального зубила в статье также предложен способ, позволяющий отливать крупные полигональные блоки в

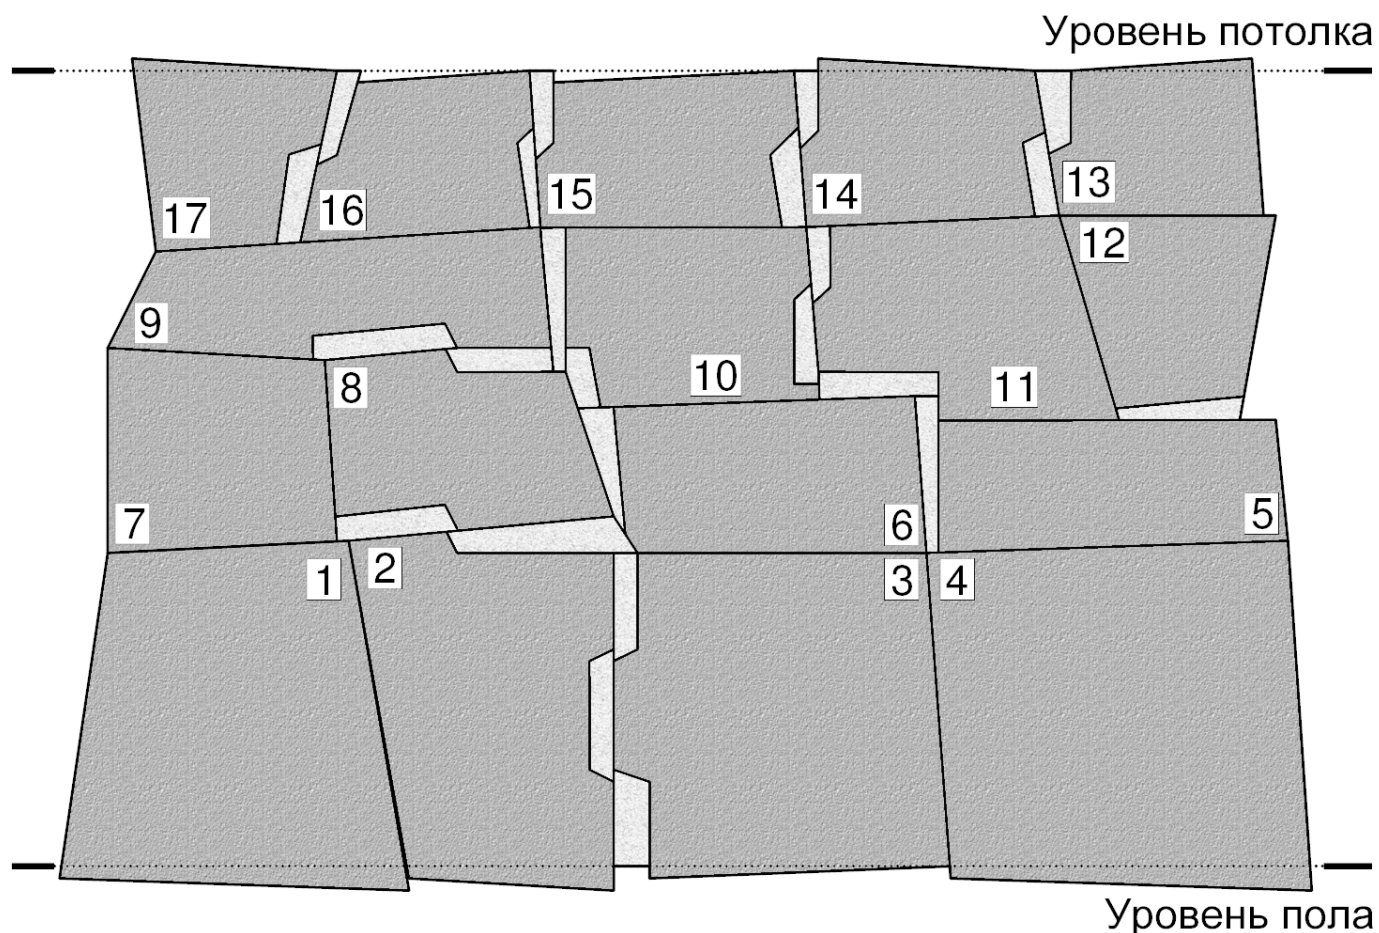

Рис. 1. Вероятный вид полученной литьем полигональной кладки из больших плотно прилегающих друг к другу блоков. Небольшие блоки, отливаемые на завершающем этапе, предназначены для выборки межблочных зазоров, возникающих из-за усадки бетона в больших блоках. Сопряжения между большими блоками лишь изображены прямолинейными с нулевыми зазорами, в реальности из-за неравномерной усадки эти сопряжения являются криволинейными и всегда имеют непостоянные зазоры. Зазоры тем больше, чем больше коэффициент усадки и размеры блока. Отклонения блоков от границ уровней пола и потолка вследствие усадки преувеличены для большей наглядности. Цифрами показан порядок установки больших блоков.

форму (см. раздел 2.2). Плотное примыкание блоков полигональной кладки в этом случае достигается благодаря высокой точности литья (малой усадке). Характерными признаками литья по такой технологии являются: сплошная/полая болванка из дешёвого бетоноподобного материала и сравнительно тонкая оболочка из более дорого искусственного гранита.

К моменту завоевания Южной Америки европейцами индейцы не знали ни железных орудий, ни колеса, ни гончарного круга, не имели тягловых животных, не владели технологией обжига кирпича, не обладали письменностью. Перу – горная страна, а в горной стране большие объёмы сельскохозяйственной продукции получить невозможно просто потому, что очень мало пригодных для ведения сельского хозяйства посевных площадей (острый дефицит земли сельхозназначения, собственно, и стал причиной масштабного строительства террас<sup>20</sup> на склонах гор, в особенности, в тот момент истории Перу, когда прибывшие Европейцы развернули в стране крупномасштабную добычу золота и серебра). Без развитого сельского хозяйства, город (цивилизация) возникнуть не может. Развитое сельское хозяйство подразумевает производство продуктов питания в товарных количествах.

На себе можно вспахать огород, с которого будет кормиться одна семья крестьянина. Чтобы прокормить несколько семей горожан, крестьянину нужно использовать сельхоз-



машины тех лет – лошадей или волов, а также сельхозорудия к этим “машинам”. Чтобы доставить в город продукты питания и сырьё ремесленникам, требуются транспортные средства тех лет – повозки, запряжённые лошадьми или волами, на худой конец мулы, а также дороги. Сельскохозяйственным и транспортным машинам тех лет – лошадям для работы необходимо топливо, много топлива. Поэтому часть дефицитной земли придётся отвести под выпас и под выращивание фуражного зерна.

Так как города в Перу по указанным выше причинам самозародиться не могли, то и империя в Перу возникнуть не могла. Империя Инков – это выдумка, миф, её никогда не существовало. Первые города в Перу появляются только с приходом туда европейских переселенцев. Переселенцы привезли с собой железные орудия труда, колёсные транспортные средства, лошадей, зерновые культуры, современные для того времени оружие, сельскохозяйственные и ремесленные технологии, письменность; внедрились деньги и товарно-денежные отношения, построили дороги и мосты.<sup>21,22</sup>

Принимая в расчёт сказанное, следует вывод о том, что рассматриваемые в статье полигональные постройки могли быть возведены только строителями, прибывшими из Европы (см. разделы 3.5, 3.6). В отличие от индейцев строители эти обладали всеми необходимыми инструментами, механизмами и навыками масштабного строительства. Следы этого масштабного строительства из камня видны повсюду – католические соборы, монастыри, дворцы, виллы, масса городских и промышленных построек, мосты, дороги.<sup>23</sup> В частности, известная крепость Саксайуаман представляет собой сохранившийся до нашего времени образец ранних крепостей-звёзд (см. раздел 3.6).

Всякое масштабное строительство всегда подразумевает наличие соответствующей этому масштабу экономики. Поэтому в статье дополнительно объяснено, на чём базировалась экономика Перу тех лет (см. раздел 3.5). Поскольку механизмы копирования и масштабирования трёхмерных объектов известны в Европе с начала 18 века (см. раздел 3.4), то и рассматриваемые полигональные постройки следует датировать примерно этим временем.

В разделе 3.8 показано, что некоторые “древнеегипетские” статуи фараонов могли быть изготовлены по технологии литья, изложенной в разделе 2.2. В разделе 3.8 также объясняется, как с помощью небольшой модификации конструкции 3D-пантографа можно изготовить “древнеегипетские” статуи фараонов, левая и правая половины которых обладают достаточно высокой степенью зеркальной симметрии.

## **2. Инструменты, приспособления и способы изготовления полигональной кладки**

### **2.1. Перенос формы глиняной модели на каменную заготовку с помощью 3D-пантографа**

На первом этапе, в соответствии с эскизом в уменьшенном масштабе изготавливается глиняная модель постройки, блоки которой образуют полигональную кладку. Пусть для определённости постройкой является просто стена. Из глины вылепливаются небольшие полигональные блоки задуманной формы. Размеры этих блоков соответствуют размерам, скажем, баскетбольного мяча или около того. Места сопряжения поверхностей формируются вдавливанием блоков друг в друга. Для уменьшения усадки внутрь глиняных блоков закладывается твёрдая сердцевина подходящей формы – камень или кусок сухой глины.

Из сырых модельных блоков собирается модель стены. В ходе сборки между блоками прокладывается материал, препятствующий слипанию блоков в процессе сушки-затвердевания. Чтобы уменьшить влияние усадки, вначале сушится нижний ряд, затем следующий за ним и т. д. При необходимости стене придаётся требуемый наклон (см. раздел 2.6). В процессе сушки-усадки модельные блоки досопрягаются более точно под собственным весом и с небольшими правками строителя. Если в результате усадки между модельными блоками возникает зазор, то этот зазор устраняется нанесением слоёв глины подходящей толщины.

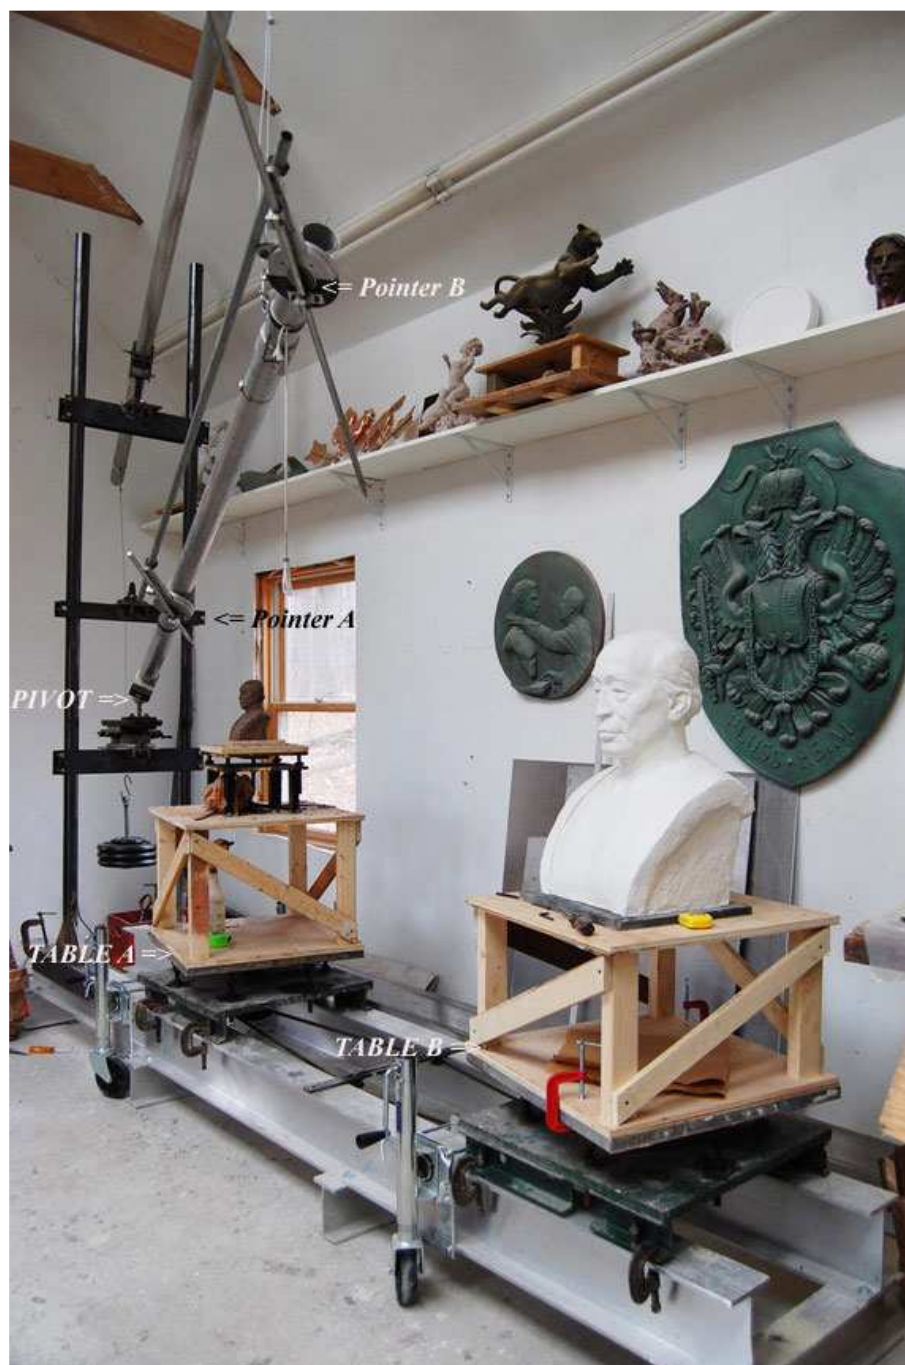

Рис. 2. Современный 3D-пантограф, используемый скульпторами (M. Keropian, [www.keropiansculpture.com](http://www.keropiansculpture.com)). 3D-пантограф позволяет пропорционально увеличивать или уменьшать объёмную фигуру. Пантограф имеет раму, на которой расположены две поворотные платформы. На одну платформу (Table A) устанавливают модель, на другой платформе (Table B) располагается увеличенная копия модели. К раме с помощью шаровой опоры (Pivot) крепится стрела. Стрела снабжена противовесом. На стреле имеются цилиндрические шарниры, к которым прикреплён параллелограммный механизм. На одном плече параллелограммного механизма закреплён острый щуп (Pointer A), на другом – острый указатель (Pointer B). Платформы, благодаря цепной передаче, можно синхронно поворачивать вокруг своих вертикальных осей, подставляя под щуп/указатель разные стороны модели/копии. Если коснуться щупом модели, то указатель покажет, где в пространстве находится соответствующая точка увеличенной копии.

После затвердевания модели стены, стена разбиралась. Теперь начиналась “магия”. Средневековые европейские строители с помощью 3D-пантографа,<sup>18</sup> молотка и стального зубила переносили с заданным масштабом рельеф поверхности с небольшого модельного глиняного блока на большую каменную заготовку, подходящих размеров и формы.



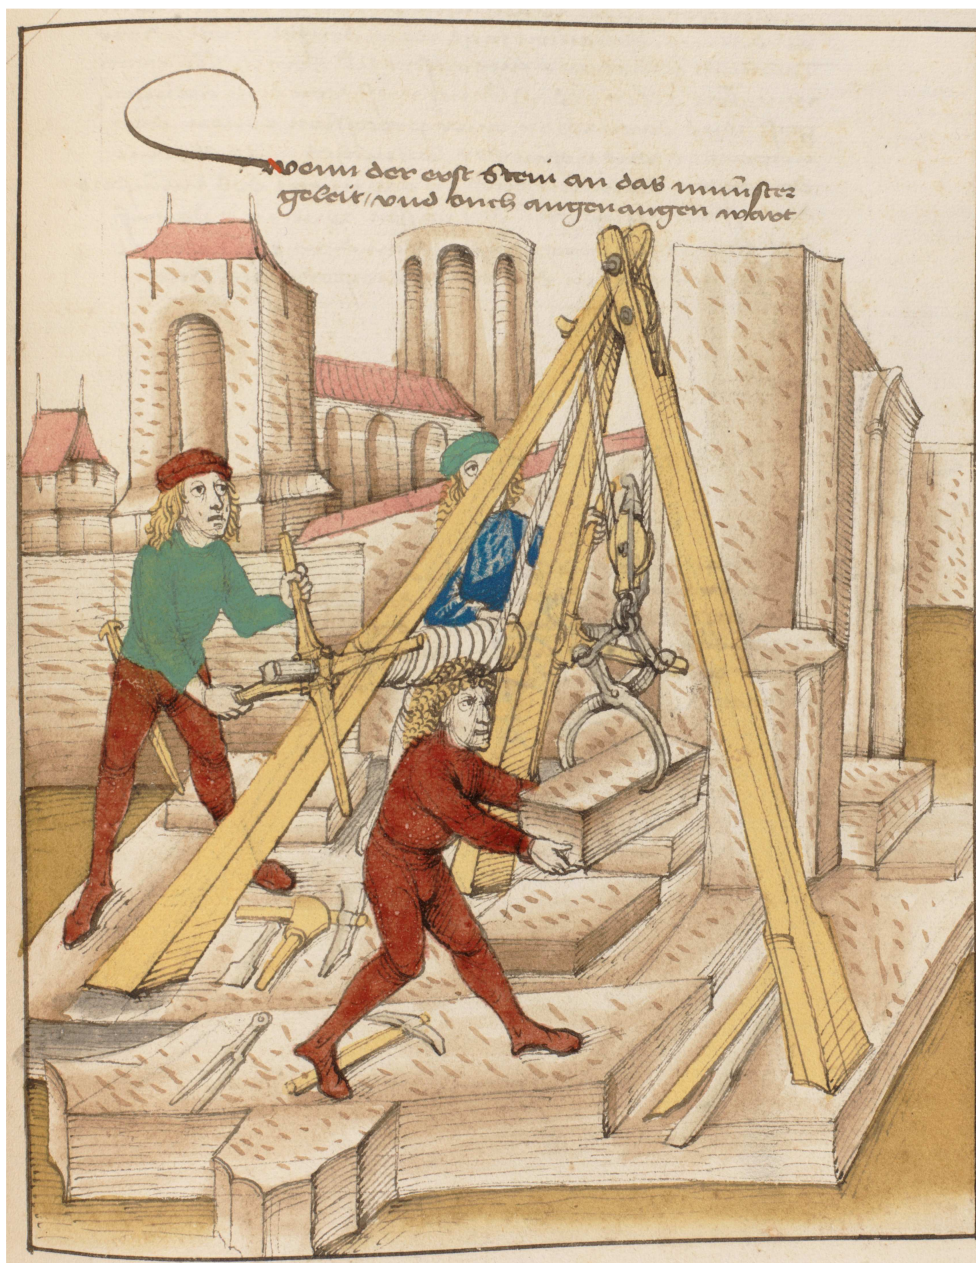

Илл. 1. Средневековые строители, использующие треножник с полиспастом и воротом для подъёма каменных блоков. Рисунок из рукописи 15 века. Для удержания каменного блока применяется клещевой захват. С помощью данного треножника можно не только поднимать каменный блок, но и перемещать его в горизонтальной плоскости.

Пантограф представляет собой простое шарнирно-рычажное устройство, в основе которого лежит параллелограммный механизм.<sup>24</sup> 2D-пантограф позволяет пропорционально увеличивать/уменьшать плоский рисунок.<sup>24,25</sup> Несколько более сложный 3D-пантограф<sup>26,27</sup> (см. Рис. 2), являющийся логическим развитием 2D-пантографа, позволяет пропорционально увеличивать/уменьшать объёмную фигуру, например, статую. В нашем случае с помощью 3D-пантографа получали увеличенную копию небольшой глиняной модели блока, обрабатывая молотком и зубилом каменную заготовку.

Параллелограммный механизм расположен на стреле 3D-пантографа. Благодаря цилиндрическим шарнирам параллелограммный механизм может свободно вращаться вокруг стрелы. Стрела крепится к раме с помощью шаровой опоры (Pivot на Рис. 2). Стрела снабжена противовесом. На одном плече параллелограммного механизма закреплён острый щуп (Pointer A на Рис. 2), на другом – острый указатель (фактически такой же щуп; Pointer B на Рис. 2). Если коснуться щупом глиняной модели, то указатель покажет, где в пространстве находится соответствующая точка увеличенной копии. Коэффициент уве-



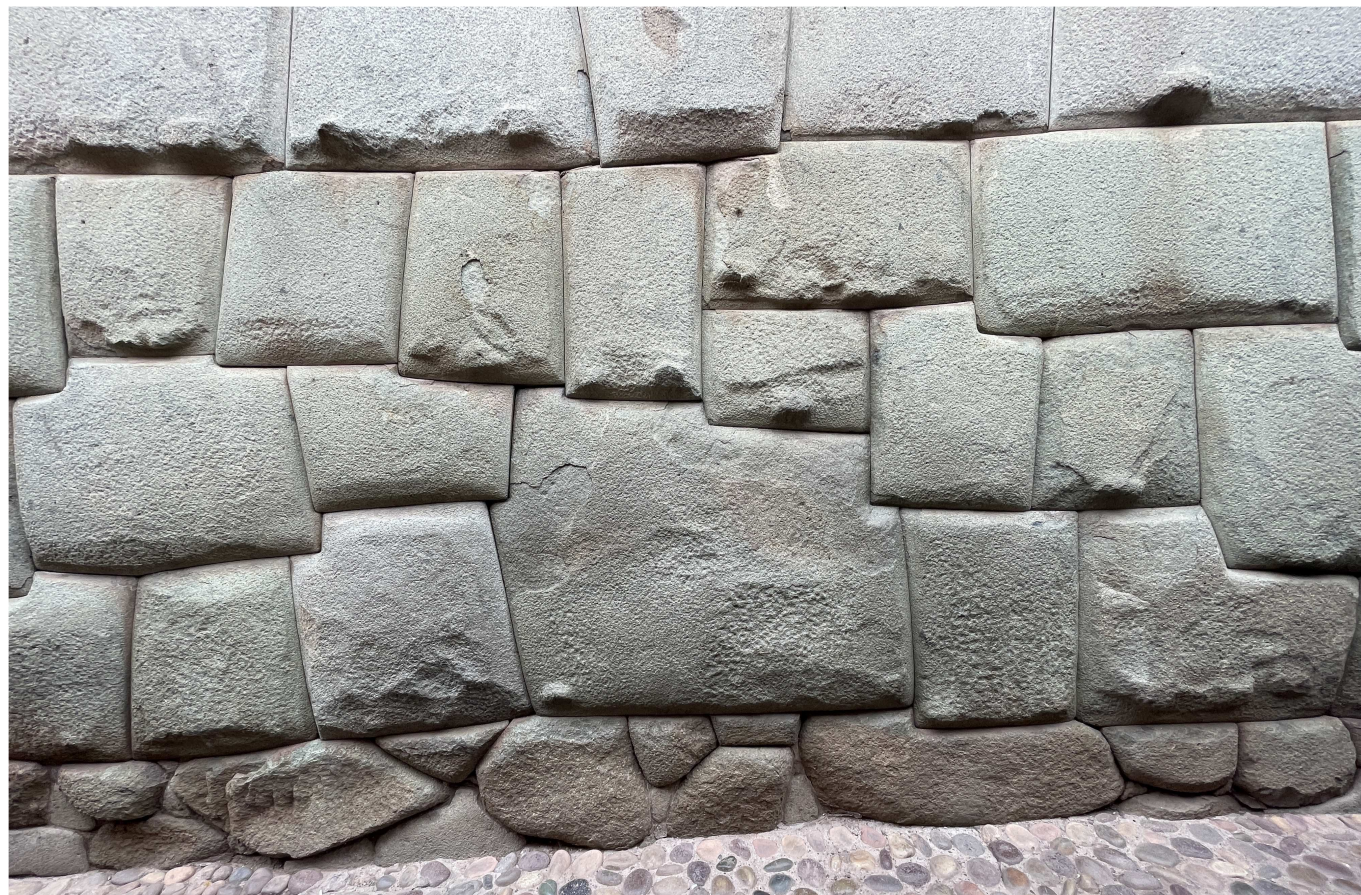

Фото. 1. Куско (В. М. Сорока, 2021).

личения задаётся должной установкой плеч рычажной системы. Модель и её увеличенная копия располагаются каждая на своей поворотной платформе (Table A и Table B, соответственно) тыльной стороной вниз. Платформы, благодаря цепной передаче, можно синхронно поворачивать вокруг своих вертикальных осей, подставляя под щуп/указатель разные стороны модели/копии.

Минимальный размер модельного глиняного блока зависел от размера изготавливаемого каменного блока и, в конечном счёте, определялся погрешностью работы механизма пантографа. Размер модельного блока также определялся тем, насколько удобно управлять с таким блоком (лепить, править, переносить, устанавливать, сдвигать, переворачивать и т. п.) одному-двум работникам. Современные 3D-пантографы, используемые скульпторами<sup>26,27</sup> (см. Рис. 2), позволяют увеличивать модель объекта до 6 раз. Таким образом, по глиняной модели блока размером, скажем, 50×50×50 см, которую для облегчения и уменьшения усадки можно сделать пустотелой, с помощью не самого большого пантографа возможно обрабатывать каменные блоки размером до 3×3×3 м.

Отметим, что, установив на пантограф каменную заготовку, можно быстро подобрать подходящую для этой заготовки глиняную модель блока. Данная возможность крайне полезна именно в случае полигонального типа кладок, так как в таких кладках исходные каменные блоки часто имеют сложную форму, что при подборе заготовки требует множества предварительных обмеров.

После указанного копирования с заданным масштабом стена из каменных блоков без каких-либо подгонок собиралась с использованием салазок, катков, рычагов, стальных ломов, блоков,<sup>28</sup> полиспастов,<sup>29</sup> лебёдок<sup>30</sup> и кранов<sup>31</sup> того времени.<sup>12,13,32,33,34,35</sup> В качестве примера на Илл. 1 приводится рисунок из рукописи 15 века,<sup>36</sup> на котором, используя треножник с полиспадом и воротом, средневековые строители выполняют подъём каменных блоков. С помощью такого треножника можно не только поднимать каменный блок, но и перемещать (волочить) блок в горизонтальной плоскости. Для этого попеременно опус-



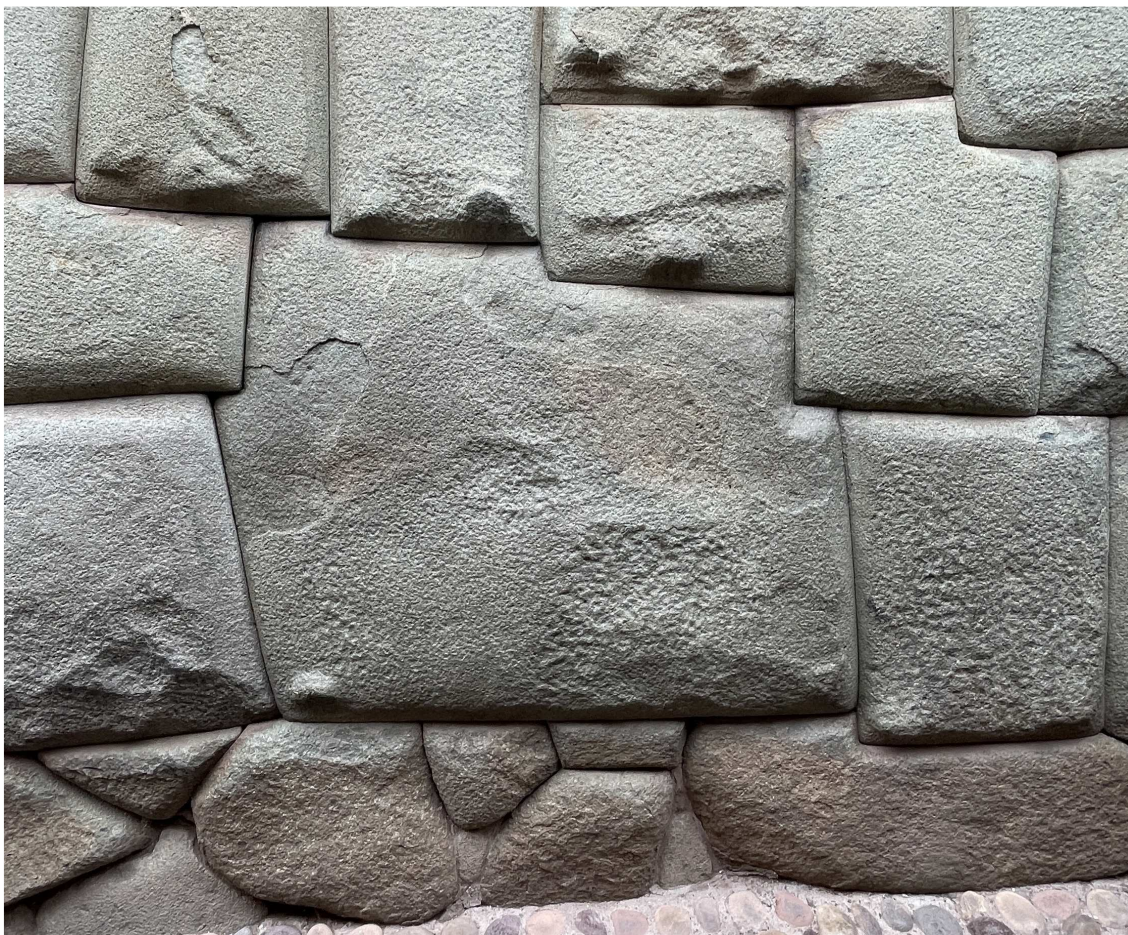

Фото. 2. Куско (В. М. Сорока, 2021).

кают каменный блок на землю, сдвигают треножник на небольшое расстояние и снова приподнимают каменный блок над землёй.

Лицевая сторона каменного блока может копироваться с лицевой стороны его глиняной модели, но может обрабатываться или дорабатываться после сборки полигональной постройки. Если стена не является подпорной, то окончательную обработку её поверхности, образуемую тыльными сторонами каменных блоков, удобнее выполнять после сборки стены.

Элементы стены, образующие внешний угол, следует располагать на поворотных платформах пантографа лицевой стороной вниз, чтобы обеспечить доступ к обрабатываемым нижней, верхней и боковым граням. Для установки на платформе пантографа (Table A) глиняной модели углового элемента на её лицевой поверхности предусматривается опорная плоскость подходящей площади. Для фиксации на платформе пантографа (Table B) каменной заготовки углового элемента используются клинящие камни. Обработку лицевой поверхности угловых каменных блоков удобнее выполнять после окончательной сборки примыкающих к ним стен.

При размещении полигональной кладки на выровненном укрепленном грунте первый ряд образуют каменные блоки небольшого размера с плоским основанием, которые обрабатываются по соответствующим глиняным моделям. Каменные блоки второго ряда обычно заметно крупнее блоков первого ряда (см. для примера Фото. 1-5). Почему так? Почему большие блоки второго ряда не кладутся на такие же большие или ещё большие блоки? Для подобного устройства кладки должны быть веские причины. Ведь, чем выше располагается большой тяжёлый блок, тем выше центр тяжести, тем менее устойчивой будет стена. К тому же несущая способность маленьких камней меньше, чем больших.

В качестве примера рассмотрим стену на улице Атунрумийок (Hatunrumiyoc) в Куско (см.



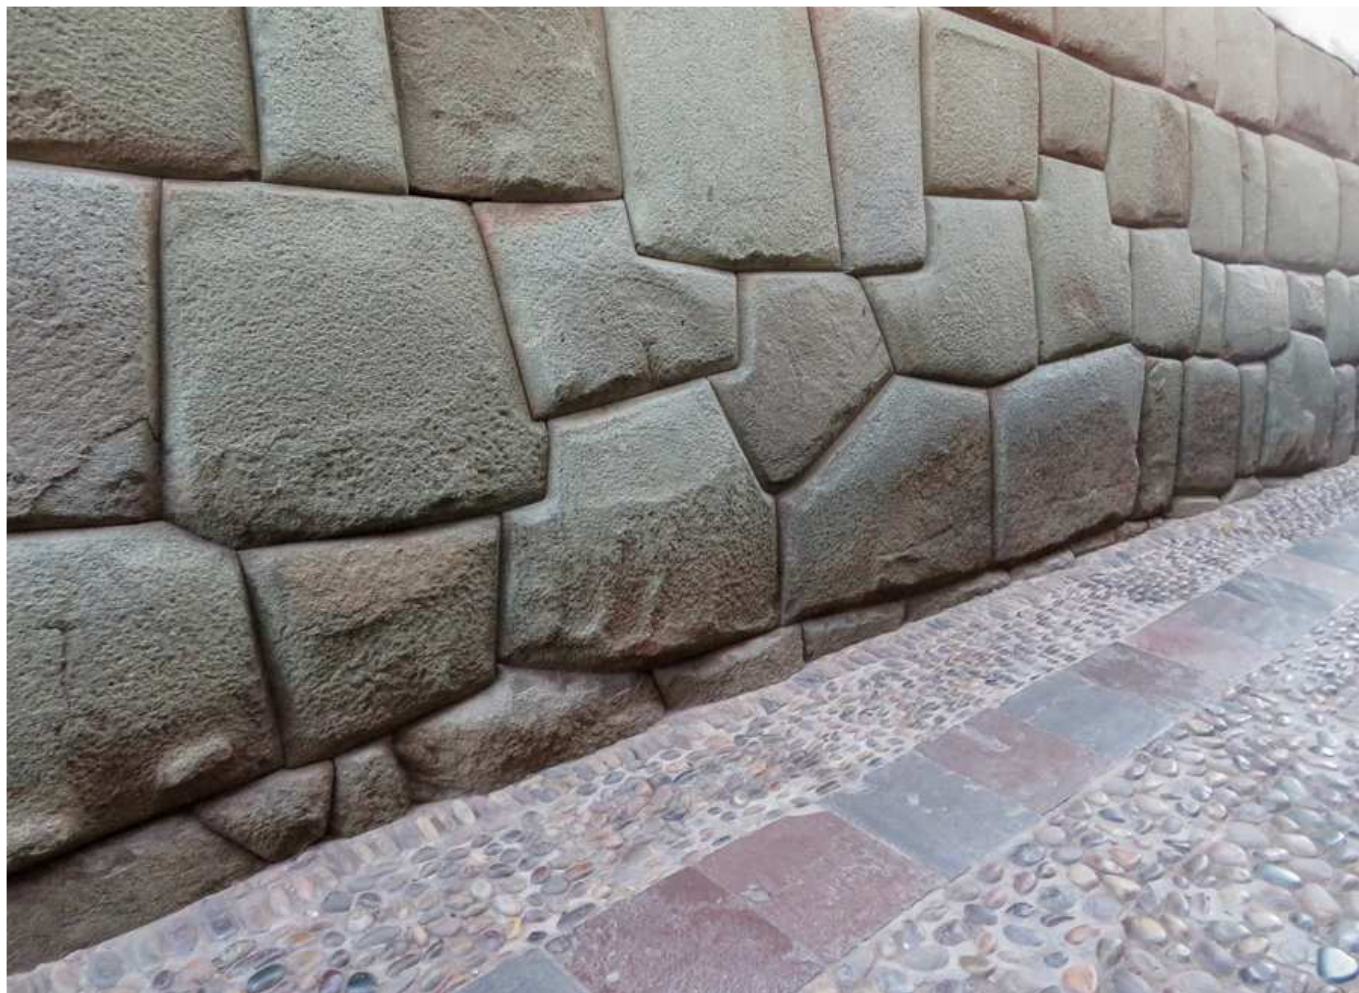

Фото. 3. Куско (С. Н. Козинцев, photo.sirano.info).

Фото. 1-5). Так как улица имеет уклон, то можно подумать, что небольшие камни в основании больших блоков стены нужны для учёта этого уклона. Однако у этой же стены имеются участки полигональной кладки, где один ряд камней расщепляется на два или два ряда сливаются в один. Например, на Фото. 1, если двигаться слева направо, второй и третий ряды сливаются в один – второй ряд, а четвёртый ряд расщепляется на два ряда – третий и четвёртый. Таким образом, мы видим, что, уклон улицы всегда можно было учесть, используя приём со слиянием/расщеплением рядов кладки.

На самом деле всё просто. Только используя небольшие блоки первого ряда в качестве клиньев, возможно выбрать боковые зазоры между большими каменными блоками второго ряда, т. е. правильно расположить эти блоки относительно друг друга. Только при условии правильного относительного расположения больших блоков второго ряда все остальные вышерасположенные ряды можно уложить с минимальными зазорами.

Указанная особенность является ещё одним подтверждением того, что стенка из полигональных блоков рассматриваемого типа не строилась ряд за рядом с подгонкой камней по месту,<sup>11</sup> а изготавливалась по уменьшенной глиняной модели и затем только собиралась. При строительстве ряд за рядом, первый ряд кладки всегда бы состоял из самых крупных каменных блоков, поскольку при таком подходе как посадочное место под очередной каменный блок, так и сам этот каменный блок изготавливаются последовательно по месту.

Если основание из небольших каменных блоков первого ряда выбивается из общей эстетики конкретной полигональной кладки, то оно скрывается слоем грунта (см. Фото. 5, 10). Грунт под весом кладки будет уплотняться, а небольшие камни-клинья первого ряда могут трескаться и крошиться, тогда кладка будет “разъезжаться”. Чтобы исключить такое



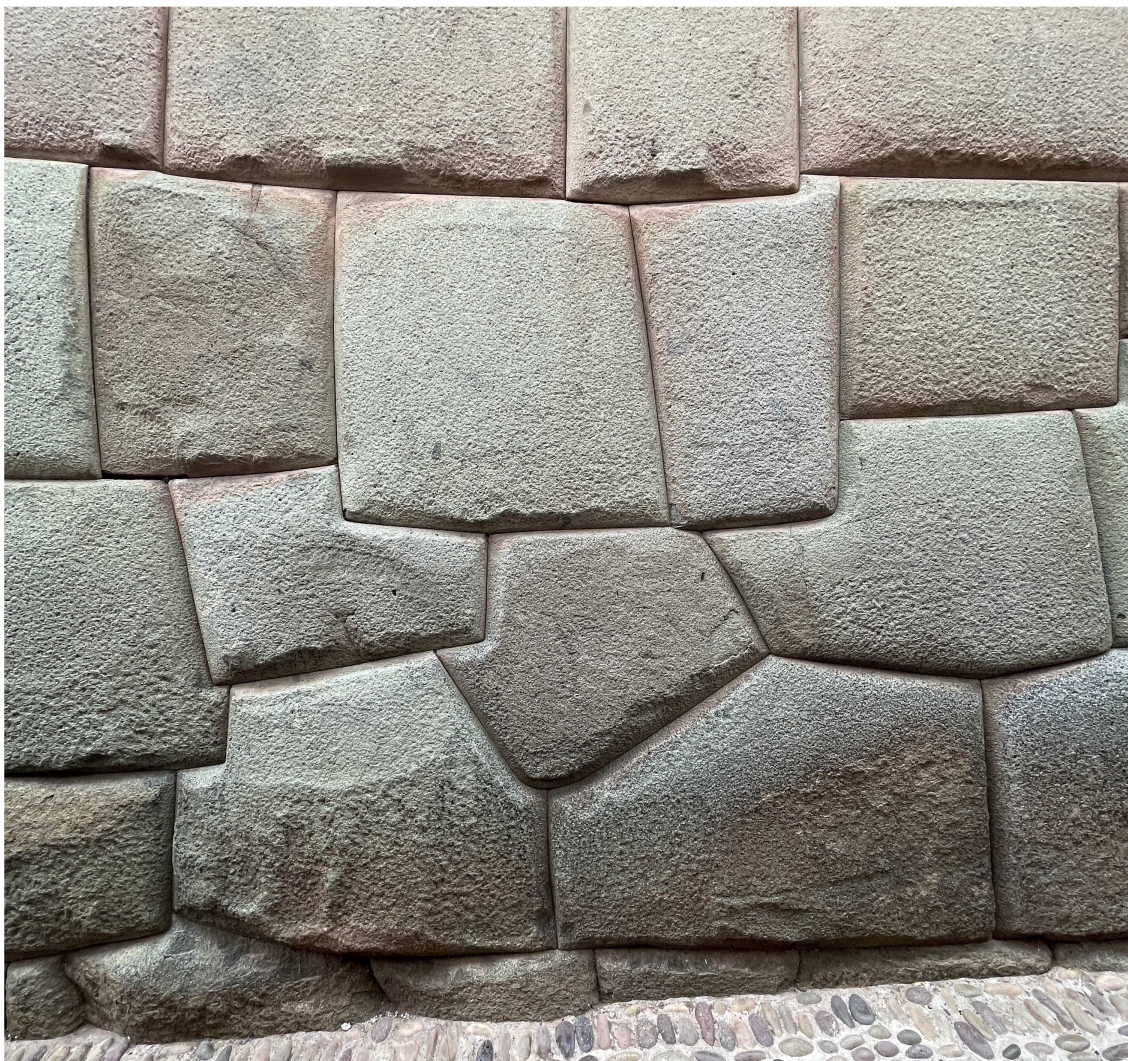

Фото. 4. Куско (В. М. Сорока, 2021).

развитие, используются твёрдые без видимых дефектов клинящие камни и не в одном, а в нескольких местах, грунт под постройкой укрепляется,<sup>11</sup> после укладки двух первых рядов работы на данном участке останавливают и за кладкой некоторое время наблюдают и т. п.

В случае размещения полигональной кладки на скальном основании, оно предварительно подготавливается. Например, в скальном основании изготавливаются L- или U-образные выемки. Далее из глины на подготовленном участке скалы формируются небольшие блоки первого ряда, которые для облегчения их веса и уменьшения усадки делаются полыми. После сушки полноразмерные глиняные блоки извлекаются из скального основания и помещаются в пантограф на место каменной заготовки (Table B на Рис. 2). С помощью пантографа по глиняным полноразмерным блокам первого ряда изготавливаются их уменьшенные глиняные модели. Полученные уменьшенные модели блоков первого ряда сушатся.

Чтобы исключить повреждение нижней поверхности модельных блоков первого ряда, модельные блоки помещают в ложа с плоским основанием, вдавливая в бруски из сырой глины. Правильное взаимное положение модельных блоков первого ряда определяется по примыканию этих блоков друг к другу по боковым граням. Для уменьшения погрешности взаимного положения площади боковых граней блоков первого ряда следует стремиться делать сравнимыми с площадями оснований этих блоков. Правильное взаимное положение блоков первого ряда на месте постройки модельной стены достигается подсыпанием грунта и подкладыванием мелких клинящих камней под ложа этих блоков.

Предложенный способ переноса геометрии с небольшой глиняной модели на большой



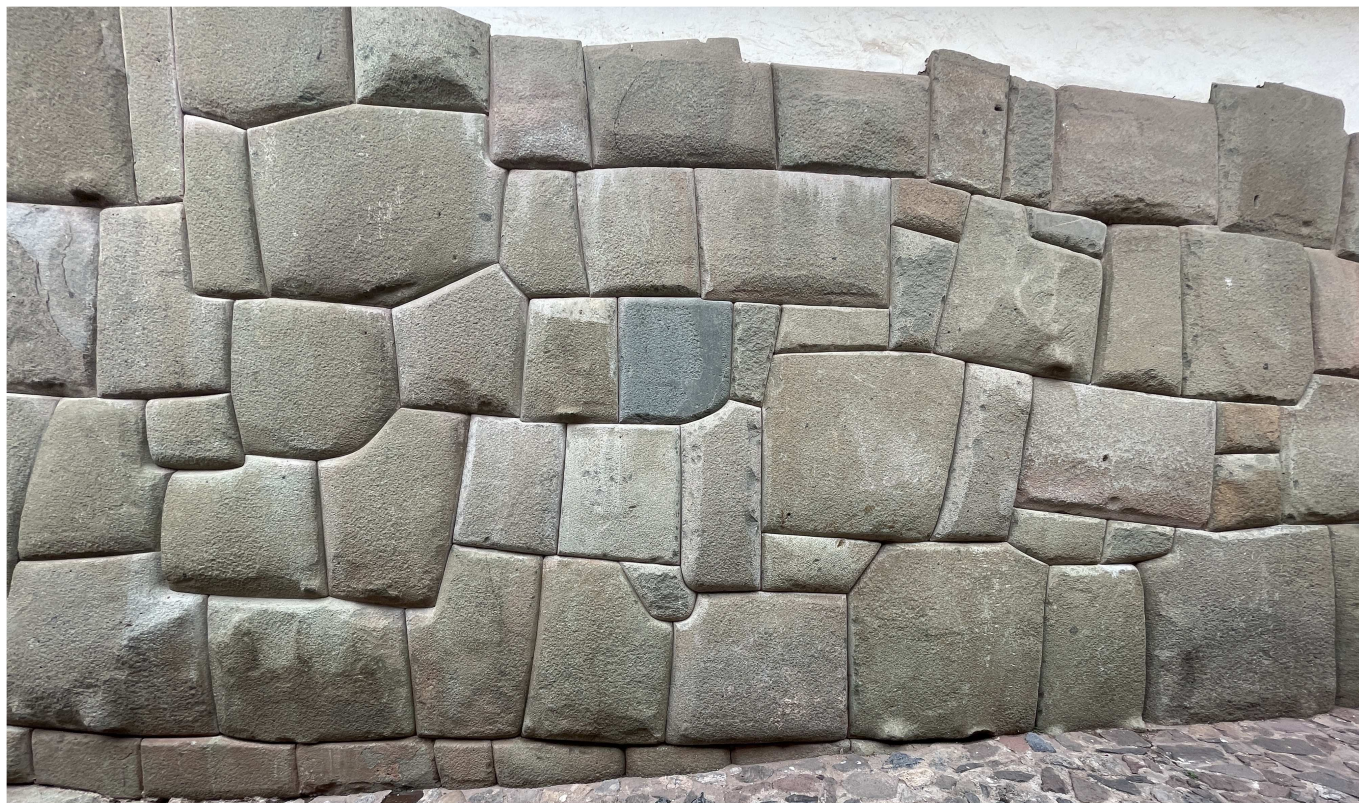

Фото. 5. Куско (В. М. Сорока, 2021).

каменный блок с помощью 3D-пантографа не требует детальной прорисовки геометрии блока (см. для сравнения представленный в работе 9 современный подход, использующий высокотехнологичные средства проектирования, измерения, изготовления и контроля). Строителю требуется фактически руками (а также применяя такие инструменты как стеки, шпатели, правила, скребки, проволоочные петли и им подобные) приблизительно вылепить сам блок и его сопряжение с соседними блоками в соответствии с общей задумкой на эскизе; затем заложить этот блок в модельную стену, где он окончательно под собственным весом и с небольшими правками строителя досопрягается с соседними модельными блоками. Никакие точные размеры при этом выдерживать не нужно.

### **2.2. Использование пантографа для изготовления блоков полигональной кладки методом литья**

С помощью предложенного способа также можно получать большие блоки из бетона,<sup>37</sup> геополимерного бетона,<sup>38</sup> извести, искусственного гранита<sup>39,40,41,42</sup> и других материалов путём их отливки в форму. Используя пантограф, уменьшенную глиняную модель блока увеличивают до нужного размера. Увеличенная модель из глины для уменьшения веса и усадки делается пустотелой. Далее по увеличенной глиняной модели изготавливается литевая форма.

Поскольку на величину межблочного зазора существенное влияние оказывает усадка, то для её уменьшения отливаемые блоки можно делать пустотелыми. Кроме того, отливаемые блоки можно делать, состоящими из двух компонентов – болванки (сплошной или полый) из дешёвого бетона и сравнительно тонкой внешней оболочки (слоя “штукатурки”) из более дорого искусственного гранита. Сначала отливается болванка. Затем, после окончания процесса усадки поверх болванки отливается достаточно тонкая оболочка. Усадка оболочки незначительна из-за её небольшой толщины. Для обеспечения прочности и долговечности оболочки её коэффициент теплового расширения (КТР)<sup>43</sup> должен быть максимально приближен к КТР бетонной болванки.<sup>44</sup>

Увеличенные глиняные модели для полый/сплошной болванки и для внешней оболочки изготавливаются по одной и той же уменьшенной глиняной модели блока с помощью пан-



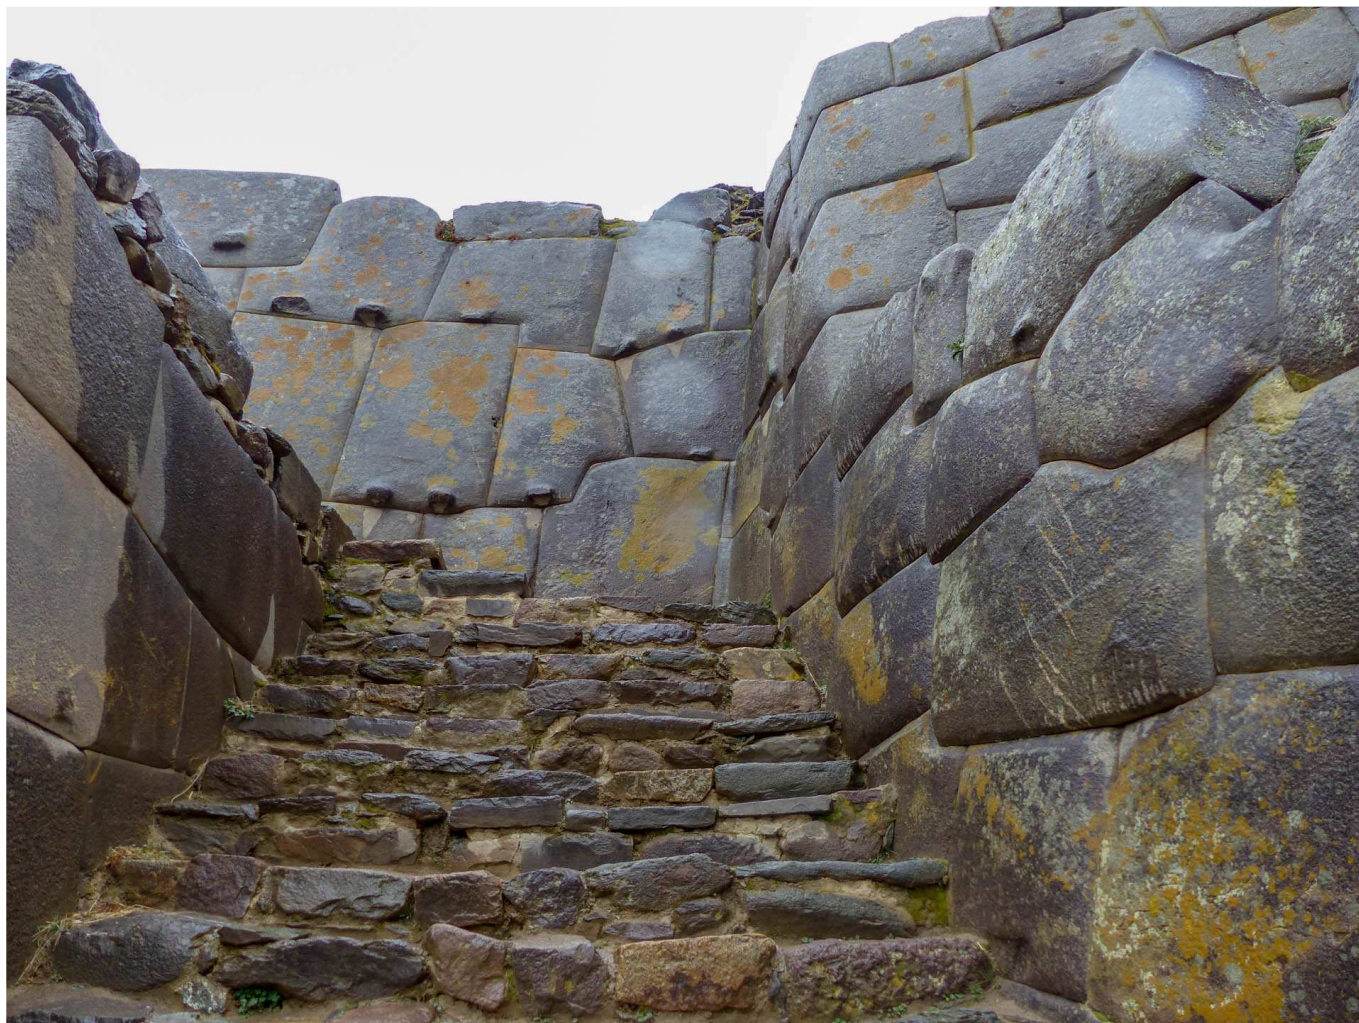

Фото. 6. Ольянтайтамбо (С. Jansen, M. Düerkop, 2016, [www.travel-badger.com](http://www.travel-badger.com)).

тографа, настроенного на соответствующий коэффициент увеличения. Для повышения сцепления оболочки с болванкой на лицевой поверхности увеличенной модели болванки создаются радиальные канавки, которые продолжают на боковых поверхностях. Канавки создаются либо непосредственно указателем пантографа (Pointer B), либо укрепленной на указателе проволоочной петлей. Несмотря на то, что на гранитных блоках некоторых перуанских построек имеются отслоения, похожие на описанную внешнюю оболочку (см. Фото. 1-3, 5 и 15), толщины этих отслоений малы и поэтому данные отслоения скорее следует отнести к результатам естественного разрушения камня<sup>45</sup> или неудачной реставрации/консервации.

Хотя предложенный способ литья и в состоянии обеспечить изготовление полигональной кладки из крупных плотно примыкающих друг другу блоков, но в сравнении со способом механической обработки является значительно более трудоёмким. Дело в том, что данный способ литья помимо уменьшенной модели требует дополнительного изготовления ещё, как минимум, двух глиняных моделей блока в натуральную величину с последующим изготовлением по этим моделям двух литевых форм – одной для бетонной болванки, другой для оболочки из искусственного гранита. Для получения полый болванки требуется ещё одна полноразмерная глиняная модель с минимальной детализацией, а в одном из вариантов изготовления ещё одна литевая форма.

Поскольку форма каменных блоков, используемых в полигональной кладке, достаточно простая, то с помощью 3D-пантографа по уменьшенной глиняной модели и оттиску её лицевой поверхности возможно непосредственное (т. е. без промежуточного изготовления полноразмерных глиняных моделей) изготовление полноразмерных литевых форм. Для этого в глиняной лепёшке делают отпечаток лицевой поверхности глиняной модели.



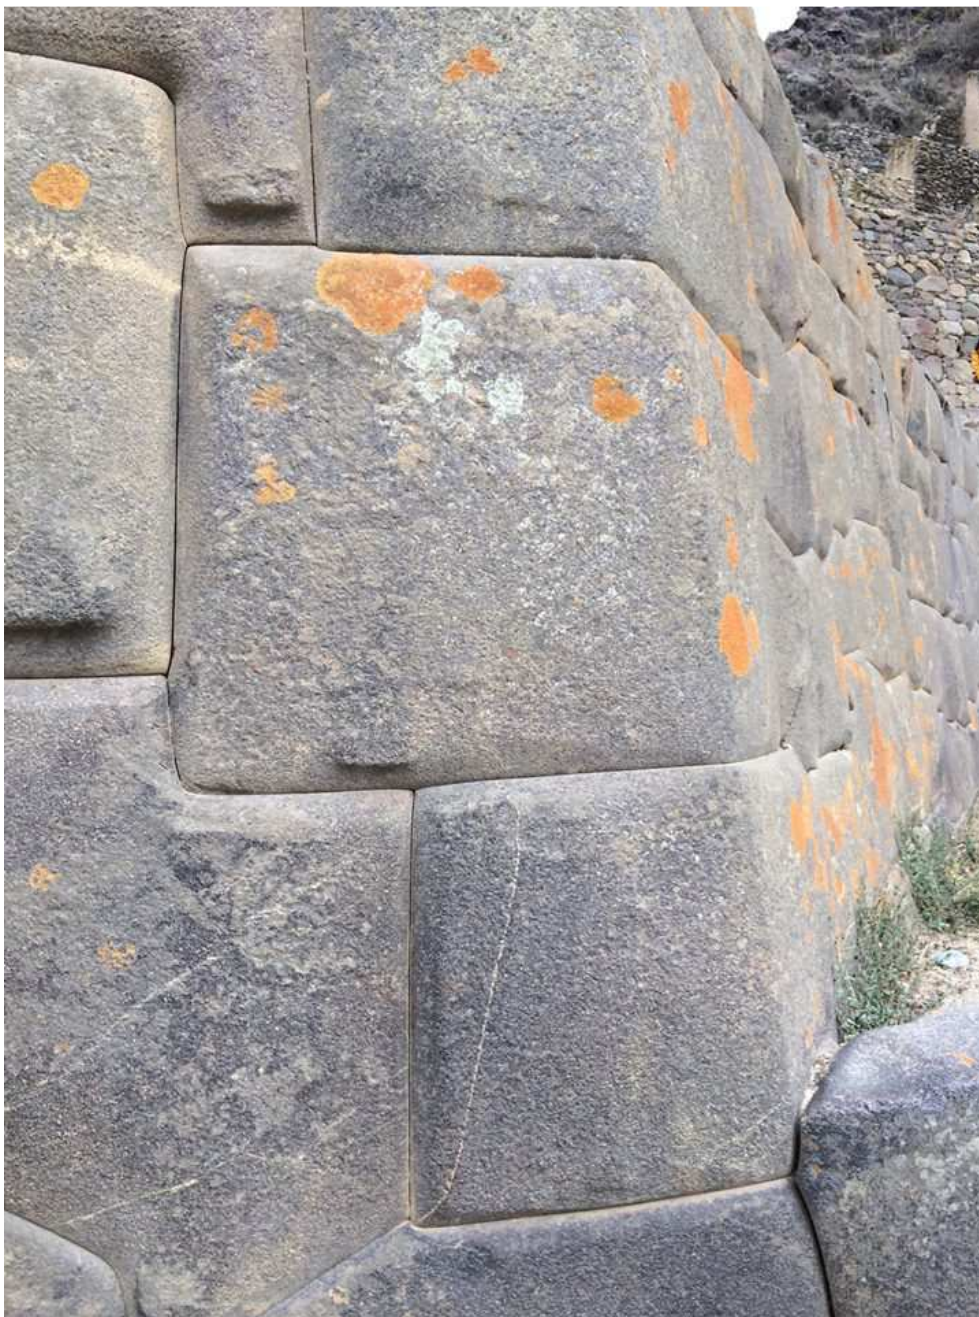

Фото. 7. Ольянтайтамбо (B. Everett, [www.facebook.com/barry.everett.3](https://www.facebook.com/barry.everett.3)).

После затвердевания отпечатка глиняная модель помещается в свой отпечаток и в таком виде устанавливается на свою поворотную платформу (Table A на Рис. 2) лицевой стороной вниз. Глиняная заготовка под полноразмерную литевную форму устанавливается на поворотную платформу увеличенной модели (Table B) открытой частью (соответствует тыльной стороне отливаемого блока) вверх.

Вначале с помощью 3D-пантографа переносят боковые поверхности модели (основание блока, верхняя сторона и боковые стороны) на боковые внутренние поверхности литевой формы. Для переноса боковых поверхностей вместо обычного указателя в пантограф устанавливают П-образный указатель, остриё которого направлено противоположно острию обычного указателя. После копирования-масштабирования боковой поверхности уменьшенную глиняную модель извлекают из её отпечатка и с помощью 3D-пантографа переносят лицевую поверхность с отпечатка на дно литевой формы, используя обычный прямой указатель. Если применяется разъёмная литевая форма, состоящая из нескольких частей, то перенос формы модели начинают с переноса поверхности отпечатка на основание (дно) литевой формы. Затем модель помещают в отпечаток и, последовательно примыкая к основанию боковые части литевой формы, с помощью пантографа



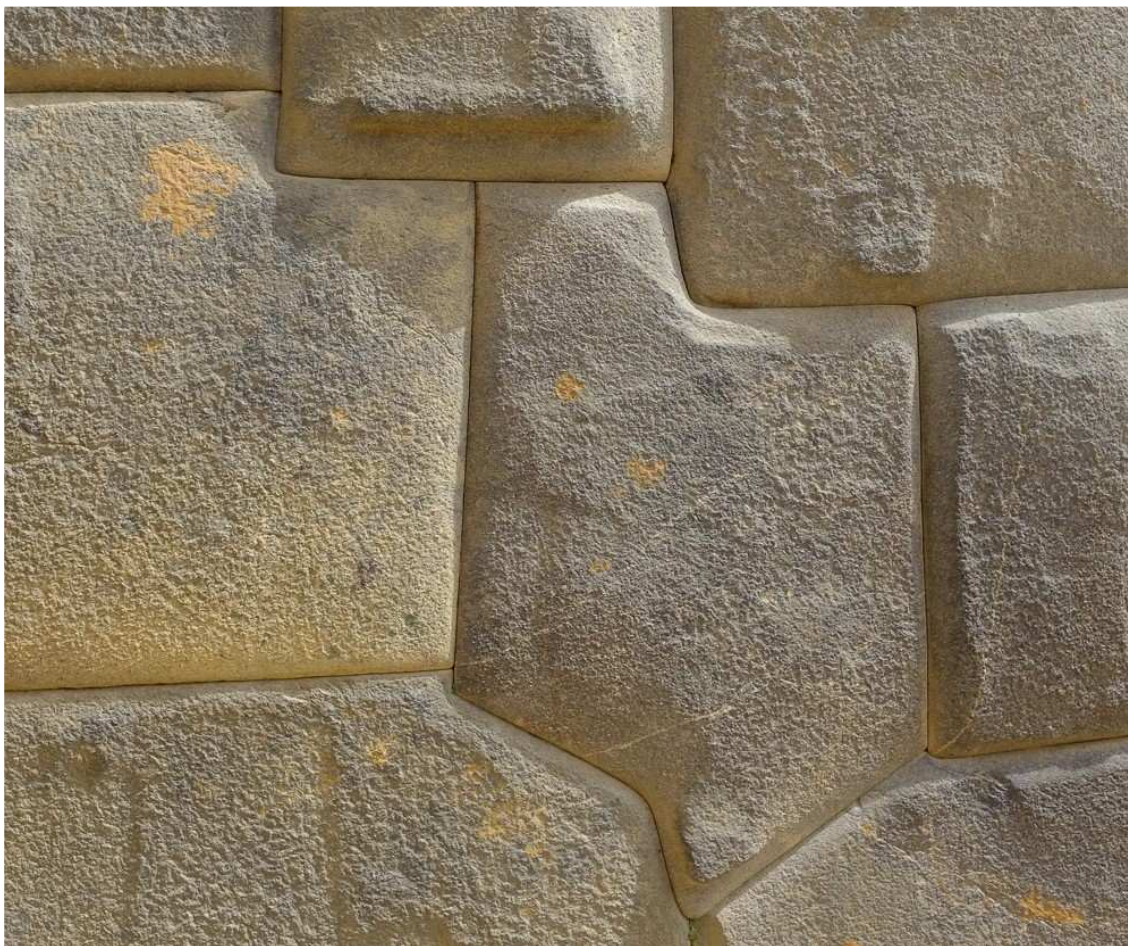

Фото. 8. Ольянтайтамбо (С. Boudou, 2013).

переносят на внутренние поверхности этих частей боковые поверхности модели.

Предложенный способ литья можно упростить и удешевить, если в качестве болванки использовать грубо обработанный механически природный камень, по форме примерно повторяющий в уменьшенном масштабе форму конечного изделия. Однако в этом случае оболочка будет иметь неодинаковую толщину, что, в свою очередь, может повлиять на постоянство зазоров между блоками (из-за неравномерной усадки). Нужный каменный блок, выполняющий роль болванки, можно изготовить как просто по основным размерам, так и по уменьшенной глиняной модели с использованием пантографа. Тыльная сторона отливаемого блока в данном способе может не иметь наружного слоя оболочки вообще, поскольку в большинстве построек в этом месте не требуется выбирать зазор между блоками или заботиться о внешнем виде изделия.

Поскольку каменные блоки в полигональной кладке испытывают весовую нагрузку от нескольких тонн до нескольких десятков тонн, то при определённых обстоятельствах, скажем, при толчках, вызванных землетрясением, может произойти разрушение внешней твёрдой, но хрупкой оболочки из искусственного гранита. Перечисленные особенности показывают, что представленный способ литья хотя и в состоянии обеспечить требуемый результат (небольшие зазоры), но для целей строительства слишком сложен и дорог, и не гарантирует необходимой долговечности постройки в сейсмоопасном регионе.

### **2.3. Использование реплик**

#### **2.3.1. Реплика-блин**

Не очень сложные сопряжения крупных каменных блоков выполнялись с использованием реплик. Из глины выдавливался/раскатывался “блин” постоянной толщины. Сырой блин укладывали на каменный блок, реплику поверхности которого нужно было изготовить (поверхность камня предварительно покрывалась составом, не дающим глине прилипнуть).



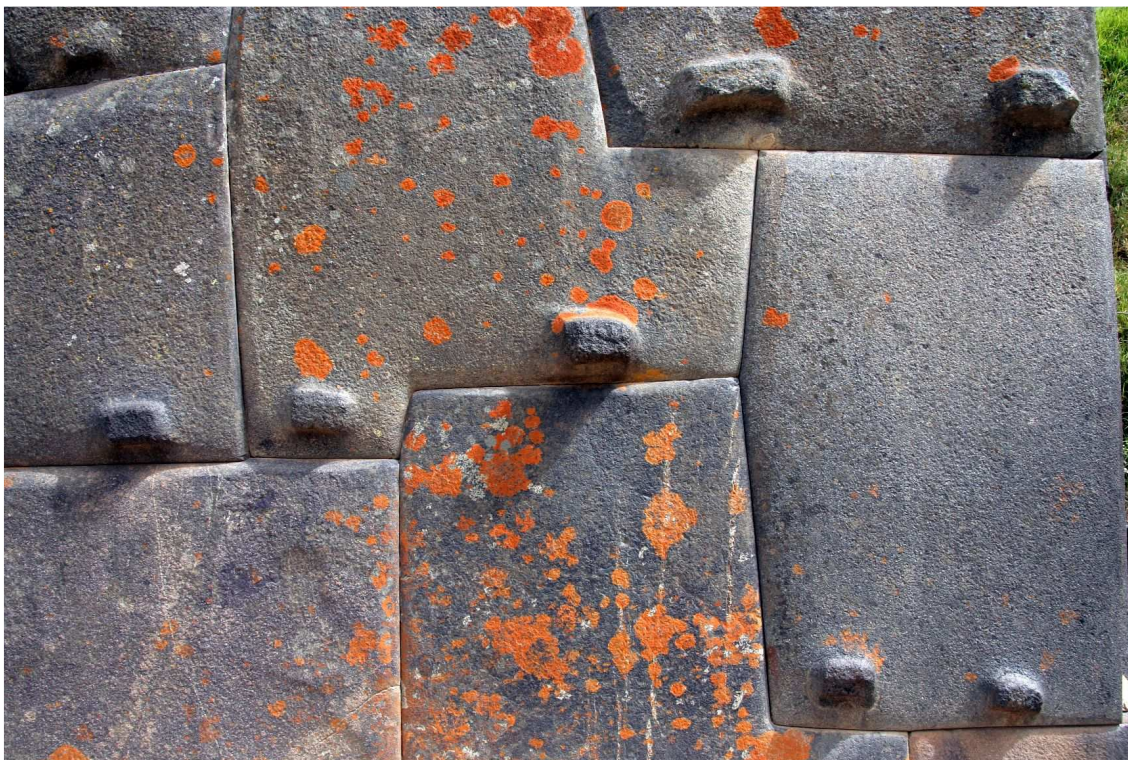

Фото. 9. Ольянтайтамбо (B. Foerster, 2009, [hiddenincatours.com](http://hiddenincatours.com)).

После затвердевания реплику-блин снимали. Периодически прикладывая полученную лёгкую реплику-блин к тяжёлому ответному каменному блоку, постепенно удаляли в местах контакта лишний материал до полного прилегания реплики к блоку.

Чем мельче передаваемый рельеф, тем тоньше должна быть реплика-блин. На практике реплика-блин в состоянии передать только сравнительно плавные изменения поверхности камня. При попытке передать мелкие детали применяемая реплика-блин оказывается слишком тонкой, отчего изгибается уже под собственным весом и легко ломается. Чтобы в ходе обработки каменных блоков избежать изгиба и не допустить случайного разрушения, хрупкую и всё ещё достаточно тонкую реплику-блин после отделения от поверхности оригинала следует прикрепить к какой-нибудь подложке-держателю. С помощью реплики-блина невозможно точно переносить рельеф в виде крутых холмов/впадин, так как при этом в теле реплики образуются складки. Складки ведут к изменениям в толщине реплики, а, следовательно, и к искажению копируемого рельефа. В целом преимущество реплики-блина – её простота; недостаток – достаточно высокая погрешность.

Поскольку реплика-блин сравнительно тонкая, то её поперечная усадка незначительная. В отличие от реплики реплики, описываемой ниже, поперечная усадка в реплике-блине уже не может быть никак исправлена впоследствии. Чтобы недопустить связанной с усадкой продольной деформации, материал, используемый для изготовления реплики-блина, должен иметь малый коэффициент усадки и/или в процессе сушки реплику-блин следует каким-то образом прижать к поверхности оригинала. Прижимать реплику-блин следует так, чтобы её толщина в любом месте оставалась одной и той же. Прижимать реплику-блин можно, разместив между грузом и репликой-блином предварительно изготовленный в глиняном бруске отпечаток поверхности оригинала. Последнее усовершенствование вплотную подводит нас к способу реплики реплики, обсуждаемому далее.

### **2.3.2. Реплика реплики**

Если требовалась большая точность передачи рельефа, чем та, что обеспечивается репликой-блином, то изготавливалась реплика реплики. Вначале, приложив брусок сырой глины к выбранному участку каменного блока, делали отпечаток его поверхности. После затвердевания полученной репликой делали ещё один отпечаток в сырой глине. После



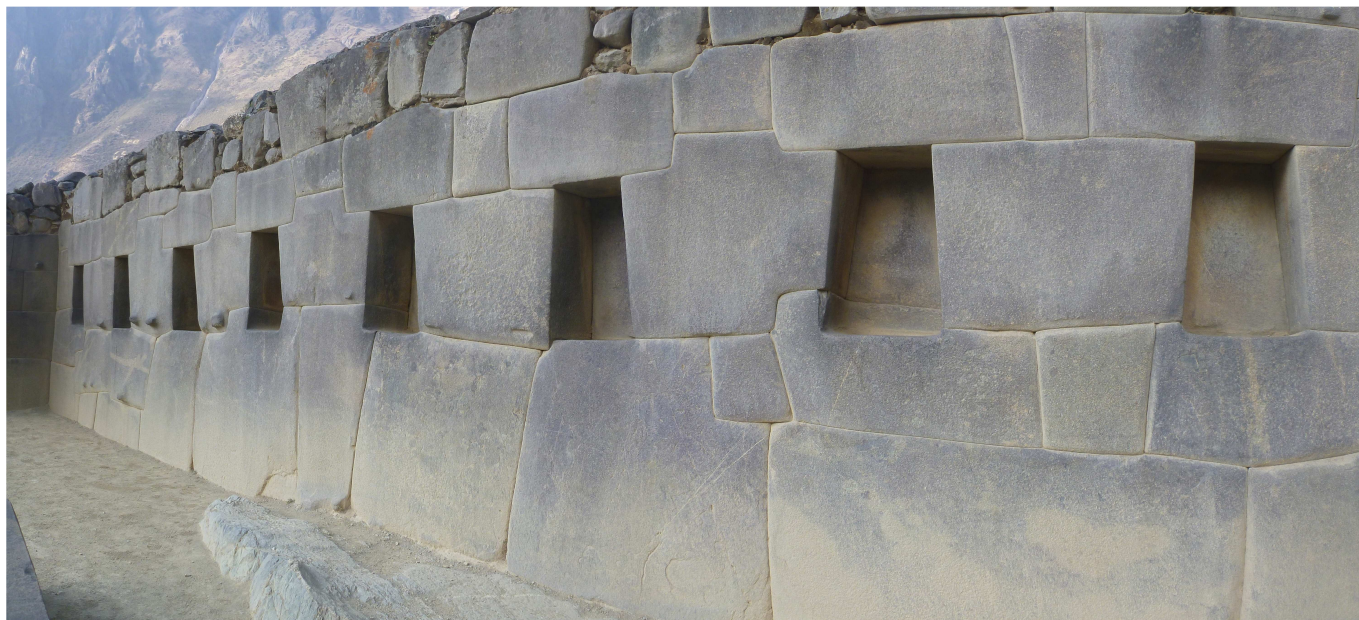

Фото. 10. Храм десяти ниш, Ольянтайтамбо (Р. Adams, 2012, [manboyinthepromisedlanddot-com.wordpress.com](http://manboyinthepromisedlanddot-com.wordpress.com)).

сушки реплику реплики использовали далее в качестве копии участка поверхности каменного блока при изготовлении ответной части каменной кладки.

В другом способе по периметру выбранного участка каменного блока устанавливали бортик из глины, после чего образовавшуюся емкость заполняли гипсом. После затвердевания полученной репликой делали отпечаток в сырой глине или, установив бортик на реплику, заполняли образовавшуюся емкость гипсом (поверхность гипсовой формы предварительно покрывалась составом, препятствующим схватыванию заливаемого гипса с гипсовой формой). После сушки полученную реплику реплики использовали далее в качестве копии участка поверхности каменного блока при изготовлении ответной части каменной кладки.

Реплики также использовались в местах примыкания каменных построек из крупных блоков к скалам. Реплика снималась с предварительно подготовленного участка скалы и затем прикладывалась к обрабатываемому каменному блоку, или наоборот реплика снималась с обработанного каменного блока и затем прикладывалась к обрабатываемой скале. Всё зависело от того, что было удобнее в каждом конкретном случае. Поскольку очень большие каменные блоки подобны скалам – их чрезвычайно трудно двигать, то реплики также использовались при стыковке больших блоков к очень большим блокам и очень больших блоков к другим очень большим блокам.

Чем больше размеры каменного блока, тем больше и тяжелее изготавливаемые по нему реплики. Поэтому, начиная с определённого размера каменного блока, реплики приходится снимать с отдельных участков каменного блока. Чтобы обеспечить правильное взаимное положение реплик на обрабатываемой ответной поверхности блока/скалы, участки соседних реплик должны частично перекрываться.

Недостатками реплик являются – более высокая, чем у пантографа, погрешность сопряжения поверхностей смежных блоков и более высокая по сравнению с уменьшенной моделью блока трудоёмкость изготовления. Погрешность реплики реплики вызвана, главным образом, усадкой глины/гипса. Связанная с усадкой погрешность реплики реплики в два раза больше погрешности однократной реплики. Чтобы уменьшить вызываемую усадкой погрешность реплики реплики, на реплику наносится тонкий слой сырой глины, после чего реплика прижимается к оригиналу. В результате сырая глина заполняет пустоты, после чего реплика и оригинал разнимаются, и реплика сушится. Далее аналогичные действия производятся с репликой реплики. При необходимости процесс повторяется.

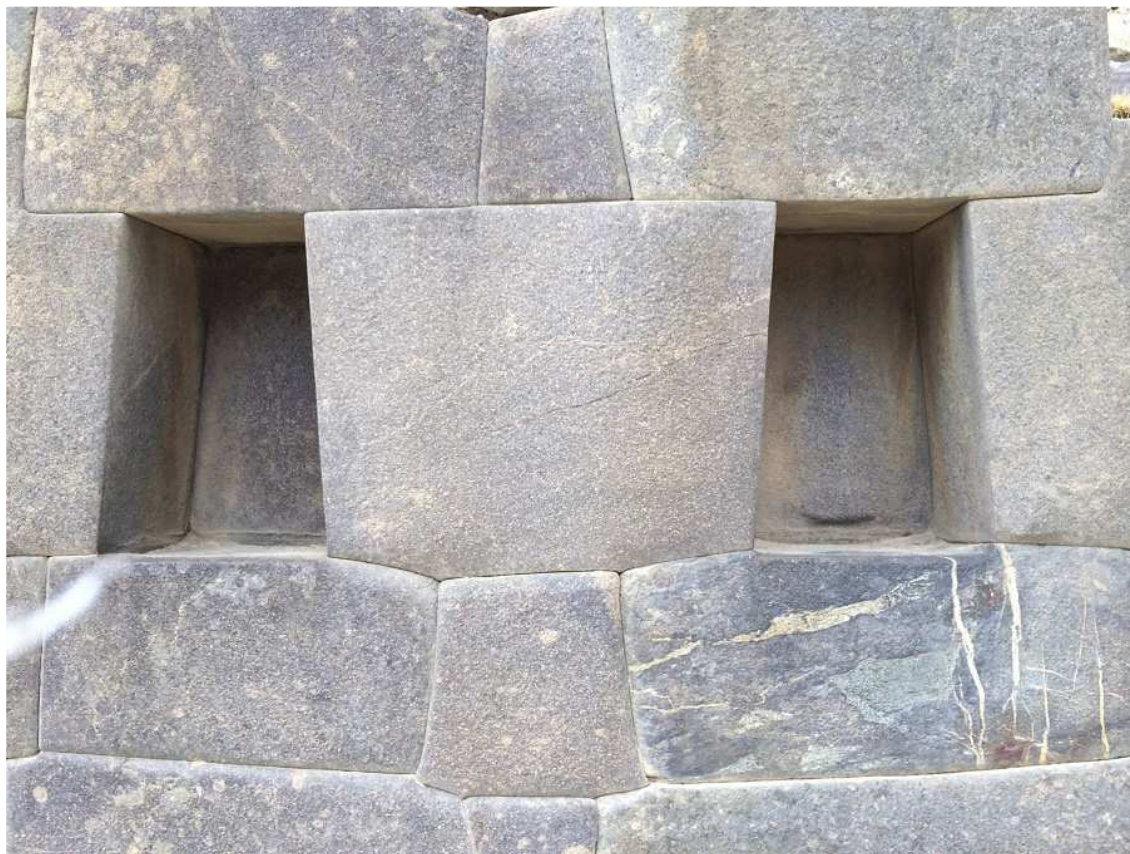

Фото. 11. Храм десяти ниш, Ольянтайтамбо (А. Fuchs, 2008, sy-akka.de/wordpress). Обратите внимание на симметричное расположение блоков в кладке.

Преимущество реплики состоит в том, что по образцу (реплике) обрабатывается только одна из сопрягаемых поверхностей смежных блоков, исходная поверхность обрабатывается произвольно (независимо). В отличие от реплики в методе с пантографом необходимо по образцу (модели) обрабатывать обе сопрягаемые поверхности, произвольно обрабатываемых поверхностей нет.

#### **2.4. Основная проблема**

Что вынужден постоянно делать каменщик при изготовлении блоков, стыкующихся друг с другом по сложному профилю? Каменщик вынужден постоянно прикладывать один камень к другому, чтобы определять места, где следует удалить лишний материал. Когда камни небольшие, сделать это не сложно.<sup>6</sup> Но, как это сделать, когда вес камней составляет сотни килограмм и тонны? Предложенные способы как раз и позволяют решить данную проблему – многократно перемещать тяжёлый ответный блок более не требуется.

#### **2.5. Зачем ещё была нужна глиняная модель объекта?**

Всегда крайне полезно:

- иметь небольшую модель объекта, состоящего из множества деталей сложной формы, соединяемых друг с другом сложным образом;
- покрутить каждый блок в руках;
- точнее оценить пропорции;
- править блоки, если что-то не понравилось в их форме или сопряжении;
- собирать/разбирать модельную стену, чтобы проверить принципиальную возможность сборки объекта, содержащего замковые элементы;
- собирать/разбирать модельную стену, чтобы проанализировать операции по перемещению, монтажу и установке тяжёлых каменных блоков;
- видеть заранее, как будет выглядеть объект после окончания строительства.



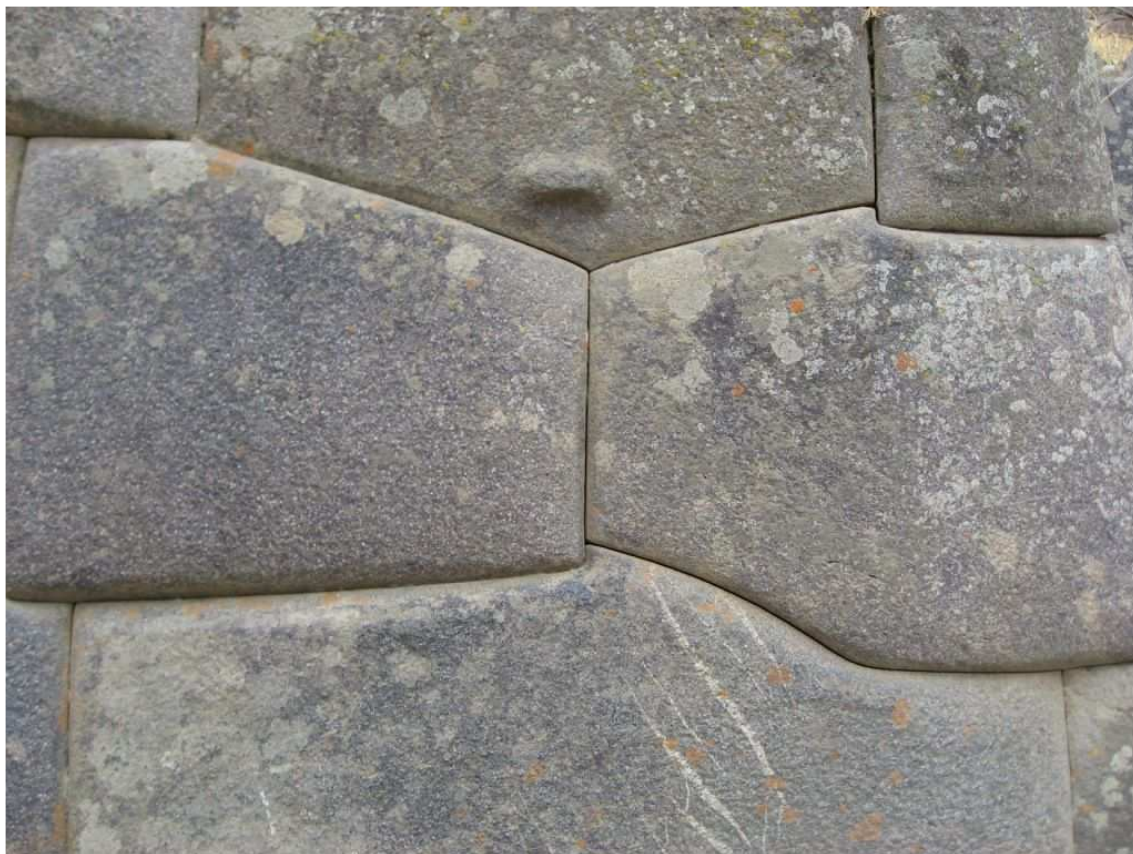

Фото. 12. Ольянтайтамбо (B. Everett, [www.facebook.com/barry.everett.3](http://www.facebook.com/barry.everett.3)).

Ведь у архитекторов и строителей в те времена не было компьютеров, чтобы поворачивать деталь в пространстве на экране монитора или, создав виртуальную реальность, побродить по задуманному объекту задолго до его постройки. Даже в наше время изготовление макетов в архитектуре и планировании не потеряло своей актуальности.

Как известно, регион, где использовалась полигональная кладка, является сейсмоопасным.<sup>2,3,4,5</sup> Поэтому, создав модель постройки с замковыми блоками и встряхнув её, можно было увидеть, как поведёт себя объект при землетрясении, после чего при необходимости внести в проект соответствующие исправления. Других способов тогда просто не существовало, расчёты были грубыми, а интуиция и опыт могли подвести.

Как было показано выше, и бетонные отливки, и глиняные модели имеют усадку. Усадка глины составляет 2-3%.<sup>37</sup> Следовательно, в обоих случаях между блоками полигональной кладки должны возникать связанные с усадкой зазоры. Тогда в чём же состоит преимущество глиняной модели? Дело в том, что при возникновении вызываемых усадкой зазоров в глиняной модели стены, зазоры эти всегда можно устранить, накладывая тонкие слои глины на глиняные модельные блоки там, где это требуется. При этом какие-либо требования к прочности и долговечности добавленных слоёв глины просто неприменимы, так как глиняная модель – это всего лишь вспомогательный элемент строительного процесса не испытывающий больших нагрузок, который выбрасывается после непродолжительного использования.

А вот покрывать тонким в несколько миллиметров слоем бетона отливку из бетона бесполезно, поскольку прочность сцепления этого слоя с отливкой будет недостаточно велика, и он очень скоро отвалится/разрушится под действием весовой нагрузки и погодных условий. На бетонную отливку можно наложить слой потолще, охватывающий всю поверхность отливки, а не отдельный участок (см. раздел 2.2). Такой слой будет держаться лучше, однако технология создания подобного слоя в строительстве является слишком сложной и дорогой.

Таким образом, признаками недавней постройки (отливки) и/или неудачной реставрации



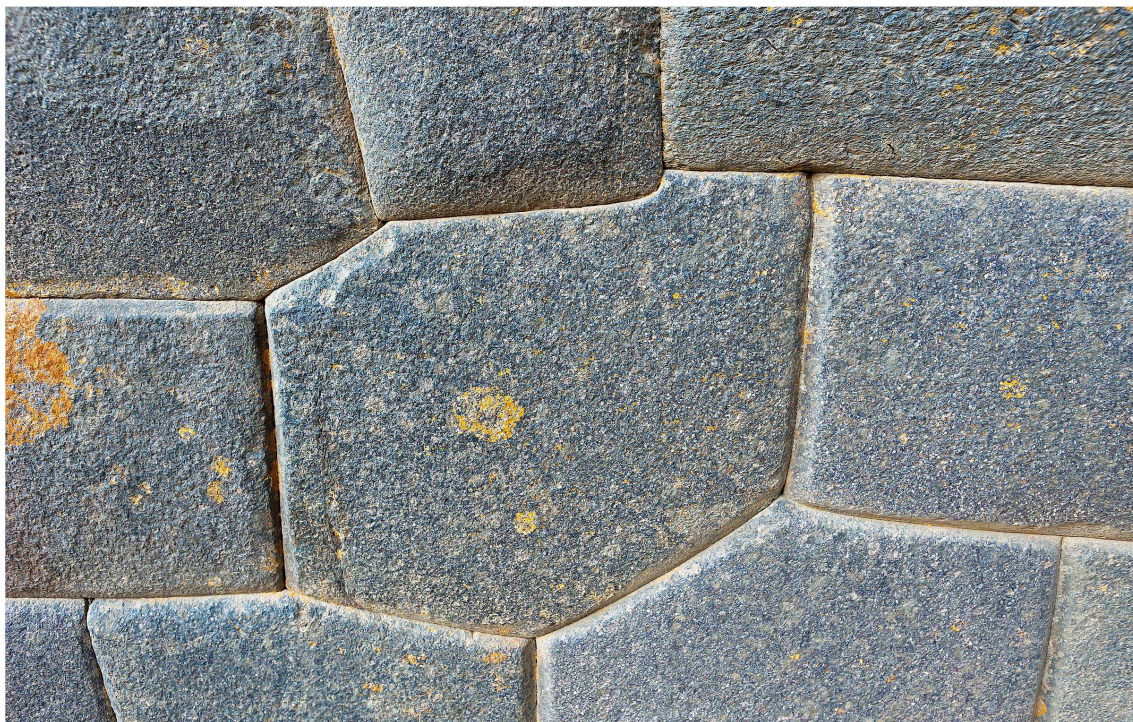

Фото. 13. Ольянтайтамбо (И. Отыкало, 2015, peru-info.me).

(крепость Саксайуаман, комплекс в Тараваси) являются: трещины в блоках, следы нанесения бетонного раствора, слоистая структура разрушенных блоков (включая так называемые “оплавленные” камни), большие зазоры между блоками и непараллельность этих зазоров, расползание блоков полигональной кладки, неполная разборность кладки.

На верхних гранях у ряда разобранных каменных блоков в Ольянтайтамбо обращают на себя внимание характерные L- и U-образные выемки под основания блоков, устанавливаемых сверху.<sup>6,11</sup> Некоторые из этих выемок охватывают два и даже три соседних блока, обеспечивая тем самым перевязку блоков. Данные выемки в соответствии с принципами устойчивого равновесия гарантируют возвращение блоков в исходное положение в случае их небольшого горизонтального смещения во время землетрясения. Рассматриваемые выемки в верхних гранях блоков и соответствующие им выступающие части в нижних гранях устанавливаемых сверху блоков закладываются на этапе лепки глиняной модели.

## **2.6. Каковы преимущества пантографа в сравнении с репликой?**

Когда мы прикладываем реплику к обрабатываемой протяжённой поверхности со сложным рельефом, мы не видим чётко, в каких местах и сколько материала следует удалить. Поэтому при работе с репликой приходится чем-то эту реплику окрашивать, скажем, мелком или угольком, и, приложив к обрабатываемому участку поверхности, слегка елозить, чтобы отметить места выборки материала камня. Вспомните, что делает стоматолог после пломбировки зуба. Он кладёт на пломбу кусочек копировальной (карбоновой) бумаги и просит, закрыв рот, чуть-чуть пожевать её зубами. После чего убирает немного материала пломбы в окрашенном месте. И так повторяет несколько раз, пока зубы при смыкании не займут правильное положение.

При работе с пантографом к глиняной модели прикладывается острый щуп (Pointer A), а к обрабатываемой поверхности заготовки подводится острый указатель (Pointer B), механически связанный со щупом посредством параллелограммного механизма. В отличие от реплики из-за малой площади щупа и указателя измерение рельефа фактически осуществляется в точке поверхности, причём, хорошо видно в какой именно, вся поверхность полностью открыта.

Более того, пантограф позволяет чётко определить толщину удаляемого материала в любой точке, на которую направлен указатель (см. также раздел 2.11.2). Следовательно,



убирать лишний материал можно за существенно меньшее число попыток. Всё это ведёт к резкому росту производительности. Наибольшая производительность достигается при работе на пантографе двух человек. Один указателем пантографа показывает место (точку) на каменной заготовке и называет толщину удаляемого в этом месте материала, а другой с помощью молотка и зубила убирает указанное количество материала.

Другим преимуществом пантографа в сравнении с репликой является то, что касаться практически невесомым щупом (устройство сбалансировано противовесом) глиняной модели блока значительно быстрее и легче, чем прикладывать сравнительно тяжёлую реплику к каменной заготовке, и затем этой репликой ещё немножко елозить.

Также пантограф позволяет легко выдерживать задаваемые архитектором пропорции, что при применении реплик придётся делать на глазок, долго подбирая заготовки подходящих размеров. Представьте, что вам требуется точно вписать постройку в какой-то неизменяемый или трудно изменяемый габарит, скажем, между двумя скальными выходами или в пещеру. Для этого достаточно измерить расстояние между скальными выходами и размер модели, после чего разделить первое на второе, и полученный коэффициент увеличения задать в пантографе.

Что ещё даёт использование глиняных модельных блоков и пантографа? Пусть требуется внешнюю сторону стены изготовить с наклоном. Для этого достаточно положить сырую глиняную модель стены на тыльную сторону, установить упоры, задающие необходимый наклон, сверху на лицевую сторону положить плоский щит, на котором разместить подходящего веса грузы. Вместо грузов можно использовать стягивающие струбины. Через некоторое время глиняная модель стены деформируется должным образом. Заданный угол в таком способе можно выдерживать очень точно на всём протяжении стены.

## **2.7. Обратный подход: создание глиняной модели по каменной заготовке, формирование поверхности сопряжения и её перенос на каменную заготовку**

Выше описывался способ, при котором вначале по эскизу создавалась глиняная модель, а затем под каждый блок модели подбиралась каменная заготовка. Такой способ позволяет повторять много раз участок стены (при необходимости в разном масштабе), используя каждый раз одну и ту же глиняную модель (см. возможный пример подобной кладки в 46). Недостатком способа является большой объём скальываемого материала каменной заготовки. Анализ показывает, что в основном для полигональной кладки использовали обратный способ.

В обратном способе сначала по имеющейся каменной заготовке произвольной формы с помощью 3D-пантографа создаётся её уменьшенная глиняная модель. Для этого кусок сырой глины насаживается на заострённый, скажем, трёх/четырёхгранный металлический штырь, расположенный в центре предназначенной для модели поворотной платформы (Table A на Рис. 2). Благодаря такому штырю модель в любой момент можно снимать с пантографа и точно возвращать на прежнее место.

Как и прежде глиняная модель и каменная заготовка располагаются в пантографе тыльными сторонами вниз. Исключение составляют элементы стены, образующие внешний угол. Эти элементы следует располагать на поворотных платформах пантографа лицевой стороной вниз, чтобы обеспечить доступ к обрабатываемым нижней, верхней и боковым граням. Для установки на платформе пантографа глиняной модели углового элемента на её лицевой поверхности вокруг отпечатка штыря следует изготовить опорную плоскость подходящей площади. Для фиксации на платформе пантографа каменной заготовки углового элемента используются клинящие камни. Обработку лицевой поверхности угловых каменных блоков удобнее выполнять после окончательной сборки примыкающих к ним стен.

В тех местах модели, где глины не хватает, она добавляется. Удаление излишков глины выполняется непосредственно металлическим указателем пантографа (Pointer A на

Рис. 2; вместо острия на указателе можно закрепить подходящий инструмент, например, проволочную петлю, резец, скребок и т. п.), щуп которого (Pointer B) движется по поверхности каменного блока заготовки вертикально то вверх, затем небольшой поворот платформы с заготовкой (Table B) вокруг вертикальной оси, то вниз, снова небольшой поворот, снова вверх и т. д.<sup>26</sup> Благодаря пантографу создание основы глиняной модели по каменной заготовке не занимает много времени.

На следующем этапе из полученных глиняных модельных блоков складывают прототип стены. Блоки пока не имеют специально изготовленных посадочных поверхностей. Исходя из размеров и формы блоков, каждому блоку в прототипе стены определяется его местоположение. Архитектор-строитель приблизительно размечает на глиняной модели стены контуры будущих сопряжений, которые должны: отражать задуманный стиль, обеспечивать устойчивость создаваемой полигональной кладки, минимизировать затраты труда на обработку посадочных поверхностей. Далее согласно выполненной разметки глина выбирается в тех местах модельных блоков, которыми они будут примыкать друг к другу.

Теперь из полученных модельных блоков собирается модель стены. Небольшими правками блоки точнее досопрягаются друг с другом. Если в ходе манипуляций модель блока случайно испортили, то форму модели в любом её месте всегда можно восстановить, поместив модель блока обратно в пантограф (на указанный выше штырь) и сравнив с формой исходной каменной заготовки. Далее стена сушится. В начале сушится нижний ряд, затем следующий за ним и т. д. В процессе сушки-усадки модельные блоки досопрягаются более точно под собственным весом и с небольшими правками строителя. Если в результате усадки между модельными блоками возникает зазор, то этот зазор устраняется нанесением на модельные блоки в месте их стыковки слоёв глины соответствующих толщин.

На последнем этапе модельную стену разбирают. Глиняную модель блока устанавливают обратно в пантограф (на указанный выше штырь) и с помощью молотка и зубила переносят посадочные места на соответствующую этому модельному блоку каменную заготовку.

В описанном способе каменный блок устанавливается в пантограф, по меньшей мере, дважды. Для того чтобы можно было точно вернуть каменный блок на прежнее место, на платформу (Table B) следует нанести, например, две линии, радиально расходящиеся из её центра. При первой установке каменного блока в местах, где такие линии выходят из-под блока, на поверхности камня краской наносятся риски совмещения. Если стена не является подпорной, то окончательную обработку её поверхности, образуемую тыльными сторонами каменных блоков, удобнее выполнять после сборки стены.

### **2.8. Ещё несколько преимуществ пантографа**

Использование уменьшенной глиняной модели и пантографа позволяет изготавливать блоки прямо в карьере, где происходит добыча камня.<sup>6,11</sup> В результате из карьера на стройплощадку доставляются уже готовые каменные блоки. Данный подход заметно уменьшает вес транспортируемых блоков и объём перевозок в целом. Кроме того, при такой организации на стройплощадке не возникает большого количества строительного мусора, который тоже потом нужно куда-то транспортировать с места строительства.

И в способе с пантографом, и в способе с репликами используются вспомогательные элементы. В способе с пантографом это глиняные модельные блоки, в способе с репликами – это сами реплики. Для стыковки каменных блоков в способе с репликами боковая поверхность блока должна быть разбита на несколько перекрывающихся участков, для каждого из которых требуется своя реплика. Если теперь мысленно приставить к боковой поверхности некраевого каменного блока все сделанные для него и по нему реплики, то получится некое подобие колеса, т. е. достаточно массивное образование. Если исполь-



зуется реплика реплики, то таких “колёс” будет уже два. Таким образом, в методе реплика реплики для каждого некраевого блока потребуется изготовить по одному “колесу” из реплик. Давайте теперь сравним такое “колесо” из реплик с небольшими модельными блоками в методе, базирующемся на пантографе. Преимущества пантографа очевидны.

## **2.9. Способ, сочетающий элементы способов реплики, глиняной модели и пантографа**

Вначале на месте будущей постройки устанавливается каждый второй каменный блок первого ряда (см. Рис. 3). Пустые места между этими блоками займут каменные блоки, которые на следующем этапе будут подгоняться по месту под эти первоначально установленные блоки с использованием полноразмерной глиняной модели и 3D-пантографа. Высоты каменных блоков, устанавливаемых между первоначальными блоками, должны приблизительно в 2 раза превосходить высоты первоначальных блоков. Поверхности оснований первоначально установленных каменных блоков предварительно обрабатываются должным образом для придания им устойчивости.

Помимо подготовленного основания первоначально установленные блоки также имеют окончательно обработанные боковые грани. Обработка боковых граней представляет собой спрямление с помощью молотка и зубила сложной исходной формы каменной заготовки близкими к плоскостям поверхностями. Наклоны боковых граней первоначально установленных блоков к основаниям этих блоков по возможности не должны превосходить  $90^\circ$ , чтобы облегчить последующую установку примыкающих блоков. Аналогичное правило распространяется далее для каждого второго блока последующих рядов полигональной кладки.

Теперь пространство между первоначально установленными блоками заполняется глиной. Фактически в промежутках между первоначальными блоками создаются глиняные модели блоков в масштабе 1:1. Боковые поверхности этих моделей, контактирующие слева и справа с боковыми поверхностями первоначальных блоков, по сути, являются их репликами. Для облегчения полноразмерных глиняных моделей и уменьшения усадочных деформаций во время сушки модели выполняются пустотелыми. Если в результате усадки между первоначальным каменным блоком и глиняной моделью возникает зазор, то он устраняется нанесением на глиняную модель слоя сырой глины подходящей толщины.

После сушки глиняная модель блока извлекается из постройки и устанавливается в пантограф на место модели (Table A). На место копии (Table B) устанавливается соответствующая каменная заготовка. Пантограф настраивается на масштаб 1:1 (размещение модели и копии в пантографе при таком масштабе определяется только удобством работы). В случае необходимости с помощью пантографа можно быстро проверить насколько хорошо по размерам подходит выбранная каменная заготовка к данной модели.

Далее поверхности сопряжения с помощью пантографа, молотка и зубила переносят с полноразмерной глиняной модели на каменную заготовку так, как описывалось выше. После переноса поверхностей сопряжения формируют остальные (произвольные) грани на оставшейся боковой поверхности каменной заготовки. Обработка этих граней представляет собой спрямление сложной исходной формы каменной заготовки близкими к плоскостям поверхностями. В дальнейшем эти грани больше обрабатываться не будут. Полученный таким путём каменный блок окончательно устанавливают на своё место полигональной кладки.

Закончив первый ряд, аналогичным образом изготавливают следующий. В описанном способе, как и в ранее предложенных, используются каменные блоки произвольной формы. Способ обеспечивает хорошую вертикальную перевязку блоков и удовлетворительную горизонтальную. Поскольку в данном способе нет полноценной глиняной модели постройки, то, чтобы хорошо скомпоновать исходные каменные блоки и тем самым минимизировать количество скалываемого материала при обработке, каменные блоки желатель-

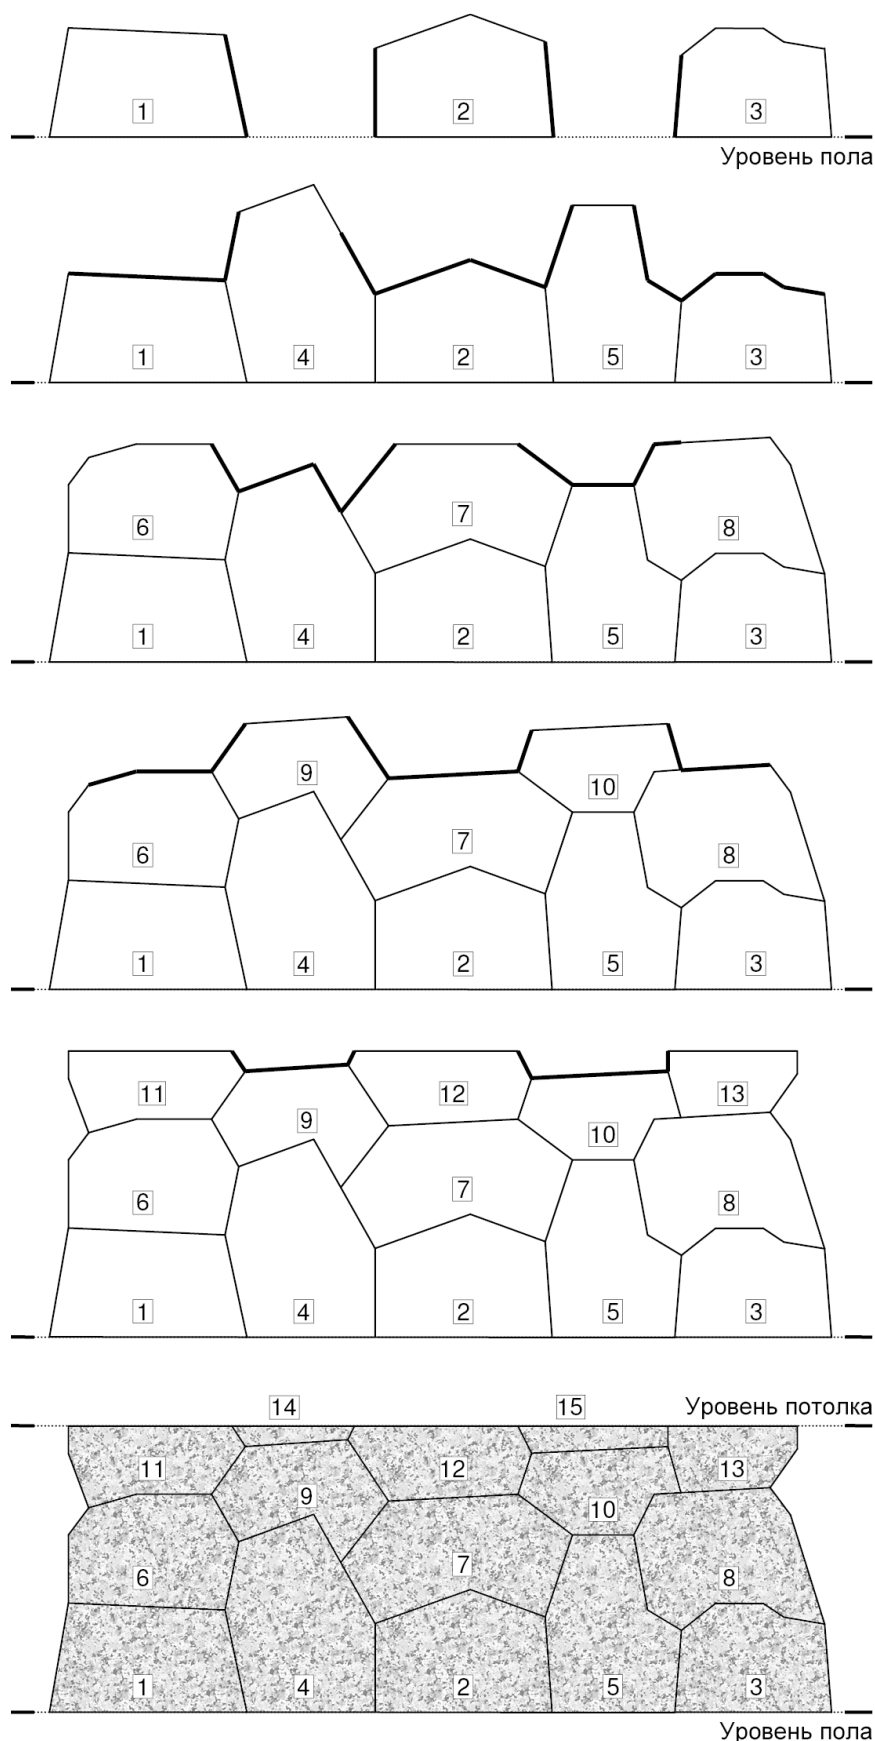

Рис. 3. Способ укладки полигональных блоков, сочетающий элементы способов реплики, глиняной модели и 3D-пантографа. Участки, по которым на каждом этапе выполняется сопряжение каменных блоков, показаны жирной линией. Цифры обозначают порядок установки блоков.

но предварительно выложить на земле тыльной стороной вниз один подле другого.

К недостатку способа следует отнести высокую трудоёмкость, связанную с изготовлением



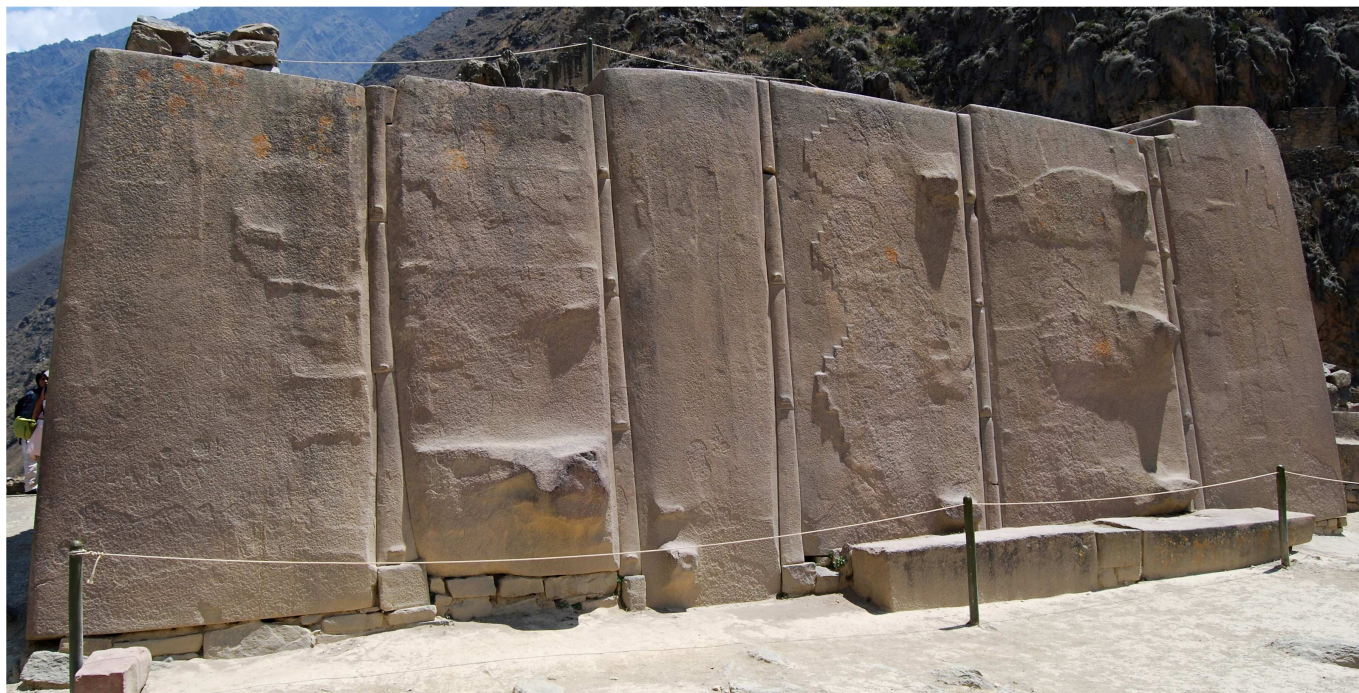

Фото. 14. Стена шести монолитов, Ольянтайтамбо (Р. Špindler, 2008, commons.wikimedia.org). Скорее всего, стена изготовлена с помощью способа, сочетающего элементы способов реплики, глиняной модели и 3D-пантографа. Небольшие камни в основании мегалитов указывают на то, что, по-видимому, стена когда-то пересобиралась, а возможно и была передвинута.

глиняной модели блока в масштабе 1:1. Тем не менее, в сравнении со способом реплики реплики, данный способ в состоянии обеспечить заметно более высокую точность сопряжения контактирующих поверхностей, когда таковая необходима. Как и в случаях с репликами, примерно половина боковой поверхности каменных блоков в данном способе обрабатывается произвольно.

Состоящая условно из одного ряда “Стена шести монолитов” в Ольянтайтамбо (см. Фото. 14), вероятнее всего, была изготовлена согласно описанному способу. Оставив пока в стороне архитектурный вид памятника, зададимся вопросом: Почему монолиты не сомкнуты друг с другом непосредственно, а требуют промежуточных вставок? Дело в том, что использование реплик на столь протяжённых участках контакта боковых поверхностей монолитов не в состоянии обеспечить получение нулевого зазора. Поэтому для соединения монолитов понадобились промежуточные вставки.

Чтобы подчеркнуть гигантские размеры монолитов, вставки должны существенно отличаться от монолитов по ширине. Так как изготовление и установка единой узкой, высотой с монолит вставки технологически ещё более сложная задача, чем непосредственное сопряжение соседних монолитов, то промежуточные вставки были разбиты на 3-5 отдельных частей. Каждая вставка изготавливалась по месту и устанавливалась последовательно друг за другом – вначале ряд (условный) из самых нижних, затем следующий ряд вставок, и т. д. Часть промежуточных вставок опускалась в ходе сборки стены на своё место сверху вниз, часть устанавливалась с лицевой или тыльной стороны стены.

Следует обратить внимание на небольшие камни, на которых покоятся монолиты. Камни эти обеспечивают выборку боковых зазоров между монолитами и самыми нижними узкими вертикальными вставками (см. раздел 2.1). Однако рассмотренный метод сопряжения блоков не нуждается в такой регулировке положения, так как изготовление промежуточных вставок в нём выполняется по месту. Отсюда следует, что “Стена шести монолитов” когда-то пересобиралась и возможно изначально располагалась в другом месте. Необходимость в пересборке могла возникнуть из-за недостаточно тщательной подготовки основания монумента или в связи с расползанием блоков вследствие землетрясения и т. п.



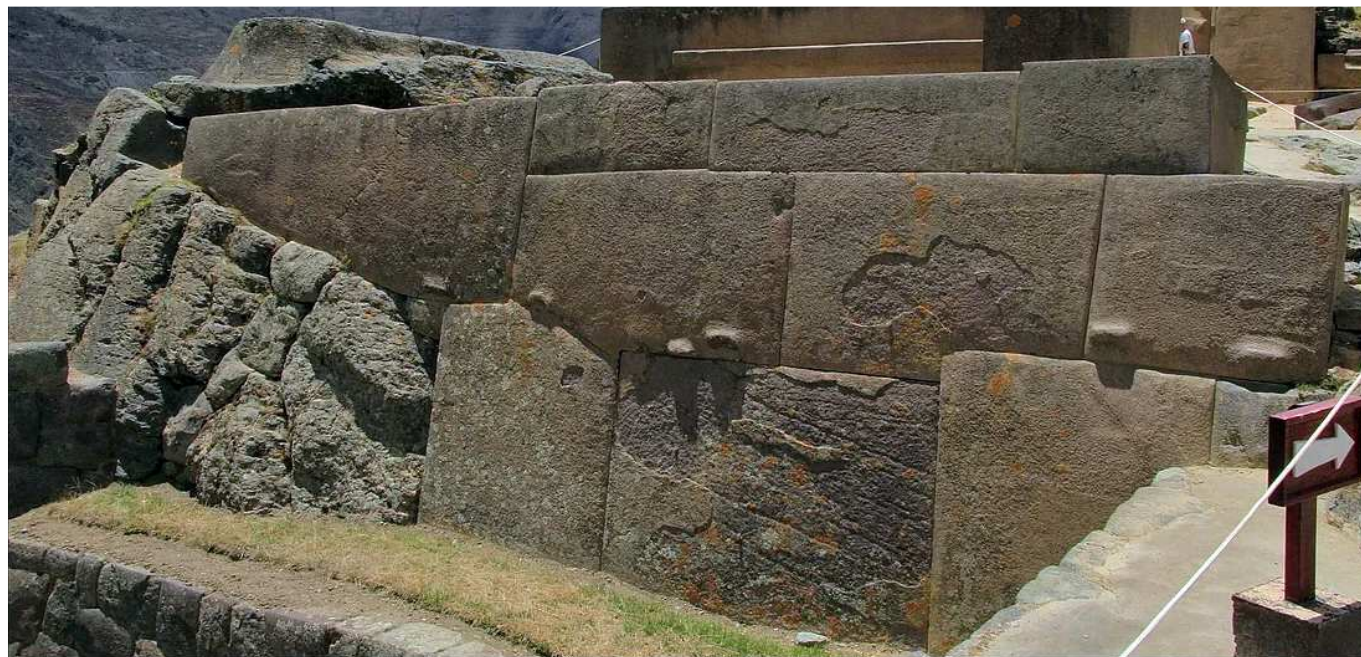

Фото. 15. Ольянтайтамбо (Е. Берзин, 2019, [allenatore.livejournal.com](https://www.livejournal.com)).

На заключительном этапе строительства, по всей видимости, небольшие камни в основании пересобранного памятника должны были скрываться уровнем пола.

### **2.10. “Планетарный” пантограф для использования в строительстве**

Современные 3D-пантографы, используемые скульпторами, имеют две синхронно поворачивающиеся платформы. На одной платформе (см. Table A на Рис. 2) установлена модель, на другой (Table B) – её увеличенная копия. Обычно увеличенная копия – пустотелая, от чего вес копии, как правило, невелик. Усиленная платформа такого пантографа при применении его в строительстве способна выдержать каменные заготовки весом до 700 кг.

Когда скульптура имеет большие размеры и большой вес, её модель можно разделить на несколько частей. Для каждой такой части можно изготовить её увеличенную каменную копию, после чего из полученных увеличенных копий частей собрать одну большую скульптуру. По-видимому, полигональные Лица-башни камбоджийского храмового комплекса Ангкор<sup>47</sup> были изготовлены по данной технологии (см. Фото. 16). Но это не наш случай. В отношении Лиц-башен стоит отметить то, что они обладают симметрией, что, в свою очередь, может указывать на использование 3D-пантографа для их изготовления (см. раздел 3.8).

Современный 3D-пантограф для работы с большими и тяжёлыми заготовками не подходит. Вместо существующей конструкции можно предложить следующий “планетарный” пантограф. Тяжёлая заготовка в таком пантографе устанавливается просто на ровную площадку, а рама, к которой крепятся стрела пантографа и платформа с моделью, поворачивается в процессе работы в горизонтальной плоскости вокруг неподвижно стоящей заготовки. По мере поворота рамы модель также поворачивается вокруг своей вертикальной оси на необходимый угол (фактически сохраняет исходную ориентацию в пространстве) с помощью соответствующего механизма. Одному обороту точки опоры (Pivot на Рис. 2) стрелы пантографа вокруг неподвижной заготовки соответствует один оборот модели вокруг своей оси.

В отличие от существующего пантографа планетарный пантограф занимает больше места, а использующий пантограф человек вынужден перемещаться по мере работы вместе с поворачивающейся рамой вокруг заготовки. Эти особенности можно отнести к недостаткам планетарного пантографа, которые, впрочем, вовсе не критичны в строительном деле.



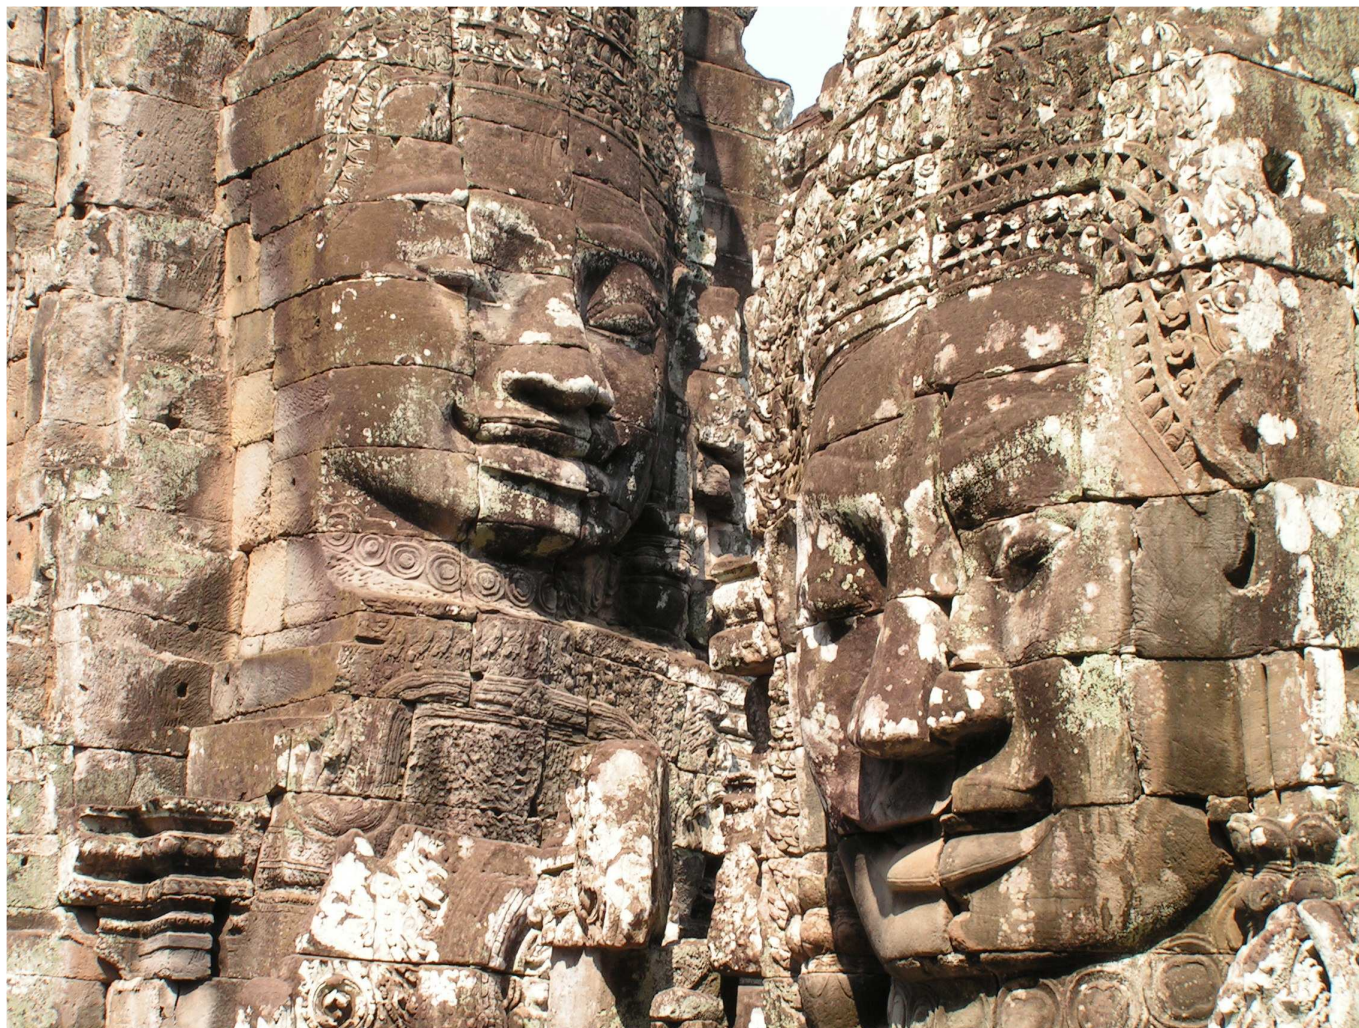

Фото. 16. Полигональные Лица-башни храмового комплекса Ангкор, Камбоджа (D. Wilmot, 2005, [www.flickr.com/photos/david\\_wilmot](http://www.flickr.com/photos/david_wilmot)). Согласно предлагаемой технологии уменьшенная глиняная модель Лица-башни состояла из множества частей, образующих полигональную кладку. Для каждой части глиняной модели с помощью 3D-пантографа изготавливалась её увеличенная каменная копия. Лицо-башня собиралась из увеличенных каменных копий этих частей. Лица-башни обладают симметрией, что также может говорить в пользу применения 3D-пантографа для их изготовления.

### **2.11. Транслятор рельефа на основе двойного параллелограммного механизма**

Можно предложить несложное механическое приспособление – транслятор рельефа (см. Рис. 4), с помощью которого в случае сравнительно простой полигональной кладки возможно выполнить вполне качественную стыковку поверхностей смежных каменных блоков по месту. Для обработки данным приспособлением оба сопрягаемых каменных блока кладутся на землю тыльной стороной. Соответственно, подвергаемые обработке основание, верхняя сторона и боковые поверхности блоков располагаются в данном способе вертикально.

Вначале, обработке (произвольной) подвергается сопрягаемый участок поверхности первого блока. В ходе обработки поверхность на этом участке делается плавно изменяющейся, близкой к плоскости. Такая поверхность получается, когда каменщик вручную, “на глазок” изготавливает плоскую поверхность, никак не контролируя отклонение обрабатываемой поверхности от плоскости.

Затем рядом с первым блоком устанавливают второй каменный блок. Второй каменный блок размещают так, чтобы совмещаемые участки поверхности оказались напротив друг друга. Расстояние между блоками задаётся таким (60-80 см), чтобы между блоками мог поместиться каменщик, который без особого стеснения был бы в состоянии работать мо-

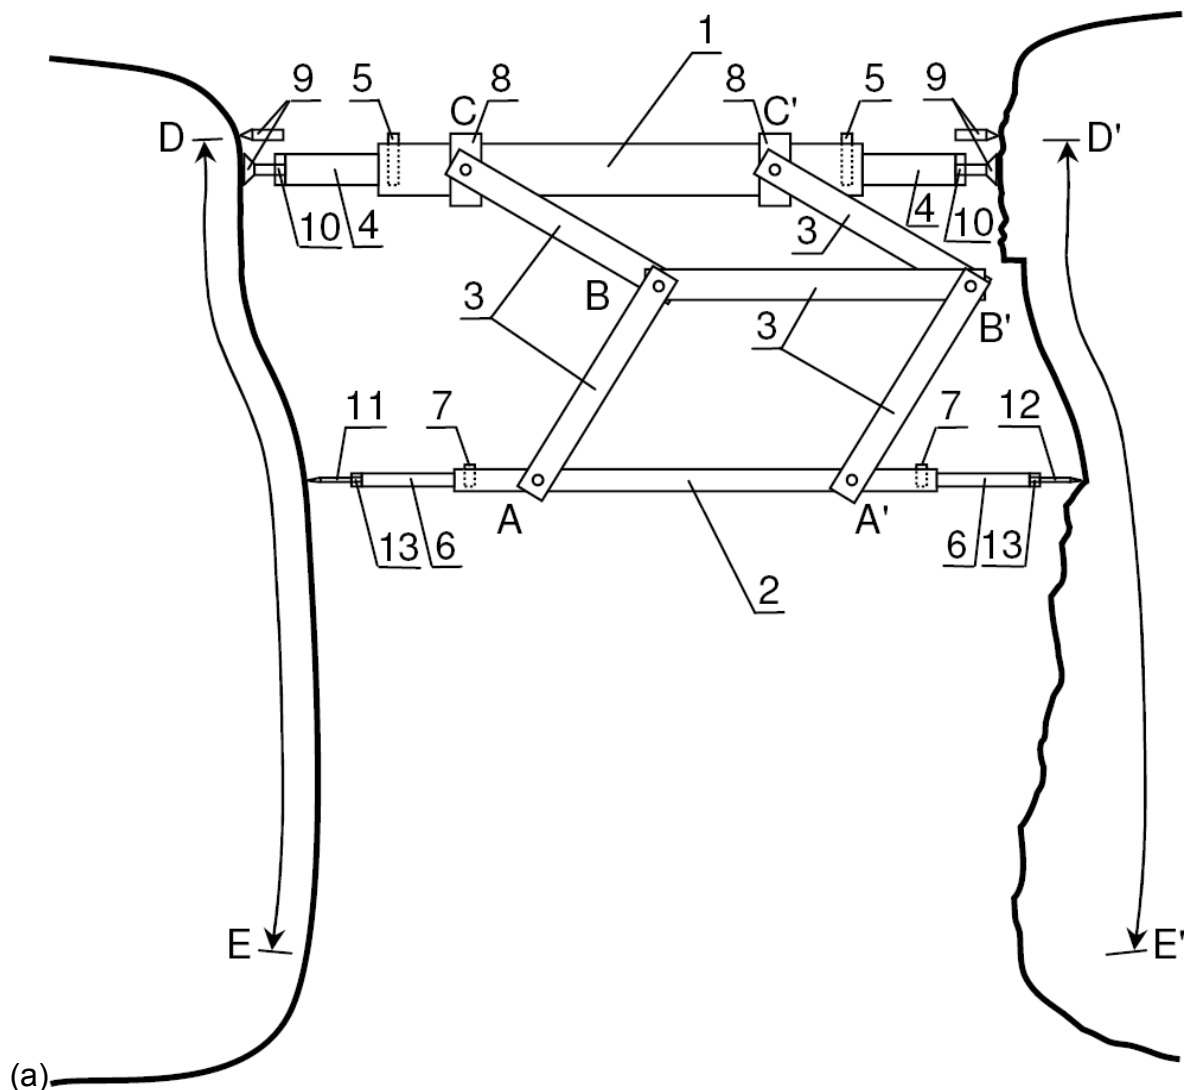

Рис. 4. Транслятор рельефа: 1 – несущий стержень; 2 – измерительный стержень; 3 – двойной параллелограммный механизм ( $AB=A'B'=BC=B'C'$ ,  $AA'=BB'=CC'$ ); 4 – выдвижные секции для грубой установки длины несущего стержня; 5 – штифты, фиксирующие положения выдвижных секций несущего стержня; 6 – выдвижные секции для грубой установки длины измерительного стержня; 7 – штифты, фиксирующие положения выдвижных секций измерительного стержня; 8 – цилиндрические шарниры, обеспечивающие свободное вращение измерительного стержня вместе с двойным параллелограммным механизмом вокруг несущего стержня; 9 – опоры (с заострением или с плоской подошвой) несущего стержня, вывинчивая которые несущий стержень крепится в распор между двумя сопрягаемыми каменными блоками; 10 – контргайки, фиксирующие положения опор несущего стержня; 11 – щуп измерительного стержня; 12 – указатель измерительного стержня; 13 – контргайки, фиксирующие положение щупа и указателя измерительного стержня; 14 – цилиндрические шарниры, обеспечивающие свободное вращение измерительного стержня вокруг своей оси; DE – произвольно-обработанный участок боковой поверхности предыдущего каменного блока; D'E' – обрабатываемый с использованием транслятора участок боковой поверхности текущего каменного блока. Установка несущего стержня в распор между блоками (а) перпендикулярно сопрягаемым поверхностям на опоры с плоской подошвой, (б) под углом к сопрягаемым поверхностям на опоры с заострениями. (б) Транслятор с дополнительными шарнирами 14, изогнутым щупом 11 и изогнутым указателем 12 для работы с U-образными выемками.

лотком и зубилом в пространстве между этими блоками. Далее между блоками в распор устанавливается предлагаемый транслятор рельефа, с помощью которого каменщик переносит на второй блок обращенный рельеф ранее обработанного участка поверхности первого блока.



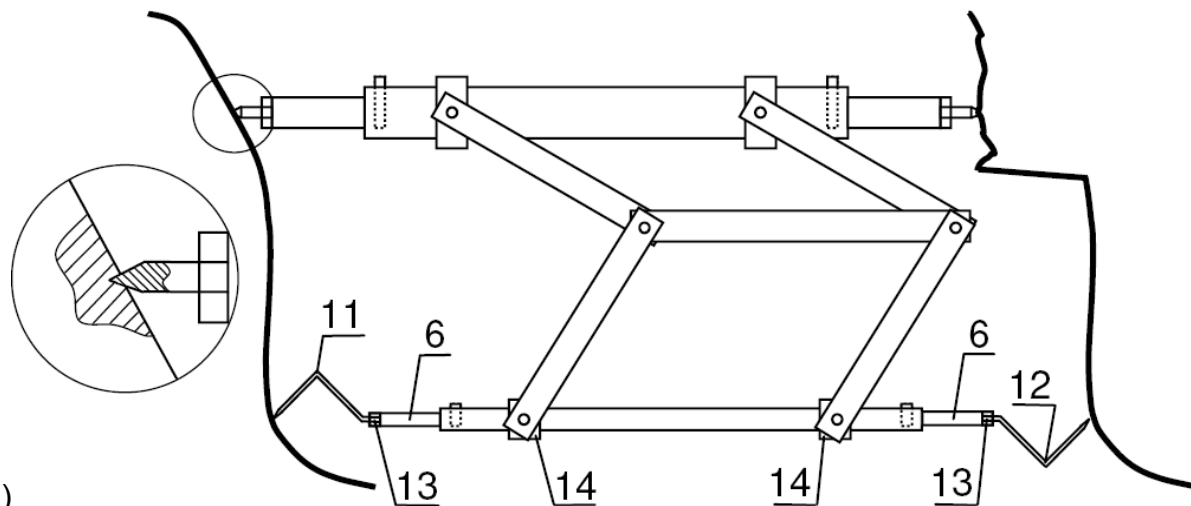

(б)

Рис. 4. Продолжение.

В целом, боковая поверхность каменного блока представляет собой совокупность указанных условно-плоских участков поверхности. Условно-плоские участки могут примыкать друг к другу, образуя резкую границу, либо они могут переходить друг в друга плавно, образуя ответные части L-образных выемок. U-образные выемки сводятся к паре расположенных встречно L-образных выемок. Опишем далее более подробно сам транслятор и построенную на его применении последовательность обработки каменных блоков.

### 2.11.1. Конструкция транслятора рельефа

Транслятор рельефа представляет собой два параллельных стержня, соединённых друг с другом посредством двойного параллелограммного механизма (см. Рис. 4). Двойной параллелограммный механизм относится к шарнирно-рычажным направляющим механизмам, имеет две степени свободы и состоит из семи звеньев таких, что  $AB=A'B'=BC=B'C'$  и  $AA'=BB'=CC'$ .<sup>24</sup> В рассматриваемом трансляторе тела стержней являются частью двойного параллелограммного механизма. Стержень с большим поперечным сечением будем называть несущим, стержень с меньшим поперечным сечением будем называть измерительным. Благодаря телескопическому или иному сочленению, длины стержней можно грубо изменять, сдвигая и раздвигая краевые секции вдоль стержня. По окончании грубой регулировки длин стержней относительные положения краевых секций фиксируются с помощью штифтов.

В концы несущего стержня вкручены наконечники-опоры, вывинчивая которые стержень транслятора надёжно закрепляется в распор на обрабатываемом участке между сопрягаемыми каменными блоками. В оба конца измерительного стержня вкручены наконечники-заострения. Заострение, направленное на предварительно обработанную поверхность первого блока, будем называть щупом; а заострение, направленное на обрабатываемую поверхность второго блока, будем называть указателем. Путём закручивания/выкручивания снабжённых резьбой заострений обеспечивается точное задание длины / измерительного стержня. Выставленные положения опор и заострений фиксируются контргайками.

Если несущий стержень устанавливается в распор между блоками перпендикулярно сопрягаемым поверхностям, то используются опоры с плоской подошвой (см. Рис. 4а). Если несущий стержень устанавливается в распор с заметным наклоном к сопрягаемым поверхностям, то используются опоры с заострениями (см. Рис. 4б). В последнем случае перед установкой несущего стержня в местах установки опор изготавливаются небольшие выемки в камнях. Выемки необходимы для исключения соскальзывания опор несущего стержня.

Поскольку транслятор должен передавать пространственный рельеф поверхности, а двойной параллелограммный механизм имеет только две степени свободы, то крепление

параллелограммного механизма к несущему стержню выполнено через цилиндрические шарниры. Таким образом, благодаря цилиндрическим шарнирам несущего стержня, измерительный стержень вместе с двойным параллелограммным механизмом может свободно вращаться вокруг несущего стержня. Такое вращение обеспечивает возможность “считывания” переносимого рельефа щупом измерительного стержня вокруг места установки несущего стержня.

### **2.11.2. Порядок работы с транслятором рельефа**

Если несущий стержень транслятора устанавливается рядом с тем местом, где расстояние между блоками наибольшее, то наибольшее расстояние задаётся в измерительном стержне по месту, и работа по переносу рельефа начинается с этого места. В целом несущий стержень может быть установлен в любом удобном для каменщика месте. На практике часто бывает удобнее установить несущий стержень ближе к краю блока, и перенос (трансляцию) рельефа начинать от края блока.

После установки несущего стержня и задания требуемой длины измерительного стержня, кончик щупа измерительного стержня прикладывается к предварительно обработанной поверхности первого каменного блока (показан на рисунке слева). В результате, кончик указателя измерительного стержня покажет место на ответной обрабатываемой поверхности второго блока (показан на рисунке справа), где каменщику следует сколоть материал.

Для того чтобы каменщику было видно, сколько материала следует сколоть в данном месте, указатель транслятора делают утапливаемым в выдвижную секцию измерительного стержня, подпружинивают, снабжают шкалой и индикатором (перечисленные элементы на рисунке не показаны). Аналогичное устройство указателя может использоваться и в конструкции 3D-пантографа. Таким образом, располагая информацией о количестве удаляемого материала в каждой точке поверхности, каменщик выполняет работу за меньшее число скалываний, что заметно повышает его производительность.

Наибольшая производительность достигается при работе с транслятором двух человек. Один указателем транслятора показывает место (точку) на обрабатываемом каменном блоке и называет толщину удаляемого в этом месте материала, а другой с помощью молотка и зубила убирает указанное количество материала.

Основная задача двойного параллелограммного механизма состоит в обеспечении строгой параллельности перемещения измерительного стержня. Из приведённого описания видно, что рассматриваемый транслятор на отдельном сопрягаемом участке будет давать такой же результат, что и 3D-пантограф, настроенный на масштаб 1:1.

Точность работы транслятора определяется зазорами в шарнирах и изгибными деформациями конструктивных элементов механизма. Для обеспечения жёсткости конструкции используемые в параллелограммах рейки и шарниры имеют соответствующие размеры сечений и рёбра жёсткости (на рисунке не показаны). Для увеличения жёсткости конструкции помимо указанных параллелограммных механизмов могут использоваться дополнительные идентичные параллелограммные механизмы, присоединяемые как параллельно, так и последовательно (вдоль стержней).

Механизм транслятора имеет ограниченное пространство перемещения, представляющее собой цилиндр с радиусом  $2AB$  (осью цилиндра является несущий стержень). Поэтому при работе с большими блоками невозможно обработать всю сопрягаемую поверхность за одну установку транслятора. Кроме того, из-за конечных размеров реек параллелограммов, шарниров и самих стержней область в непосредственной близости вокруг места установки несущего стержня и в самом этом месте также оказывается недоступной для обработки (см. Рис. 4).

Таким образом, после обработки доступной измерительному стержню области сопрягае-



мой поверхности положение измерительного стержня фиксируется на краю обработанного участка в распор путём небольшого вывинчивания из стержня щупа и/или указателя (утапливаемый указатель при этом блокируется отдельным штифтом). Если измерительный стержень достаточно лёгкий, а шарниры двойного параллелограмма не тугие, то фиксацию измерительного стержня можно выполнить за счёт сжатия пружины утапливаемого указателя на близлежащем ещё необработанном участке каменного блока. После этого, несущий стержень расфиксируется и переносится параллельно зафиксированному в пространстве измерительному стержню в новую позицию, где опять фиксируется в распор. Наконец, измерительный стержень расфиксируется, и работа продолжается на новом участке каменного блока, примыкающем к предыдущему.

Чтобы установкой измерительного стержня в распор не сбивать заданную длину измерительного стержня и не тупить его щуп и указатель, можно после выведения измерительного стержня к краю диапазона перемещения транслятора просто пометить краской место, которого касается щуп, и место, на которое смотрит указатель. После этого несущий стержень можно расфиксировать, перенести и установить опорами на места, помеченные краской. Заметим, что, располагая рядом таких отметок и используя транслятор уже в качестве прибора контроля, всегда можно точно вернуть каменные блоки на прежнее место для продолжения обработки, если перед этим они перемещались по каким-либо причинам. Необходимую фиксацию положений каменных блоков в пространстве обеспечивают установкой небольших клинящих камней между тыльными сторонами блоков и грунтом.

Описанный выше процесс переноса рельефа показывает, что, если снабдить несущий стержень такими же заострениями, как и у измерительного стержня, а измерительный стержень сделать таким же толстым, как и несущий стержень, а также снабдить измерительный стержень такими же цилиндрическими шарнирами (поз. 14 на Рис. 4б), как и у несущего, то получим вариант исполнения транслятора симметричной конструкции, где нет разницы между несущим и измерительным стержнями. Такой транслятор может оказаться более удобным при его перемещении по обрабатываемой поверхности камня большой площади, однако будет иметь более тяжёлый и менее острый щуп-указатель.

Выше было описано сопряжение двух соседних блоков по одному участку. В следующем разделе будет продемонстрировано, каким образом с помощью предложенного транслятора могла создаваться полигональная кладка в целом.

### **2.11.3. Последовательность обработки транслятором каменных блоков в полигональной кладке**

Вначале обрабатываются каменные блоки, образующие первый ряд кладки. Для первого блока первого ряда берётся камень произвольной формы (см. Рис. 5, поз. 1), в котором формируют боковые грани (основание, верхняя сторона и боковые стороны) (поз. 2). Обработка боковых граней является произвольной – исходная неправильная боковая поверхность природного камня заменяется совокупностью приблизительно плоских граней. В дальнейшем эти грани больше обрабатываться не будут. Полученный в результате такой обработки блок кладётся на землю тыльной стороной (поз. 2). В последствии обработка, подгонка и проверка качества сопряжения соседних блоков будут осуществляться при данном положении блоков.

Для второго блока первого ряда берётся следующий камень произвольной формы, в котором изготавливают плоское основание. Затем блок размещают рядом с первым блоком так, чтобы основания блоков располагались примерно в одной вертикальной плоскости (поз. 3). Между блоками параллельно основаниям этих блоков устанавливают транслятор. После этого переносят рельеф с боковой грани первого блока на боковую грань второго блока (копируемый участок показан жирной линией).

## Способы изготовления полигональной кладки в мегалитических комплексах Перу

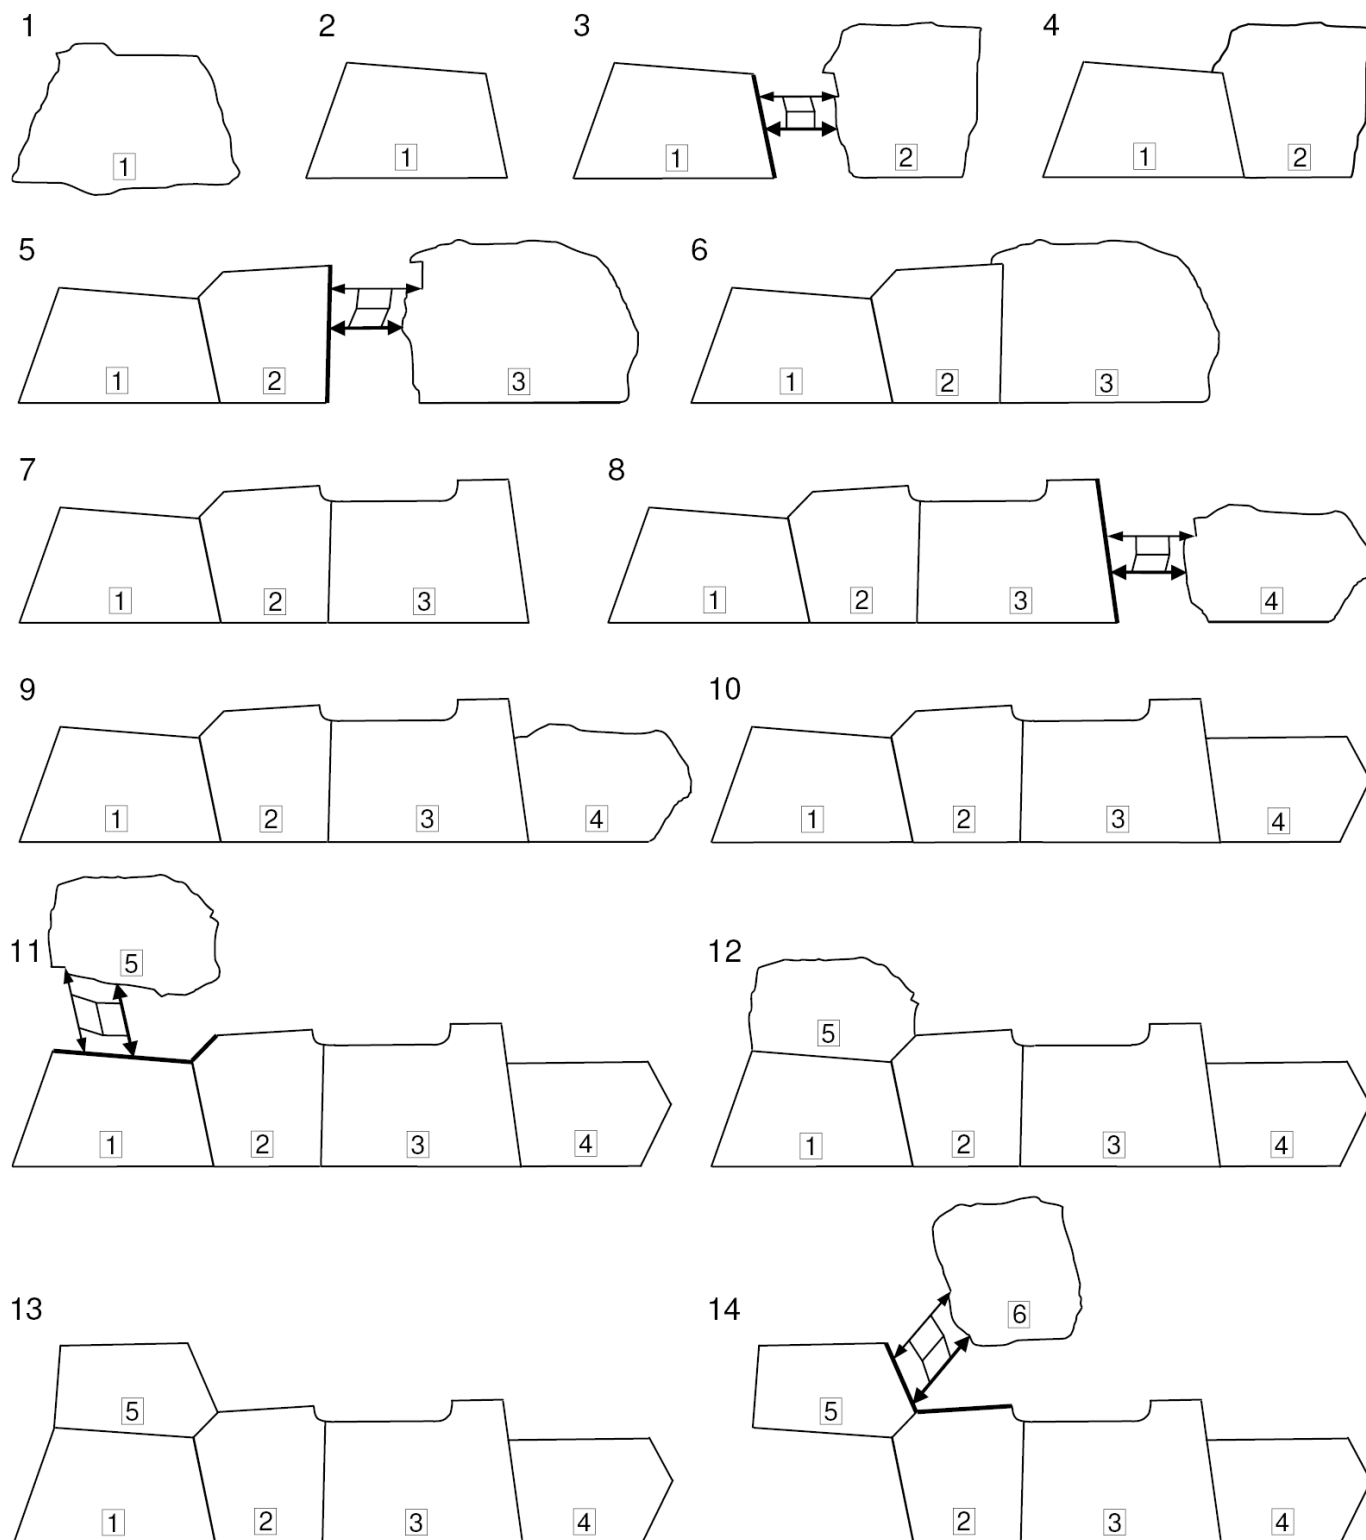

Рис. 5. Последовательность обработки каменных блоков с использованием транслятора рельефа. Полигональная кладка представлена восемью блоками, уложенными в два ряда по четыре блока в каждом ряду. Участки, по которым выполняется сопряжение каменных блоков, показаны жирной линией. За исключением позиции 22 каменные блоки лежат на земле тыльной стороной вниз. Транслятор изображен в упрощённом виде. Передвижения несущего стержня по обрабатываемой поверхности, связанные с исчерпанием диапазона действия транслятора, не показаны. Для переноса U-образных выемок, вместо прямолинейных в измерительный стержень вкручиваются изогнутые наконечники.

Если стыкуемые боковые стороны блоков перпендикулярны или почти перпендикулярны основаниям, то транслятор устанавливается на плоские опоры; иначе транслятор устанавливается на опоры с заострениями. Если стыкуемые боковые стороны блоков накло-



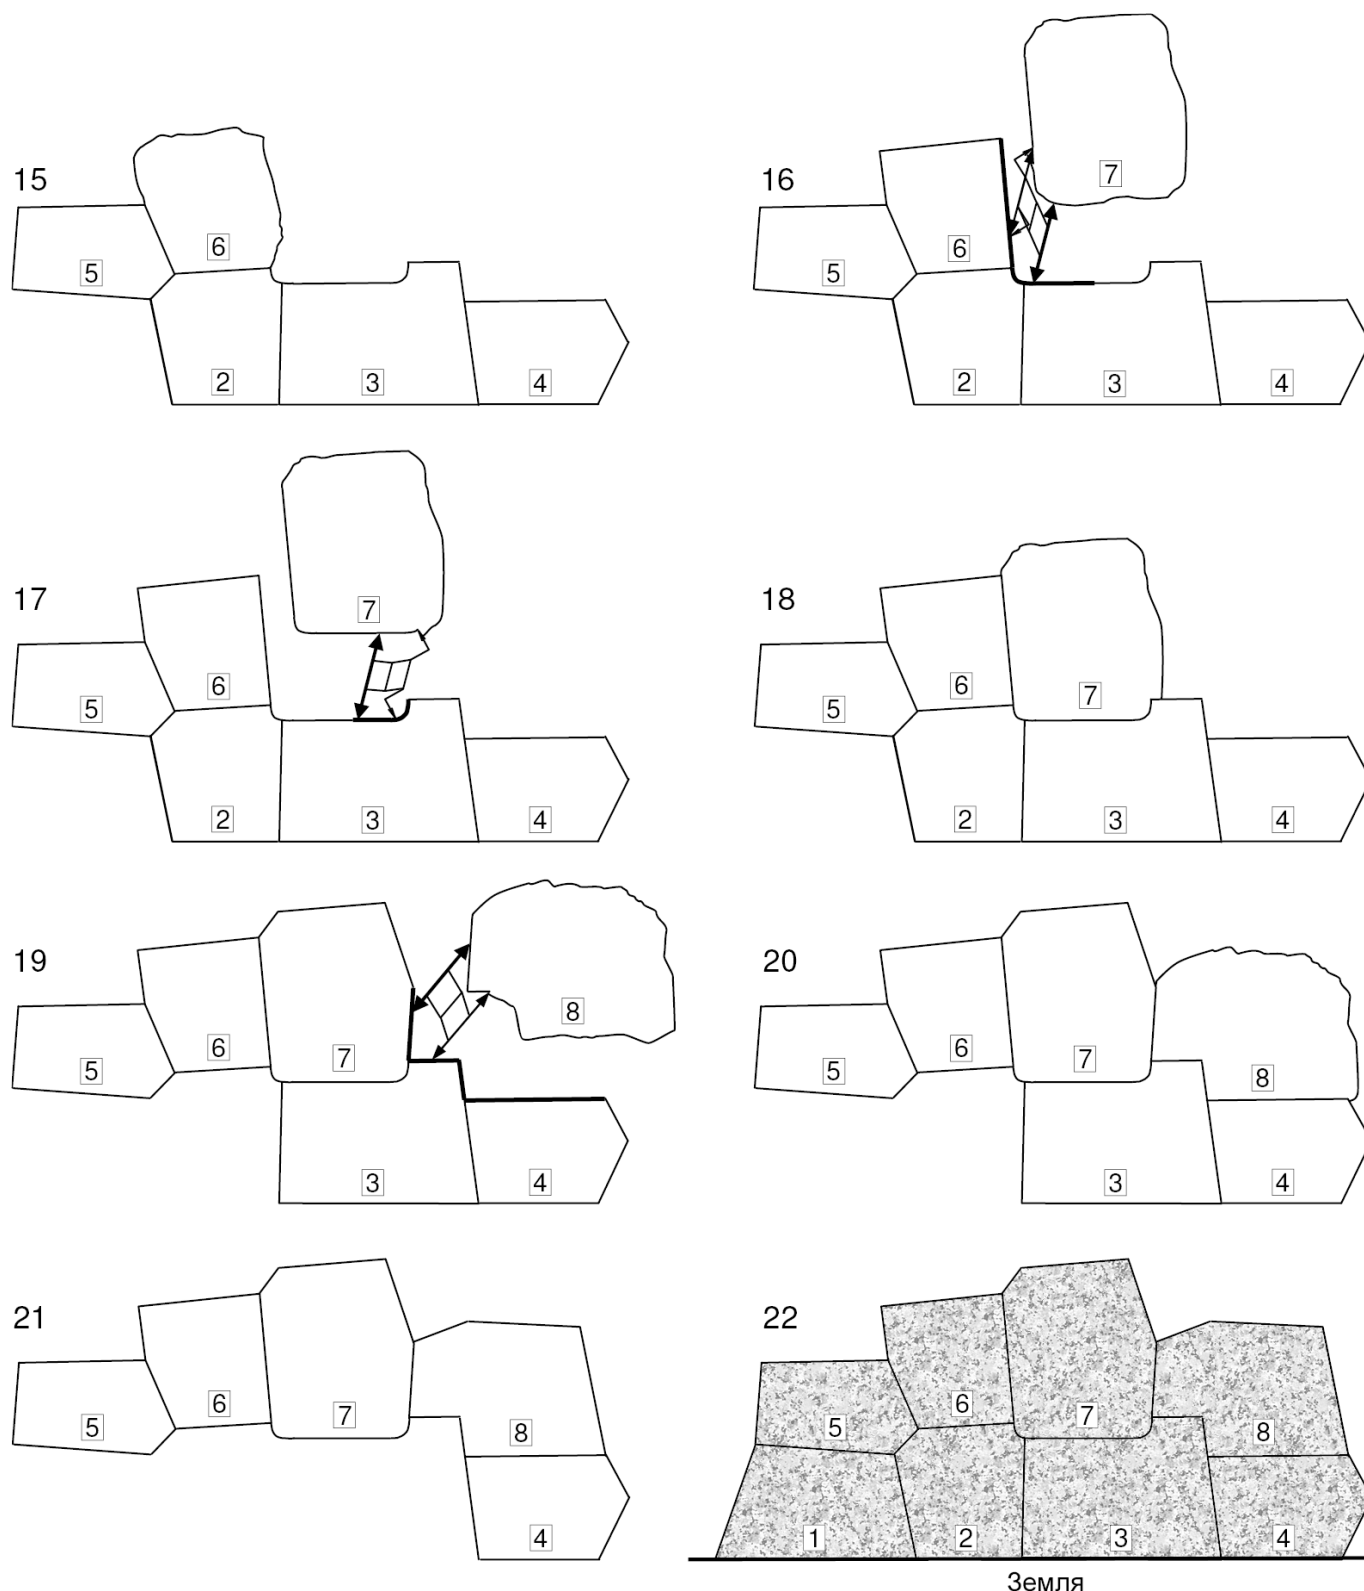

Рис. 5. Продолжение.

нены к основаниям под слишком острыми углами (меньше  $45^\circ$ ), то в измерительный стержень вкручивают изогнутые наконечники; иначе – прямолинейные. Транслятор на Рис. 5 представлен схематично. Чтобы не перегружать рисунок деталями, передвижения несущего стержня по обрабатываемому участку, связанные с исчерпанием диапазона действия транслятора, здесь и далее не показаны.

После изготовления участка сопряжения блоки стыкуют (поз. 4). Затем на оставшейся боковой поверхности каменной заготовки блока 2 формируют остальные (произвольные) грани этого блока (поз. 5). Как и ранее, обработка этих граней за исключением существенно криволинейных участков в L- и U-образных выемках (поз. 7) представляет собой

спрямление сложной исходной формы каменной заготовки близкими к плоскостям поверхностями. Перечисленные выше шаги повторяют для третьего, четвёртого (поз. 5-10) и, если требуется, последующих блоков первого ряда. Закончив построение первого ряда, приступают к изготовлению второго ряда кладки (блок 5, поз. 11).

В отличие от блоков первого ряда, где стыковка соседних камней происходила обычно по одному боковому участку, блоки второго и последующих рядов стыкуются по более чем одному участку. Как правило, стыковка этих блоков производится по основанию и участку боковой поверхности, примыкающему к этому основанию (поз. 11). Если угол между соседними копируемыми участками близок к  $180^\circ$ , то транслятор устанавливается на плоские опоры. В противном случае транслятор устанавливается на опоры с заострениями.

Подгоняемый блок следует так располагать относительно кладки, чтобы транслятор, установленный на опоры с заострениями, был наклонён примерно одинаково к обоим копируемым участкам. Если угол между двумя копируемыми участками слишком острый (меньше  $45^\circ$ ), то в измерительный стержень вкручивают изогнутые наконечники, иначе – прямолинейные. Если изогнутый наконечник не может проникнуть в слишком острый внутренний угол, то такой угол в кладке следует заменять скруглением подходящего радиуса.

Отметим, что участки сопряжения между блоками только изображены на Рис. 5 как прямолинейные. На практике все подобные участки являются криволинейными в большей или меньшей степени. После завершения обработки блока 5 и проверки качества его сопряжения (поз. 13), блок 1 можно извлекать из временной кладки (поз. 14) и передавать на окончательную сборку стены (поз. 22). Обработка блока 6 подобна обработке блока 5 (поз. 14-16).

Обработка блока 7 под U-образную выемку состоит из двух этапов. Вначале копируется боковая сторона блока 6 и примерно половина U-выемки в блоках 2 и 3, которая представляет собой первую (прямую) L-образную выемку (поз. 16). Затем копирование U-образной выемки продолжается на второй (встречной) L-образной выемке (поз. 17). Копирование прямой L-выемки (поз. 16) может быть выполнено как с помощью прямых наконечников, так и изогнутых (на Рис. 5 оба типа наконечников для наглядности показаны вместе). Копирование встречной L-выемки (поз. 17) выполняется с помощью изогнутых наконечников. Отметим, что в ходе переноса прямой и встречной L-образных выемок ориентация транслятора в пространстве должна оставаться неизменной.

Если изначально при переносе U-образной выемки в измерительный стержень были вкручены прямые наконечники, то на втором этапе их следует заменить на изогнутые (заданное расстояние между концами щупа и указателя при этом не должно измениться). Если изначально при переносе U-образной выемки в измерительный стержень были вкручены изогнутые наконечники, то на втором этапе их следует повернуть на  $180^\circ$ , вкручивая щуп и выкручивая указатель (или, наоборот, выкручивая щуп и вкручивая указатель).

При большом количестве острых углов и U-образных выемок в кладке удобно пользоваться транслятором рельефа, у которого измерительный стержень имеет цилиндрические шарниры, обеспечивающие ему свободное вращение вокруг своей оси (см. Рис. 4б). В этом случае настройка положения изогнутых наконечников измерительного стержня для работы на первой и второй L-образных выемках фактически сводится к повороту измерительного стержня вокруг своей оси на подходящий в данном месте угол.

Установив блок 7 на своё место (см. Рис. 5, поз. 18), оставшаяся боковая поверхность этого блока подвергается произвольной обработке (поз. 19). Закончив работу с блоком 7, блок 2 может быть извлечён из временной кладки (поз. 19) и перемещён к месту возведения полигональной стены для окончательной установки (поз. 22). Если блок предыдущего ряда оказывается неизвлекаемым или трудноизвлекаемым на данном этапе подгонки блоков, то этот блок можно извлечь позже, когда будут готовы блоки его сдерживающие.



Подгонка блока 8 (поз. 19-21) понятна из рисунка. При необходимости третий и последующие ряды полигональной кладки изготавливаются аналогично тому, как изготавливался второй ряд кладки. Если стена не является подпорной, то финальную обработку её поверхности, образуемую тыльными сторонами каменных блоков, удобнее выполнять после сборки стены. Окончательный вид стены, состоящей из восьми блоков, уложенных в два ряда, показан на рисунке, поз. 22.

Угловые блоки, соединяющие стены, скажем, под углом  $90^\circ$ , в ходе сопряжения укладываются на грунт в целом так же, как и обычные блоки. Нужно только следить, чтобы плоскость соответствующей лицевой грани углового блока располагалась горизонтально и примерно совпадала с плоскостью лицевой поверхности изготавливаемой стены. Для этого под угловой блок в грунте производится выемка подходящей формы и глубины. Фиксация углового блока на земле осуществляется так же, как и обычного – с помощью клинящих камней. После завершения стыковки блоков первой стены на угловые блоки краской наносятся риски совмещения, после чего каменные блоки за исключением угловых отправляются к месту окончательной сборки.

Далее подгонку блоков второй стены начинают с первого самого нижнего углового блока, который поворачивают на  $90^\circ$  так, чтобы вторая лицевая грань этого блока теперь оказалась обращённой вверх. После этого к этому угловому блоку подстыковывают первый блок второй стены описанным выше способом. Далее по мере подгонки блоков второго и последующих рядов второй стены угловые блоки пристыковывают друг к другу, используя риски совмещения.

#### **2.11.4. Особенности применения транслятора рельефа**

Работа предложенного приспособления базируется на хорошо известном принципе сопряжения двух поверхностей.<sup>7</sup> В статье 12 данный принцип сопряжения каменных блоков положен в основу способа изготовления полигональной кладки. В отличие от способа, изложенного в статье 12, в рассматриваемом способе рабочее положение транслятора рельефа в пространстве благодаря двойному параллелограммному механизму может быть любым.

На практике наиболее удобными положениями являются положения транслятора близкие к горизонтальному, так как они позволяют каменщику обрабатывать вертикально расположенные сопрягаемые поверхности каменных блоков, лежащих на земле напротив друг друга. Лицевая поверхность каменного блока располагается горизонтально и также полностью доступна для обработки. Более того, подогнанные предлагаемым способом блоки можно стыковать в таком положении друг с другом (применяя небольшие подпорные камни), что позволяет перед укладкой блоков в стену проверять качество выполненных сопряжений.

В способе 12 из-за привязки измерительного стержня к вертикали при помощи отвеса, каменщик для обработки верхней стороны блока предыдущего ряда вынужден расположить блок текущего ряда, по основанию которого производится подгонка, над блоком предыдущего ряда, что небезопасно и требует больших дополнительных усилий. В частности, необходимо предусмотреть упоры (выемки или выступы) на каменных блоках, изготовить брёвна-упоры, заглубить брёвна-упоры в землю, в начале работы поместить каменные блоки на брёвна-упоры, а после окончания работы снять их с брёвен-упоров. При этом для доступа к обрабатываемой поверхности с лицевой стороны стены и для доступа к самой лицевой стороне требуются помосты, леса, пандусы и т. п. Кроме того, использование в способе 12 отвеса, заметно снижает производительность работы каменщика, так как в ходе обработки поверхности блока на успокоение отвеса затрачивается довольно много времени. Помимо этого, само использование отвеса бывает сильно затруднено в случае сильного ветра.

Ещё одним недостатком способа 12 является то, что измерительный стержень в этом

способе в отличие от транслятора рельефа незафиксирован в пространстве полностью. В результате в ходе обработки каменных блоков обязательно будут происходить непреднамеренные повороты стержня вокруг вертикальной оси на небольшие углы  $\pm\Delta\alpha$ . Погрешность  $\Delta l$ , связанная с такими поворотами, тем больше, чем больше угол поворота  $\Delta\alpha$  и чем больше длина  $l$  стержня. Для простоты положим, что измерительный стержень первоначально располагается нормально к двум параллельным плоским участкам обрабатываемых каменных блоков. Тогда погрешность, вызываемую случайным поворотом стержня, можно оценить по следующей простой формуле:  $\Delta l = l \cdot (1/\cos \Delta\alpha - 1)$ . Таким образом, для измерительного стержня даже небольшой длины, скажем,  $l=70$  см, получаем, что при отклонении стержня всего лишь на угол  $\Delta\alpha=7^\circ$  от правильного исходного положения погрешность  $\Delta l$  в способе 12 уже превысит 5 мм.

Винсент Ли, автор работы 12, первоначально отталкивался от того, что полигональная кладка в перуанских мегалитических сооружениях создавалась руками индейцев. В соответствии с этой изначальной посылкой Винсент Ли был вынужден использовать отвес, как самый простой измерительный инструмент, который мог быть известен индейцам в то время. Кроме того, автор хотел в предлагаемом им способе создания полигональной кладки как-то задействовать имеющиеся на лицевых сторонах каменных блоков крепости Саксайуаман выступы (боссы) и выемки. Отсюда возникла крайне затратная по прикладываемым усилиям схема расположения обрабатываемых каменных блоков один над другим.

В предлагаемом способе, параллельное перемещение измерительного стержня никак не связано с нормалью к поверхности земли и может происходить при любой ориентации транслятора. Поэтому подгонка блоков и их предборка производятся, когда текущий и предыдущий ряды блоков лежат на земле своей тыльной стороной вниз. Отсюда, также как и в случае применения 3D-пантографа, признаком использования данного способа подгонки блоков будет одинаковый наклон следов зубила на сопрягаемых гранях каменных блоков к направлению перпендикулярному (почти перпендикулярному в случае небольшого наклона стены) лицевой поверхности. Только завершив укладку блоков текущего ряда на земле, блоки предыдущего ряда можно устанавливать на их места в строящейся стене. Поэтому в предложенном способе нет необходимости проводить обработку камней на самой возводимой стене в стеснённых условиях и с риском для жизни.

Перенос рельефа смежных участков с резкой границей и с плавной границей (например, в виде L- или U-образных выемок) выполняется в один приём. Это означает, что ориентация в пространстве несущего/измерительного стержня и расстояние между кончиками щупа и указателя измерительного стержня остаются на обоих участках всё время неизменными. При переходе на участок встречной L-выемки во время переноса U-образных выемок требуется замена прямых наконечников измерительного стержня на изогнутые или поворот на  $180^\circ$  изогнутых наконечников, если таковые использовались изначально.

В процессе переноса рельефа транслятор часто располагается под углами к стыкуемым поверхностям, которые значительно отличаются от нормали (см. Рис. 5). Такое расположение транслятора в случае достаточно острых щупа и указателя вызывает лишь незначительную дополнительную погрешность переноса рельефа. Чем сильнее отклонение от нормали и больше радиусы закругления острий щупа и указателя, тем величина этой погрешности больше. Изогнутый щуп и изогнутый указатель предназначены для использования в тех случаях, когда прямой щуп оказывается наклонён к копируемой поверхности под малым углом.

Описанный в настоящей работе способ подгонки блоков мог быть задействован при возведении стен со сравнительно простой полигональной кладкой, где сопрягаемые участки поверхности имеют небольшую кривизну, нет фигурных заострений или резких ступенек в местах тройных стыков (нет «ощущения лепки», см. следующий раздел). Так как в рассмотренном способе производится последовательная подгонка блоков по месту, то при-



знаком применения данного способа будет являться установка больших блоков в первом ряду кладки непосредственно на укрепленный грунт или на предварительно подготовленное скальное основание, т. е. без использования небольших “юстировочных” блоков в первом ряду кладки, обеспечивающих правильное взаимное положение крупных блоков второго и последующих рядов (см. подробнее в разделе 2.1). Если мы видим, что по всем признакам применялся метод подгонки блоков по месту, но большие блоки кладки лежат на небольших блоках, то это означает, что кладка когда-то пересобиралась и, возможно, была перенесена сюда из другого места.

Ещё одним признаком применения транслятора рельефа будут являться небольшие парные расположенные строго напротив друг друга выемки (число выемок тем больше, чем больше площадь сопрягаемой поверхности). Выемки создаются в тех местах, где несущий стержень транслятора устанавливается под наклоном к сопрягаемым поверхностям на опоры с заострениями. Присутствие на одной из сопряжённых поверхностей совокупности наложенных друг на друга слабоконтрастных кольцеобразных областей также может служить признаком использования предложенного выше транслятора рельефа. Ещё одним признаком использования транслятора является наличие “kozyрька”, часто возникающего в ходе подгонки блоков (см. Рис. 5, поз. 4, блок 2; поз. 6, блок 3; поз. 18, блок 7; поз. 20, блок 8). Изредка подобные козырьки встречаются на незавершенных блоках, являясь, в свою очередь, признаком незавершенности блока.<sup>48</sup>

В заключении отметим, что основным преимуществом предложенного способа является то, что половина сопрягаемых поверхностей каменных блоков обрабатывается в нём произвольно.

### **3. Особенности полигональной кладки, вопросы датировки, авторства, экономические основания**

#### ***3.1. Общая выпуклость лицевой стороны и наплыв в нижней её части, боссы, заострения/ступеньки в местах тройных стыков, полигональная облицовка барельефом***

Характерная общая выпуклость лицевой поверхности, а также наплыв в нижней её части (не путать с боссами/сосцами), обнаруживаемые в некоторых постройках (см., например, Фото. 1-4), часто служат одним из доказательств “пластичной” версии<sup>14-17</sup> изготовления полигональной кладки. Согласно пластичной версии не до конца затвердевшие блоки укладывались друг на друга. В результате межблочные зазоры в полигональной кладке смыкались под действием собственного веса этих блоков, а лицевая поверхность приобретала указанные выпуклость и наплыв.

В предлагаемом способе оба признака – выпуклость и наплыв могут сами собой появиться на стадии изготовления глиняной модели стены, если глиняный замес не достаточно густой и не используется какая-то ограждающая конструкция с лицевой стороны. Выпуклость и наплыв также могут быть изготовлены намеренно в процессе лепки глиняной модели.

Скорее всего, выпуклость и наплыв придавались блокам намеренно. Обе особенности усиливают ощущение массивности, грандиозности постройки, её колоссального веса; нам кажется, будто камни сплющиваются под огромной тяжестью. Выпуклость также была призвана продемонстрировать наивным индейцам могущество прибывших белых, способных при необходимости “вылепливать” постройку из громадных твёрдых камней, словно из теста.

Что касается боссов (см. Фото. 9), то помимо архитектурного украшения, они служат своего рода подписью той группы профессиональных строителей (см. раздел 3.5), которая создавала постройки в Перу и подобные им по всему миру. Боссы, размеры, форма и расположение которых не подчиняются какой-то закономерности, создавались на каменных глыбах произвольной формы в тех случаях, когда на лицевой стороне в подходящем

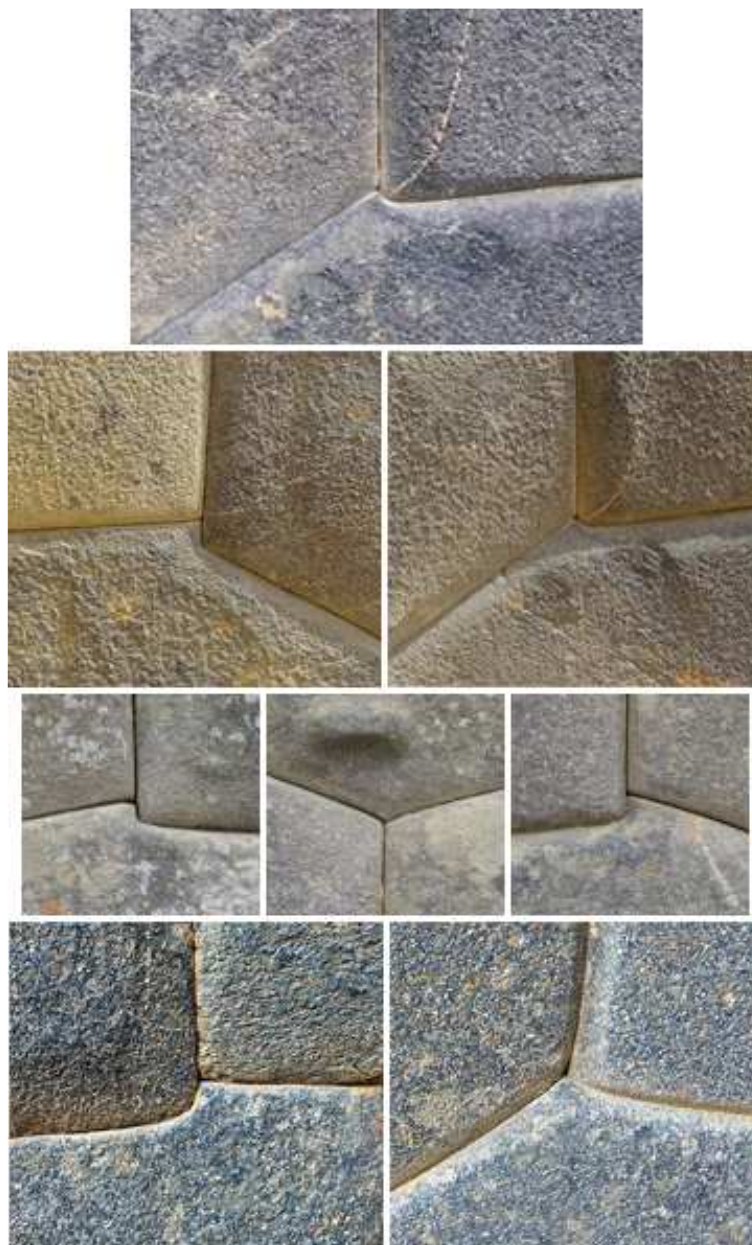

Рис. 6. “Клювики” и ступеньки.

месте просто имелся избыток материала нужных размеров. В тех каменных блоках, где боссы встречаются регулярно, для получения последних с лицевой поверхности удалялся слой материала. В этом случае боссы обычно несильно выдаются наружу, поскольку, чем сильнее босс выдаётся наружу, тем толще тот слой материала, который следует убрать с лицевой поверхности.

На многочисленных средневековых рисунках и гравюрах (см., например, Илл. 1) хорошо видно, что для удержания каменных блоков в ходе подъемно-транспортных операций строителями тех лет использовался самосхватывающий механизм – клещевой захват (рычажный захват<sup>24</sup>). Так как при использовании клещевого захвата такелажные стропы не требуются, то на каменном блоке не нужно изготавливать ни выступы, ни углубления, ни пазы для зацепления/пропускания этих строп. Таким образом, для подъёма, перемещения и установки как каменных заготовок, так и законченных блоков боссы не требуются.

В местах, где стыкуются три смежных блока, хорошо видны заострения (“клювики”/ступеньки, см. Рис. 6). Эти элементы создаются в процессе лепки глиняной модели и затем переносятся с помощью пантографа на каменный блок. Помимо упора, ограничивающего перемещение смежного блока в горизонтальной плоскости, клювики/ступеньки придают полигональной кладке особое изящество. Клювики вместе с параллельностью



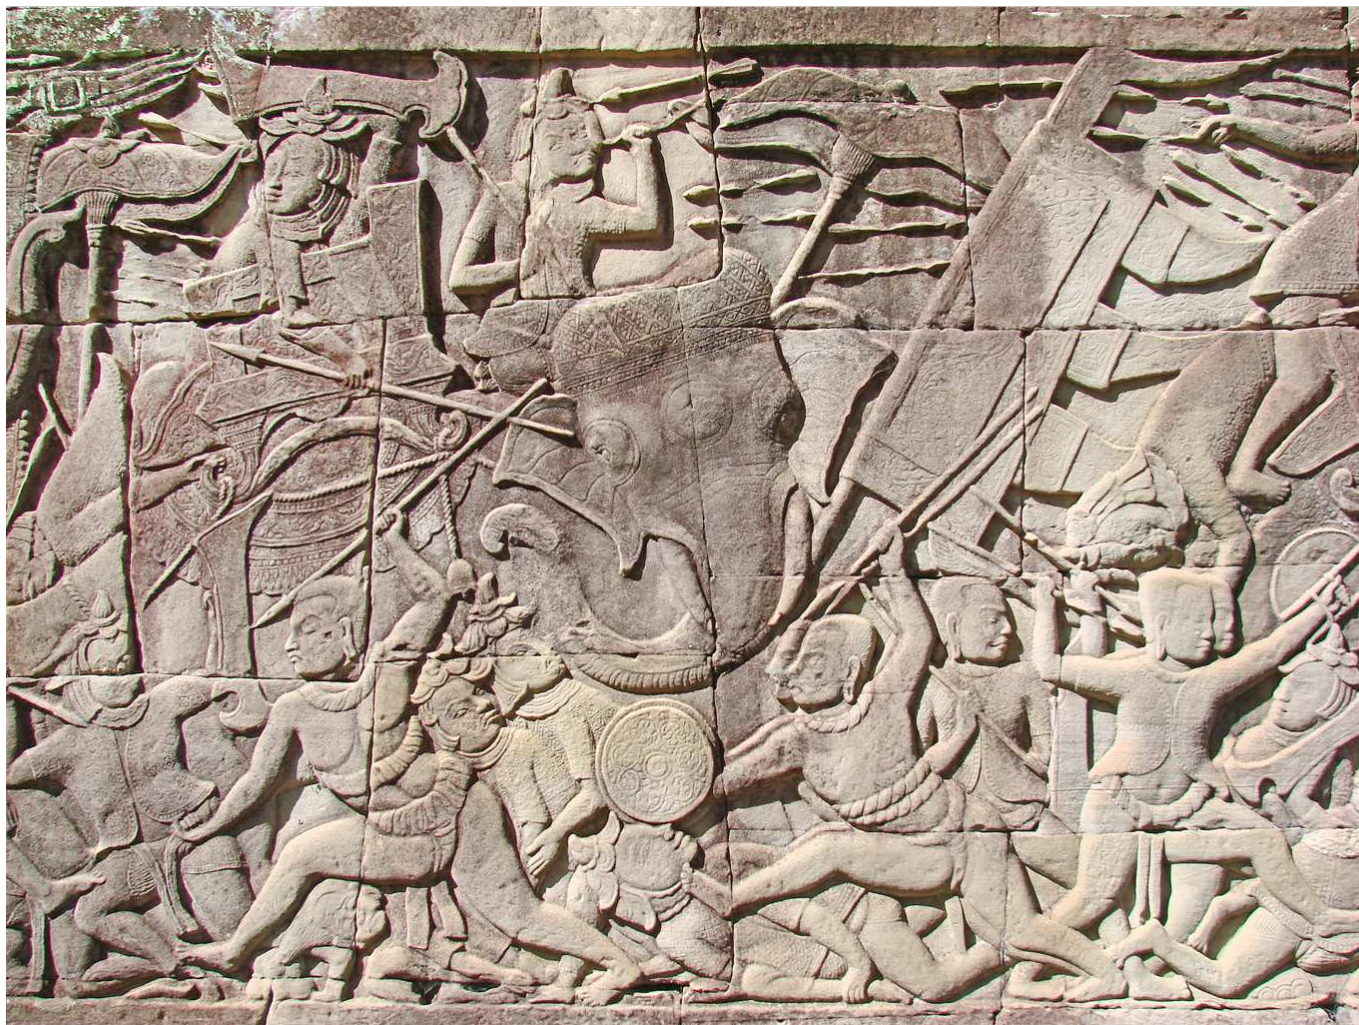

Фото. 17. Фрагмент барельефа на лицевой поверхности полигональной кладки храмового комплекса Ангкор, Камбоджа (J.-P. Dalbéra, 2011, [www.flickr.com/photos/dalbera](http://www.flickr.com/photos/dalbera)).

плавно изменяющихся криволинейных кромок должны были по замыслу создателей придать ощущение лёгкости работы с камнем. Эти особенности заставляют зрителя думать, что блоки буквально вылеплены из камня. И надо отдать должное старым мастерам, этот приём им удался!

Учитывая сказанное выше, вместо термина “полигональная кладка” будет вполне справедливо использовать термин “полигональная скульптура” в тех случаях, когда каменная постройка создаётся на основе ручной лепки глиняной модели, выполненной в определённом художественном стиле с уникальными замковыми сопряжениями между блоками. Помимо простой обработки лицевой стороны каменных блоков предложенная технология позволяет создавать полигональную кладку, лицевая поверхность которой представляет собой барельеф. Примером, где могла быть применена подобная технология облицовки, является храмовый комплекс Ангкор (см. Фото. 17).<sup>47</sup>

### **3.2. Косвенная датировка по наблюдаемым разрушениям элементов кладки**

Одно из слабых в смысле прочности мест полигональной кладки это клювик. Поэтому клювики должны разрушаться в ходе естественного процесса выветривания в первую очередь. Многие камни в Перу покрыты лишайником (см. Фото. 7, 9), поэтому при оценке скорости разрушения камня помимо выветривания должен также учитываться и биологический фактор. Удивительно, но в горах (Куско, Мачу-Пикчу, Ольянтайтамбо и др.), где климат характеризуется резкими перепадами температуры 15-20° С в течение суток, большим количеством осадков и лёгкими заморозками зимой (июнь-август),<sup>49</sup> рассматриваемая в статье разновидность полигональной кладки прекрасно сохранились.

Помимо выветривания причиной разрушения клювиков может быть сдвиг камней в кладке при землетрясении или при оползневом смещении склона (часто провоцируется землетрясением).<sup>3-5</sup> Следует отметить, что сколы клювиков могли возникнуть и в процессе изготовления каменных блоков, и при их транспортировке, и во время установки, и при реставрации. Некоторые из таких сколов можно частично исправить. Исправленные клювики будут выглядеть более утопленными в тело кладки, чем нормальные.

Изучение полигональных кладок из твёрдых пород (гранит, андезит, базальт) показывает, что разрушения клювиков имеются, но этих разрушений мало. Отсутствие заметных разрушений при достаточно суровых климатических условиях и высокой сейсмической активности в Перу, дают основание утверждать о сравнительно недавней порядка 300 лет постройке мегалитических комплексов. Приблизительную оценку можно получить, сравнив состояние мегалитических комплексов с памятниками, находящимися в похожих погодно-климатических условиях, изготовленными из сходных материалов, дата возведения которых доподлинно известна.

### **3.3. Как доказать? Что и где следует искать?**

Что может служить подтверждением предлагаемых способов изготовления полигональной кладки? На территории или вблизи комплексов с полигональной кладкой или в карьерах должен сохраниться строительный мусор, в котором следует искать обломки глиняных моделей блоков и обломки глиняных/гипсовых реплик. Конечно, прежде всего, нужно ознакомиться с материалами, проводившихся раскопок. Возможно, какие-то подходящие по форме, размерам и материалам обломки уже были найдены и задокументированы. Большая часть обломков, скорее всего, шла на укрепление грунта под следующую возводимую постройку. Поэтому в случае перекладки какой-либо постройки, связанной с её естественным разрушением, свидетельства в виде глиняных моделей и реплик следует искать и в грунте под самой постройкой.

Если предположить, что в пантографе, используемом строителями, глиняная модель и каменная заготовка располагались так же, как и в современном пантографе, т. е. горизонтально тыльной стороной вниз (для фиксации блока в случае неровной тыльной поверхности используются небольшие подпорные камни), то следы от зубила на боковой поверхности каменных блоков должны проходить справа на лево (зубило в левой руке, молоток в правой) и сверху вниз (в начале следа углубление больше, чем в конце). Сами следы должны представлять собой короткие параллельные штришки, расположенные вертикальными столбцами.

Следы от зубила нужно искать на каменных блоках из твёрдых пород – гранит, андезит, базальт. Мягкие породы камня, такие как туф, известняк, песчаник имеют высокую пористость; поверхностный слой этих камней быстро разрушается выветриванием. Кроме того, следы от зубила на поверхности известняка легко уничтожаются в ходе последующей операции сглаживания обстукиванием. Поверхности сопряжения каменных блоков из твёрдых пород, которые пролежали под открытым небом вне кладки неизвестно сколько лет, также нет смысла изучать по причине выветривания. Для анализа поверхности сопряжения следует брать камни из какой-то нетронутой кладки с минимальными зазорами, в которые могло попадать очень незначительное количество влаги.

Нужно отметить, что кладку из каменных блоков, которой несколько сотен лет, скорее всего, невозможно разобрать так, чтобы сохранить неповреждённым приповерхностный слой камня в местах контакта. Дело в том, что в течение всего срока существования кладки в указанных выше климатических условиях в местах контакта протекали различные физико-химические процессы, вызывающие в этих местах изменение минерального состава. В результате, в зависимости от процесса в одних местах контакт разрушался (с образованием песка), а в других, напротив, зарастал и упрочнялся. Попытка разъединения мест, где произошло зарастание-упрочнение, приведёт к разрушению приповерхностного слоя камня, примыкающего к контакту. В любом случае после разборки старой по-



лигональной кладки размеры камней и их геометрия изменятся. Поэтому снова собрать старые блоки так, чтобы между ними были прежние крошечные зазоры, уже не получится.

Для выявления на поверхности каменных блоков предполагаемых следов механической обработки хорошо подходит метод оптической 3D-профилометрии (интерференционной микроскопии).<sup>50</sup> Метод позволяет получить микрорельеф поверхности, после чего провести его компьютерный анализ. Компьютерный анализ с помощью специальных программ фильтрации и обработки изображения поверхности помогает более чётко проявить, а в некоторых случаях даже выявить слабоконтрастные следы зубила, разрушенные обстукиванием и выветриванием (модификацией) поверхности камня. В частности, возможно определить Фурье-спектр пространственных частот измеренного микрорельефа поверхности каменного блока, после чего сравнить этот спектр с Фурье-спектрами пробной поверхности, обработанной несколькими видами зубил согласно описанным в статье приемам. Если для измерения микрорельефа будет использоваться стационарный профилометр, то потребуется изготовить реплику поверхности из гипса или силикона. В случае использования портативного профилометра процесс упрощается, поскольку прибор устанавливается непосредственно на измеряемую поверхность.

### **3.4. Косвенная датировка по времени изобретения 2D- и 3D-пантографов**

Если принять предложенные способы изготовления полигональной кладки, то можно приблизительно датировать постройки “невероятно” древних Инков годами изобретения/постройки пантографов европейцами. Пантограф для работы с плоским рисунком изобретён в 1603-1605 годах Кристофом Шейнером.<sup>51</sup> Примечательно, что информация об устройстве этого аппарата была опубликована автором в виде отдельной книги<sup>52</sup> только спустя 28 лет (!) после изобретения.

Сравнение транслятора рельефа с 2D-пантографом показывает, что эти устройства сопоставимы по своей механической сложности, точности работы, используемым материалам и технологии изготовления. Отсюда следует, что транслятор рельефа вполне мог быть придуман и построен в начале 17 века. Транслятор рельефа мог появиться даже раньше, так как он функционально проще – от него не требуется решать задачу пропорционального масштабирования.

Примерно в 1710-1720 годах русскими механиками Францем Зингером и Андреем Нартовым<sup>53</sup> был построен токарно-копировальный медальерный станок (см. Фото. 18).<sup>54,55</sup> Станок предназначался для изготовления в автоматическом режиме медалей путём переноса рельефа с модели медали большого размера. Сравнить станок Зингера-Нартова с современным 3D-пантографом, используемым скульпторами (см. Рис. 2), не совсем корректно, так как кинематические схемы этих механизмов сильно различаются. Несмотря на это, следует обратить внимание на сложность механизма станка, которая заметно превосходит сложность механизма современного пантографа. В частности, в 3D-пантографе перемещение щупа по поверхности модели и приложение режущего инструмента к поверхности заготовки осуществляются скульптором вручную, тогда как в приводимом примере станка эти функции реализуются без участия человека. Отметим, что в 18 веке копировальные станки подобные данному строились и использовались во многих европейских странах.

В 1807 году Джеймс Уатт<sup>56</sup> приступил к созданию механизма<sup>57</sup> (см. Фото. 19), предназначенного для получения уменьшенных копий скульптур.<sup>58</sup> Кинематическая схема механизма Уатта близка к кинематической схеме современного 3D-пантографа. Однако имеется ряд отличий. Вместо шарового шарнира стрела установлена на карданном шарнире; отсутствует параллелограммный механизм; модель и её уменьшенная копия расположены горизонтально и др. С целью сканирования поверхности копируемого 3D-объекта стрела пантографа совершает в горизонтальной плоскости возвратно-вращательное движение вокруг вертикальной оси карданного шарнира.

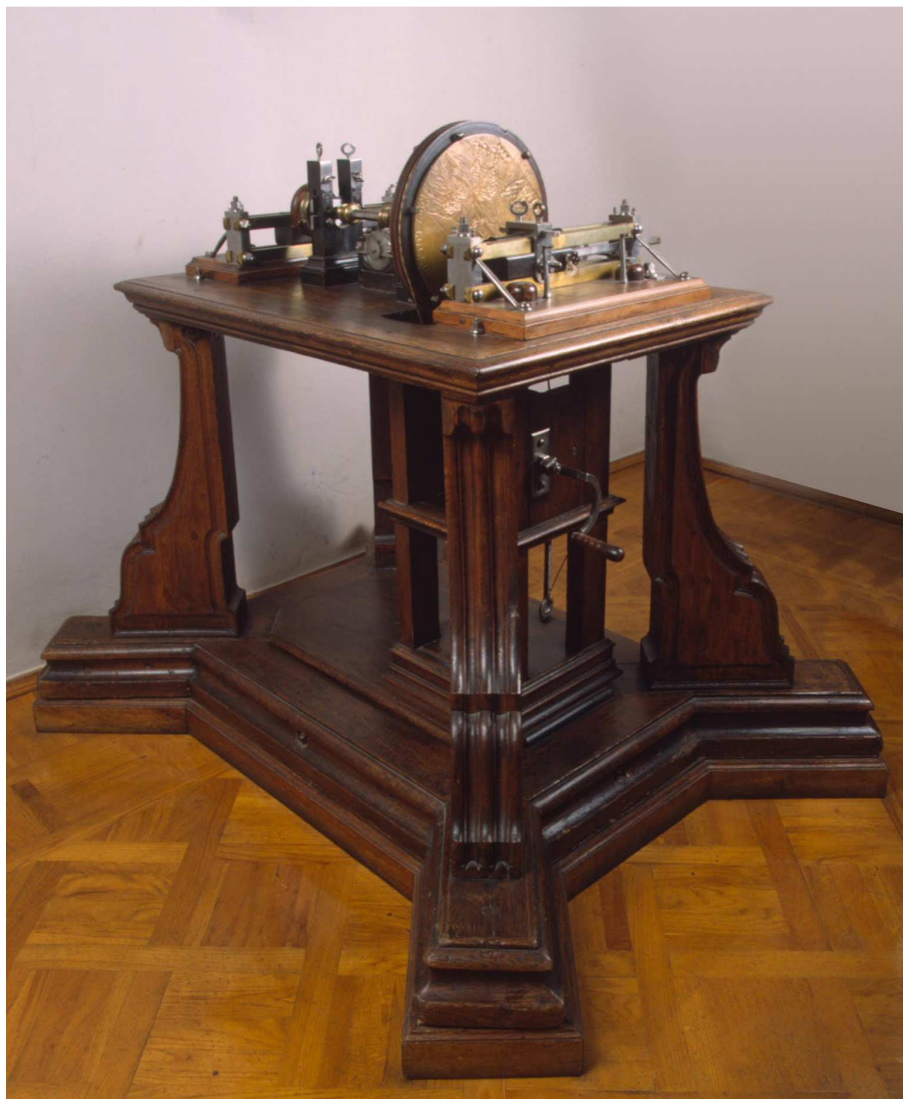

Фото. 18. Токарно-копировальный медальерный станок Ф. Зингера, А. Нартова, 1710 г. Станок предназначался для изготовления медалей по образцу в автоматическом режиме. (Государственный Эрмитаж, Санкт-Петербург, [www.hermitagemuseum.org](http://www.hermitagemuseum.org)).

Наиболее близким по кинематической схеме к современному 3D-пантографу (см. Рис. 2) является пантограф, построенный в 1826 году Бенжамином Чевертоном (см. Фото. 20).<sup>59</sup> При постройке своего пантографа Чевертон опирался на конструкцию, ранее предложенную Джоном Хокинсом.<sup>60</sup> Так же как и пантограф Уатта, пантограф Хокинса-Чевертон предназначался для получения уменьшенных копий скульптур.

Следует отметить, что и пантограф Уатта, и пантограф Хокинса-Чевертон имели встроенный гравёр, фрезой которого выполнялась механическая обработка заготовки. Гравёр в рассмотренных выше способах создания полигональной кладки не требуется. Поэтому конструктивно строительный пантограф заметно проще пантографов Уатта и Хокинса-Чевертон. На Илл. 2 изображено ателье второй половины 19 века, в котором с помощью 3D-пантографа вручную выполнялось массовое копирование статуи.<sup>61</sup>

Нет сомнения, что, создав 2D-пантограф в начале 17 века, учёные того времени и, прежде всего, сам изобретатель 2D-пантографа Кристоф Шейнер сразу же задумались над созданием механизма 3D-пантографа, с помощью которого было бы возможно получать уменьшенные/увеличенные копии трёхмерных объектов. Собственно, для перехода к работе с трёхмерными объектами 2D-пантограф всего лишь следовало закрепить не в цилиндрическом, а в шаровом или карданном шарнире, а модель и заготовку снабдить способностью синхронного поворота вокруг своих вертикальных осей посредством цепной (см. Рис. 2) или зубчатой<sup>59</sup> (см. Фото. 20) передач.



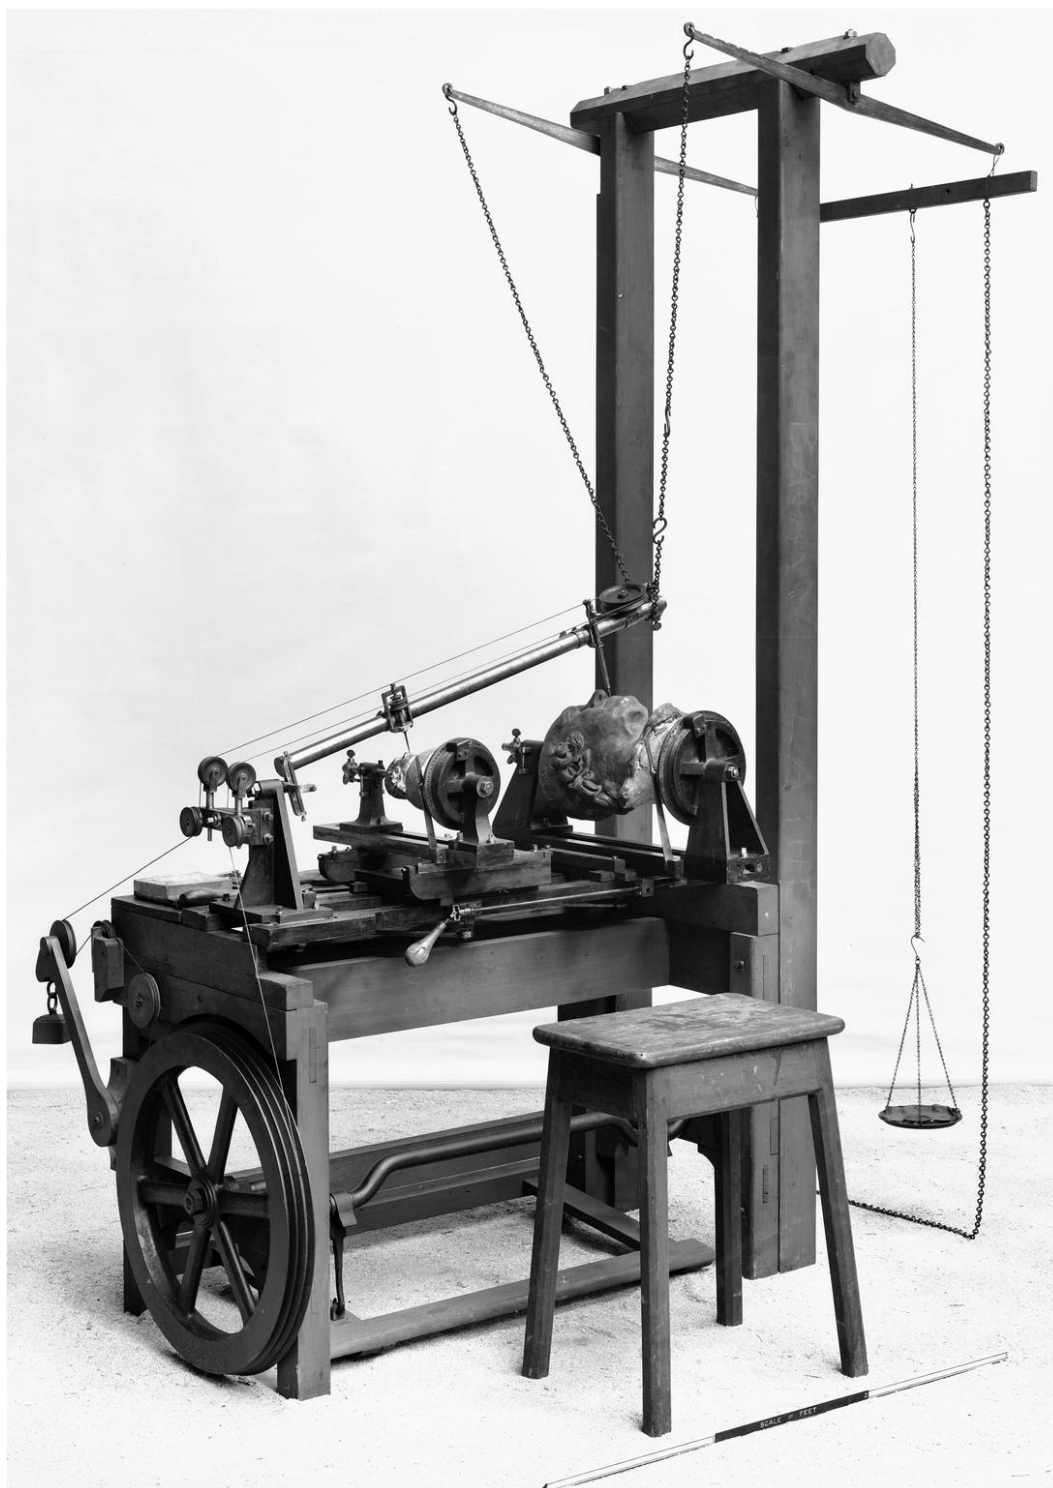

Фото. 19. 3D-пантограф, разработанный и построенный Д. Уаттом, 1807 г. Механизм предназначался для автоматического изготовления уменьшенных копий скульптур (Музей Науки, Лондон, [sciencemuseumgroup.org.uk](http://sciencemuseumgroup.org.uk)).

В строительном пантографе применение цепной передачи более оправдано, чем зубчатой. Дело в том, что из-за больших размеров и веса обрабатываемых каменных блоков размеры и вес используемых зубчатых колёс также оказываются большими. Кроме того, цепная передача позволяет легко изменять расстояние между поворотными платформами, которое отвечает за коэффициент уменьшения/увеличения пантографа. Изменение расстояния осуществляется путём смещения платформ вдоль рамы. Для этого к цепи добавляется или из цепи изымается соответствующее число звеньев и/или цепь натягивается роликом, расположенным на конце подпружиненной консоли. Коэффициент уменьшения/увеличения при этом оказывается практически непрерывной величиной. Для изменения расстояния в случае зубчатой передачи установленный комплект колёс заменяется

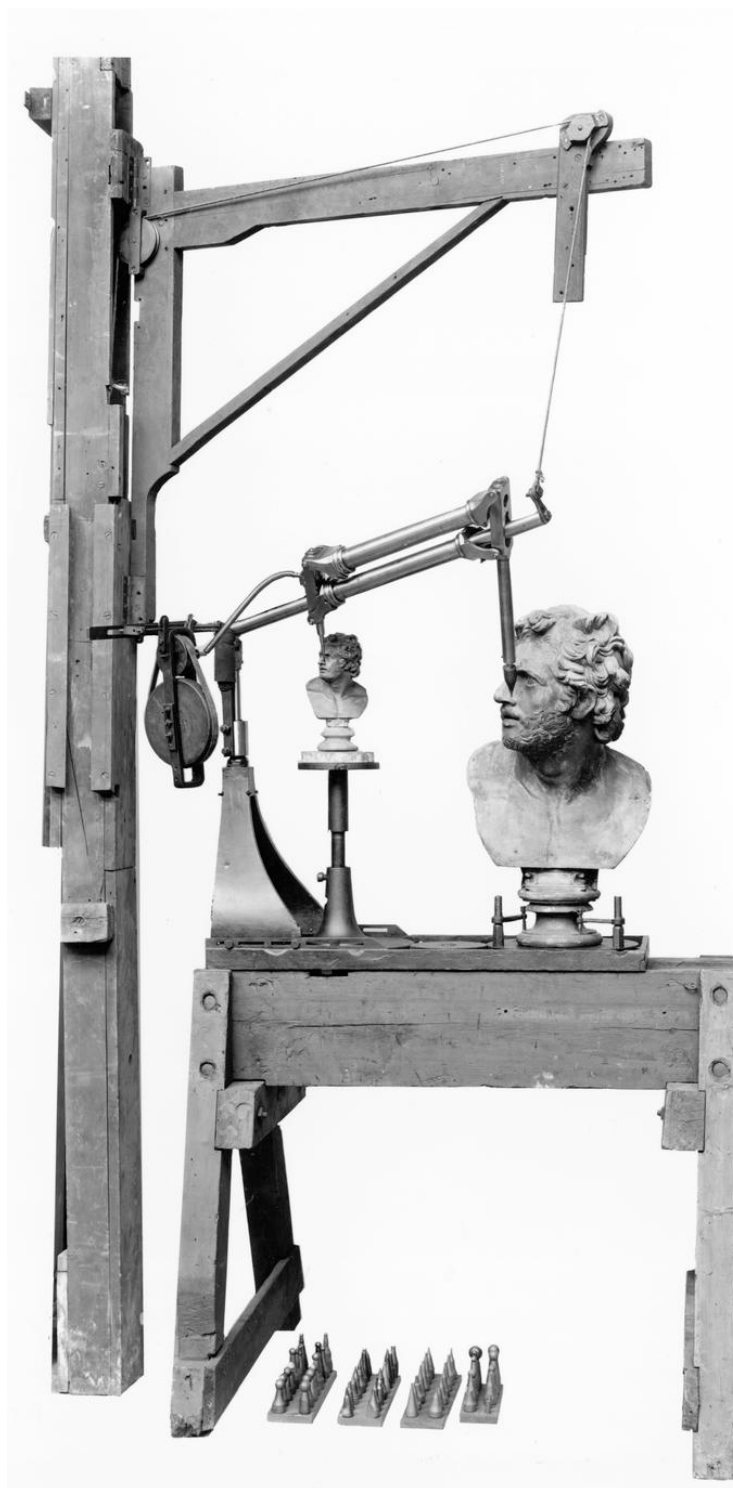

Фото. 20. 3D-пантограф, разработанный и построенный Б. Чевертоном, 1826 г. Механизм предназначался для автоматического изготовления уменьшенных копий скульптур (Музей Науки, Лондон, [sciencemuseumgroup.org.uk](http://sciencemuseumgroup.org.uk)).

наиболее подходящим из имеющихся комплектов, количество которых обычно ограничено. Поэтому коэффициент уменьшения/увеличения оказывается существенно дискретным.

Анализируя механизмы подобные станку Зингера-Нартова, можно сделать вывод о том, что разработка и постройка 3D-пантографа современной конструкции с точки зрения сложности кинематической схемы, технологии металлообработки и используемых материалов была вполне по силам механикам уже в начале 18 века. К тому времени все проблемы, связанные с точностью копирования, а именно: зазоры в шаровом и цилиндрических бронзовых шарнирах, люфты в цепной/зубчатой передаче, а также жёсткости стрелы



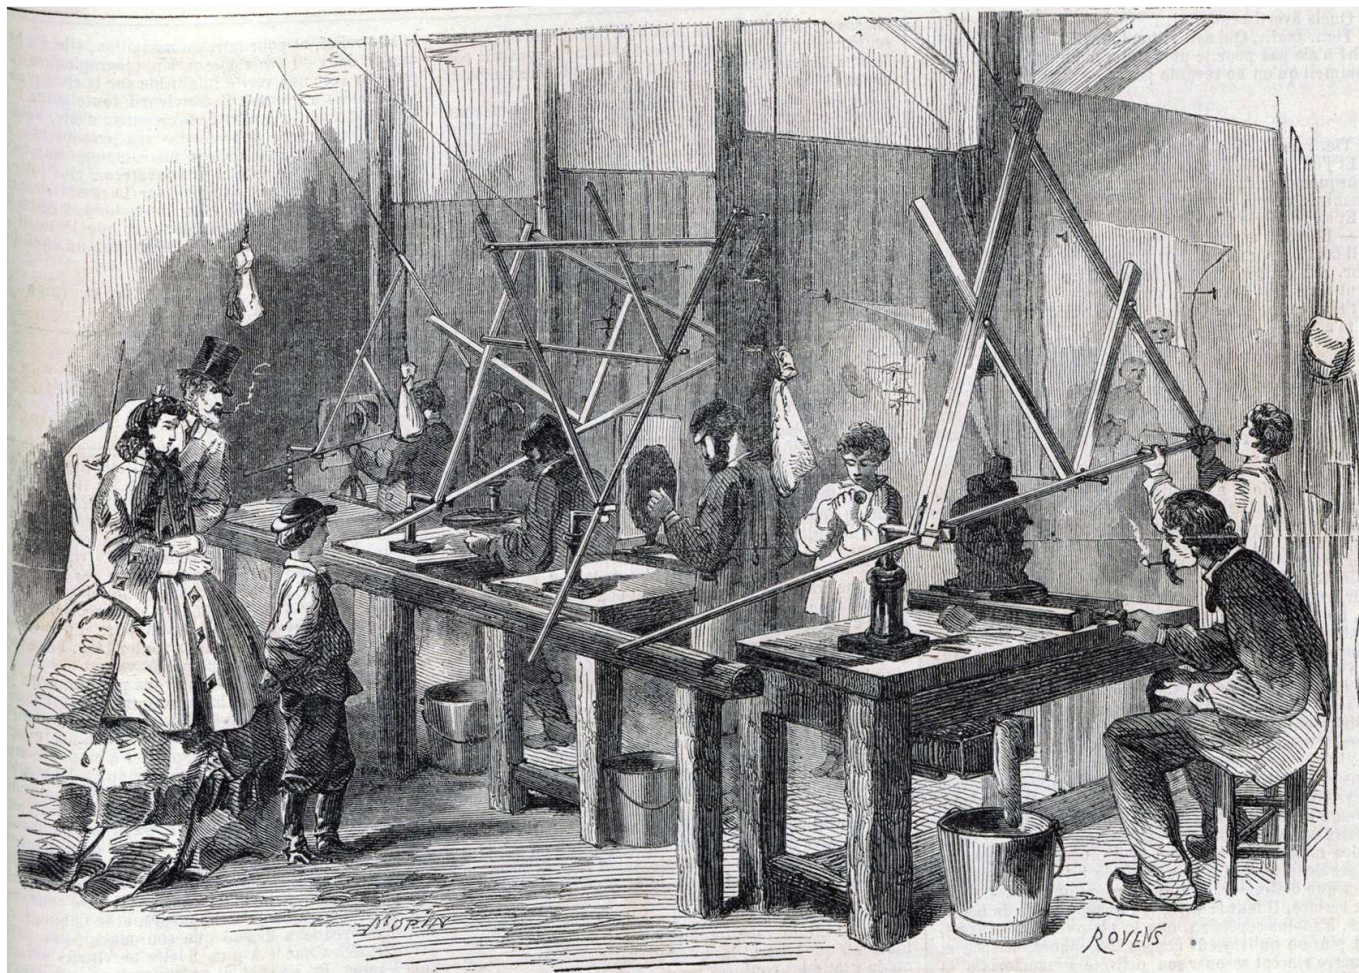

Илл. 2. Ателье 19 века по ручному копированию статуй с помощью 3D-пантографа (рисунок тушью, художники Е. Morin и Е. Rovens, 1864).

и рамы (требуется для поддержания неизменным относительного расположения элементов пантографа в процессе функционирования), уже были успешно решены. Поэтому очень странно, что для создания 3D-пантографа потребовалось так много времени – более 220 лет!

В настоящий момент у нас пока нет ни письменных, ни материальных свидетельств, подтверждающих существования строительного 3D-пантографа в 18 веке. Как бы там ни было, учитывая общий уровень техники того времени, нельзя исключить возможности того, что такой пантограф мог быть разработан, построен и нашёл ограниченное применение в строительстве, но сам изобретатель и его пантограф остались при этом неизвестны широкому кругу специалистов. Дело в том, что мастера-каменщики в те времена не спешили раскрывать свои профессиональные секреты. Судя по тому, как долго просуществовала загадка создания полигональной кладки, мастера-каменщики умели хранить свои секреты хорошо.

### **3.5. Кто строил, когда, зачем и на какие средства?**

Проблема с постройками, выполненными на основе полигональной кладки, состоит в следующем. Официальная история утверждает, что постройки существовали до прибытия европейцев в Новый Свет в 16 веке, и американские индейцы не знали на тот момент ни железных орудий, ни колеса, ни гончарного круга, не имели тягловых животных, не владели технологией обжига кирпича, не обладали письменностью. Из такой постановки следует один единственный вывод: постройки возведены, какой-то более древней цивилизацией, существовавшей в Америке до индейцев, но по культуре работы с камнем соответствующей в целом европейской строительной культуре 16-17 веков.

Проблема с этой мифической более древней цивилизацией состоит в том, что она не оставила после себя никаких иных материальных свидетельств своего существования за исключением нескольких безупречно выполненных каменных построек. Качественная полигональная кладка и сооружения на её основе мгновенно (по историческим меркам) возникают как бы из неоткуда, а затем также мгновенно в никуда исчезают.<sup>19</sup> Нет ни предшествующего, ни последующего заметного развития архитектуры и технологии этих построек. А ведь такое происходит только тогда, когда на некоторую территорию на короткий срок, скажем, на 10 лет, заезжает группа строителей-профессионалов со своими инструментами, приспособлениями и приёмами строительства.

Быстротечность событий, происходивших в строительной сфере тех лет, указывает на высокую производительность труда строителей-гастролёров и их методов строительства. Перечисленные противоречия моментально разрешаются, если авторами построек становятся заезжие европейские строители,<sup>23,62,63,64,65</sup> а время возведения построек переносится из “минус бесконечности” в 17-18 века. Для доставки, перемещения и грубой обработки камней, укрепления склонов и прочих тяжёлых и не требующих никакой квалификации работ, разумеется, нагонялся местный индейский люд по приказу подчинившихся/купленных испанцами индейских вождей. Таким образом, перуанские мегалитические комплексы являются в определённом смысле постройками и Инков тоже, хотя и не столь древних.

Всякое большое строительство всегда опирается на какую-то крепкую экономическую основу. Трудно себе представить, чтобы мегалитические комплексы для индейцев возводились за счёт испанцев. Безусловно, эти комплексы создавались за счёт индейцев и на костях индейцев. Но, что могли предложить индейцы испанским колонизаторам? То золото и серебро, которое у них имелось, было захвачено в первые годы завоевания и увезено в Европу. Родить много хлопка, сахарного тростника или зерна перуанская земля была не в состоянии.

Раз золото и серебро у индейцев на момент завоевания имелось, значит, где-то они его брали. Поэтому испанцами была организована добыча золота, но, главным образом, серебра в шахтах, рудниках и на приисках.<sup>65,66,67,68</sup> А, чтобы работа в коях шла “веселее”, туземное жречество вдохновляло индейский народ видом и грандиозностью мегалитических храмов, которые возводились европейскими строителями за счёт части средств, полученных от добычи драгметаллов.

Поставьте себя на место тех, кто обнаружил буквально гору серебра в Потоси (в настоящее время территория принадлежит Боливии).<sup>67</sup> Для выламывания серебросодержащей руды и её транспортировки к месту извлечения/выплавки серебра требовалось много низкоквалифицированной рабочей силы. Где можно было взять эту рабочую силу в то время? Переброска по морю не могла обеспечить достаточный приток из-за небольшой тоннажности судов и чрезвычайно высокой стоимости. Разумеется, колонизаторы предложили индейским вождям следующее взаимовыгодное сотрудничество: мы возводим для вас сеть храмовых комплексов и тем самым закрепляем за вами некоторую долю прежней вашей власти, вы же обеспечиваете нас людьми для работы в шахтах. Обучение и содержание ваших людей мы берём на себя.<sup>69</sup>

С приходом европейцев ряд индейских вождей вместе со жречеством быстро сообразили, что сохранить хотя бы часть прежней власти можно будет только в том случае, если они пойдут на тесное сотрудничество с захватчиками. Чтобы облегчить процесс взаимодействия с индейскими вождями, сделать его более эффективным, централизованным, европейцы спровоцировали ряд столкновений между множеством разрозненных мелких индейских племён (деревень). В результате внутривидовой борьбы, стимулируемой колонизаторами, выделилось несколько племён, подчинивших себе остальные. Одно из таких племён впоследствии и получило громкое название “империи” Инков. Укрупнение племён происходило до определённой степени безопасной для оккупантов. Вероятность восста-



ния, бунта была небольшой по причине того, что вожди племён вместе со своей свитой и родственниками были вовлечены в тесные отношения с европейцами и оказались сильно от них зависимы.

### 3.5.1. Несколько слов о роли Ватикана

В рассматриваемые времена Римская католическая церковь (РКЦ) не служила одному только Иисусу Христу, а представляла из себя религиозный центр, под сенью которого осуществлялся контроль и руководство всеми существовавшими тогда в Римской империи крупными религиями и верованиями.<sup>21,69</sup> Само слово “католическая” в названии церкви означает “всеобщая”, “всеобъемлющая”, “универсальная”, то есть, объединяющая под своим крылом все зарегистрированные и одобренные ею религии.

Ватикан вообще не волновало конкретное содержание той или иной религии. Главное, чтобы принятая религия обеспечивала социальную стабильность, налоговые поступления и порядок в тех подконтрольных Риму (наследникам Рима после распада Римской империи) регионах мира, где она практиковалась. По мере развития общества содержание мировых религий постоянно корректировалось в нужном направлении для повышения эффективности управления человеческими массами в изменяющихся технологических, экономических и социально-политических условиях.

Прибывая на новые дикие территории, представители ватиканских орденов изучали язык, быт, культуру, социальную структуру, верования, мифы, сказания, легенды, привычки, мировоззрение, космологию, архетип народов, населяющих эти земли. Кроме того, предметом изучения являлась природа региона, полезные ископаемые, климат. Накопив знания о регионе, на базе существующих религиозных представлений племён там проживающих, а также, используя собственные ранее сделанные наработки, для данного региона постепенно создавалась своя собственная “усиленная” местная религия, свой специфический сонм богов, свои особые обряды, свой оригинальный стиль в архитектуре и оформлении храмов и т. п.

По мере интеграции диких народов в современное на тот момент общество сложность обновлённой местной религии и её обрядов постепенно возрастала. Часто процесс эволюции местной религии заканчивался её слиянием с Христианским учением. Происходило это с определёнными оговорками и отклонениями от канонов, принятых в Европе. Отклонения эти учитывали местные традиции и колорит.<sup>70,71</sup> Именно такое слияние можно наблюдать сегодня повсюду в Центральной и Южной Америке, где влияние РКЦ было особенно сильным.<sup>69</sup>

На то, что в Ватикане в те годы не поклонялись одному только Иисусу, в частности, красноречиво указывают надгробия на могилах ни кого-нибудь, а римских пап!<sup>21,69</sup> Христианская символика на могилах римских пап появляется только с начала 19 века. До 19 века на могилах римских пап присутствует символика и образы Ветхого Завета (Иудаизма) и божеств “древнего” Рима. Римские папы вплоть до 19 века не были христианами, они были иудеями и/или язычниками!

Обращает на себя внимание следующий факт: во многих регионах мира существует и часто не один крупный культ, а на огромной территории обоих Америк своя собственная крупная местная религия отличная от Христианской так и не возникла. Обозревая масштабы мегалитического строительства на территории Перу, можно предположить, что здесь для всего региона Южной Америки Ватиканом планировалось создание ещё одной мировой религии, ещё одного мирового религиозного центра. Однако, после многих лет трудов что-то не сложилось, что-то пошло не так.

Возможно, возникли ограничения в средствах; возможно, местный человеческий субстрат оказался неподходящим; возможно, возник устойчивый дефицит продуктов питания; возможно, подвели уровень и подготовка направленных в Перу специалистов самого Ватикана; возможно, изменилась концепция – посчитали, что все религии постепенно следует

сводить к одному христианскому вероучению. Возможно, одновременно сработало несколько вышеперечисленных причин или были ещё какие-то причины нам пока неизвестные. Так или иначе, но решение о прекращении разработки нового вероучения для региона Южной Америки было принято, и проект забросили.

Причастность Ватикана к “проектированию” религий в различных регионах мира легко прослеживается по общим чертам главных действующих лиц мировых религий, по сходным событиям, происходящим с этими лицами. Зачатие героев непорочным способом, демонстрация ими чудес, совершение подвигов, жестокое умерщвление героя и последующее его триумфальное воскрешение из мертвых, вознесение героя на небо (Осирис, Митра, Дионис, Кришна и др.) выдаёт общий источник, общий шаблон, положенный в основу многих мировых религий, который лишь адаптируется к разным местным культурам.<sup>70-72</sup>

### **3.5.2. Доктрина Монро**

Хотя доктрина Монро<sup>73</sup> и была открыто провозглашена только в 1823 г., однако вынашивание тайных планов этой доктрины, частично озвученных пятым президентом США Джеймсом Монро, безусловно, состоялось гораздо раньше. Одна из целей доктрины Монро заключалась в вытеснении Испанской империи<sup>74</sup> с территорий обоих Американских континентов. В соответствии с поставленной целью все достижения испанцев в Северной, Центральной и Южной Америках следовало принижать, а все негативные моменты, связанные с колонизацией, наоборот, преувеличивать. Таким образом, сокрытие реальных исторических событий, включая и сокрытие авторства мегалитических построек с уникальной разновидностью полигональной кладки, оказалось и в интересах РКЦ, и в интересах быстро усиливавшихся в те годы США.

### **3.5.3. В сухом остатке**

Итак, РКЦ стремилась скрыть своё недопустимое с точки зрения современного Христианства участие в поддержке и развитии языческого культа в Перу, а власти США хотели принизить достижения испанских строителей и “назначили” авторами полигональных строений Инков, провозгласив никогда не существовавшую в истории империю Инков. В наши дни полигональные постройки являются национальной гордостью перуанцев. На этих впечатляющих памятниках прошлого воспитано уже не одно молодое поколение коренных индейцев. Поэтому власти Перу никогда не откажутся от этого наследия “своих индейских предков”. Правда не нужна никому.

Возвращаемся к экономике Перу того времени. Через несколько десятков лет интенсивной добычи легкодоступные месторождения золота и серебра иссякли, себестоимость добычи драгметаллов возросла, первоначальные планы Ватикана в отношении развития крупного местного языческого культа на данной территории изменились, и строительство мегалитических комплексов остановилось. К этому моменту власть испанцев и католической церкви как-то “незаметно” усилилась, а численность индейцев каким-то “непостижимым” образом сильно сократилась.<sup>67</sup> Скверное питание и проживание в лачугах не прибавляла здоровья горнякам, места “силы” уже не компенсировали сил, забираемых exhausting работой в рудниках.<sup>67</sup> В общем, наступило время, когда часть заброшенных культовых построек индейцев можно было, наконец, без особых проблем пустить в дело. И эти постройки пошли в дело. Каменные блоки и части построек использовали для возведения католических соборов, монастырей, дворцов, вилл, городских и промышленных зданий.

### **3.6. Крепость Саксайуаман – простейшая крепость-звезда**

Что ещё указывает на европейское авторство перуанских полигональных построек, а также на время, когда они были возведены? Давайте внимательно посмотрим на крепость Саксайуаман (Фото. 21, 22). Что это за постройка? Перед нами – один из ранних вариантов исполнения фортификационного сооружения типа крепости-звезды.<sup>75</sup>



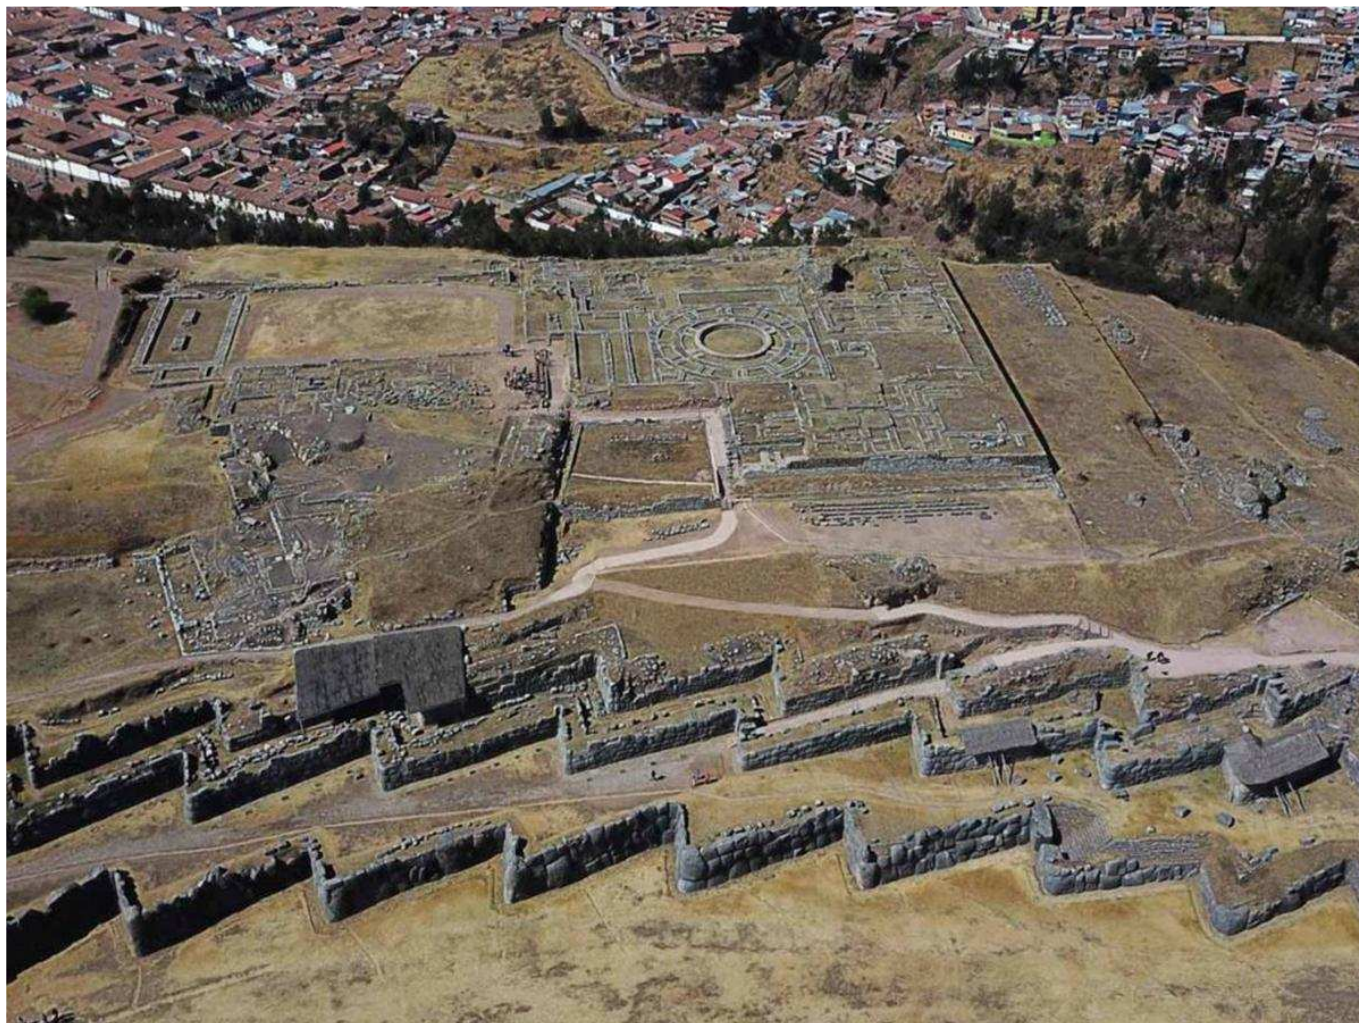

Фото. 21. Крепость Саксайуаман с высоты птичьего полёта ([www.ollantaytambo.org](http://www.ollantaytambo.org)). Хорошо видны три яруса зубчатых бастионов и остатки фундамента цитадели цилиндрической формы.

Крепость Саксайуаман могла играть роль временного хранилища серебряных монет, серебряных и золотых слитков, приготовленных для отправки в Старый Свет; здесь также могла размещаться часть городской казны; в случае опасности крепость служила укрытием для местной власти. Кроме того, в крепости хранились запасы оружия, пороха, провианта и прочее имущество, необходимое для выживания и удержания власти в критический момент.

В отличие от сохранившихся до нашего времени крепостей-звёзд поздней постройки бастионы в Саксайуамане состоят из одного фаса (длинный отрезок стены) и одного фланка (короткий отрезок стены). Цепочка этих бастионов образует зубчатый (звёздчатый) обвод.<sup>75</sup> Куртина (прямой участок крепостной стены) здесь либо отсутствует вообще, либо в виде короткого участка является продолжением фаса. В крепости Саксайуаман имеется три яруса зубчатых бастионов. Так как фасаы непараллельны фронту наступающего неприятеля, а расположены под заметным углом к нему, то от понятия фланка при описании данного типа бастиона можно вообще отказаться и рассматривать бастион, состоящим только из фасаов – длинного и короткого.

Причина наблюдаемой геометрии обвода крепости Саксайуаман заключалась в стремлении строителей крепости максимально упростить подпорную стену, минимизировав число изломов, приходящихся на каждый бастион. Несмотря на сделанное упрощение, возможность обстрела подступов к фасау (и самого этого фаса) бастиона, расположенного справа, и обстрела подступов к фланку (и самого этого фланка) бастиона, расположенного слева, сохраняется. Недостатком данного обвода следует считать невозможность полноценного



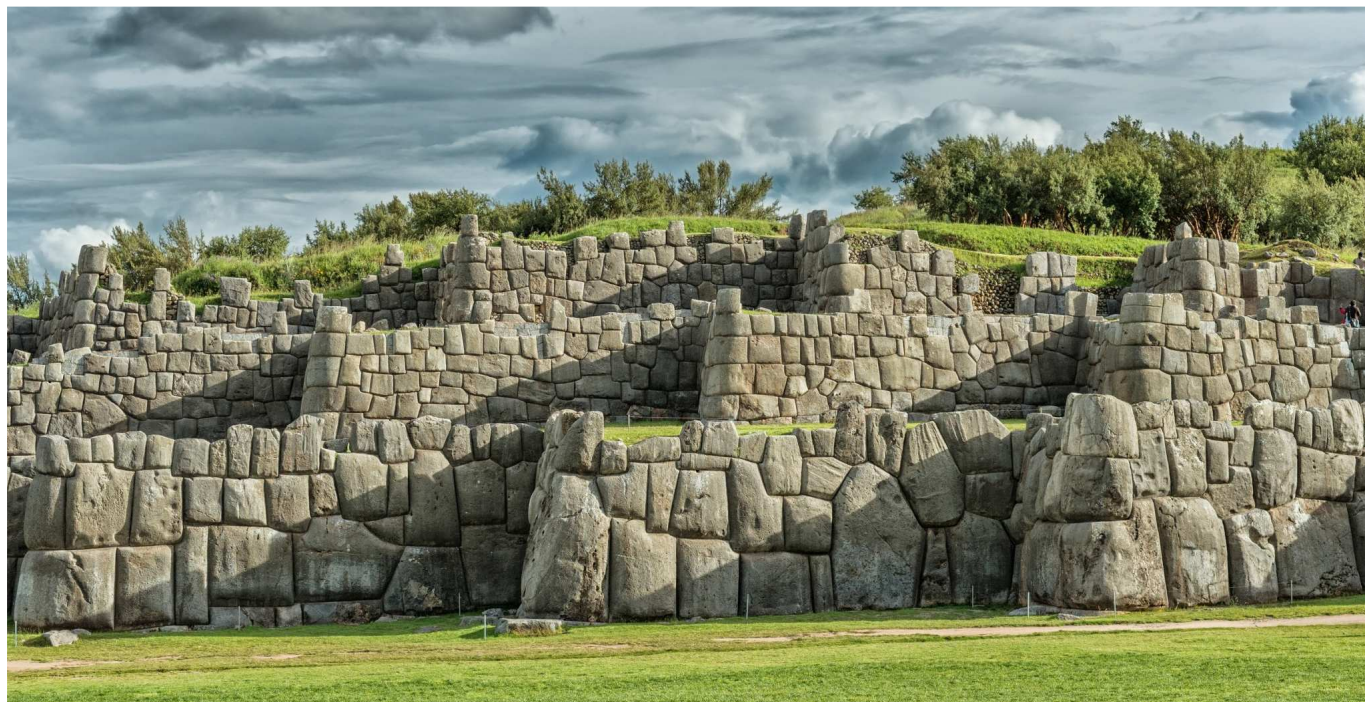

Фото. 22. Расположенные в три яруса зубчатые бастионы крепости Саксайуаман (О. Беликова, dreamstime.com).

перекрёстного обстрела с соседних бастионов противника, находящегося между этими бастионами вблизи крепостной стены или карабкающегося на стену. Тем не менее, наличие стрелка в углу между бастионами позволяет вести огонь вдоль обоих исходящих из этого угла довольно коротких отрезков крепостных стен и, таким образом, частично обеспечить в этих местах возможность перекрёстного огня.

В отличие от типичной крепости-звезды цепочка зубчатых бастионов Саксайуамана, по крайней мере, в своём нынешнем виде не образует замкнутых колец обороны. Тем не менее, как и положено крепости-звезде, внутри неё имелась цитадель. Судя по остаткам фундамента, цитадель представляла собой цилиндрическую башню.

В отличие от типичной крепости-звезды в Саксайуамане не предусматривалось использование пушек. В лучах звезды (бастионах) для них попросту нет места. Применение пушек даже небольшого калибра, а их должно было быть, по меньшей мере, две на каждый бастион (для прикрытия фаса бастиона справа и фланка бастиона слева), потребовало бы значительного увеличения размеров бастионов. Кроме того, самих бастионов должно было быть существенно меньше, так как расстояние между бастионами в случае применения пушек не может быть столь коротким, как в Саксайуамане. Наконец, пушки являются оружием чрезмерно мощным против индейцев, а другой более сильный неприятель на тот момент не ожидался.

Если противник преодолевал первую крепостную стену, по нему открывали огонь защитники крепости, находящиеся во втором эшелоне обороны, а также присоединившиеся к ним уцелевшие защитники из первого эшелона. В случае взятия второго эшелона ситуация повторялась – уцелевшие защитники первой и второй крепостных стен присоединялись к защитникам третьей стены. Каждый следующий эшелон обороны – цепочка зубчатых бастионов, в таких крепостях располагался выше предыдущего, образуя ярусы. В случае сдачи третьего эшелона уцелевшие защитники укрывались в цитадели – последнем рубеже обороны крепости, и обстреливали противника через имеющиеся там амбразуры.

Одним из ключевых параметров звёздчатого обвода является расстояние между вершинами соседних лучей (расстояние между вершиной луча на уровне парапета бастиона и вершиной луча на уровне подножия соседнего бастиона). В Саксайуамане это расстояние



изменяется в диапазоне 10-30 метров, в среднем составляет около 18 метров (оценка относится к нижней границе, так как в расчёт не брались высоты бастионов).<sup>48</sup> Другой важный параметр обвода это то, насколько сильно лучи звезды (бастионы) выдаются наружу, т. е. насколько велика длина лучей. Длины лучей в Саксайуамане в среднем составляют примерно 6 метров.<sup>48</sup> Наконец, третьим параметром крепости, который следует учитывать при анализе, является расстояние между идущими параллельно крепостными стенами (фактически, земляными валами, обложенными камнем). Расстояние между первой и второй стеной составляет в среднем около 8 метров; между второй и третьей – около 3 метров.<sup>48</sup>

Приведённые параметры крепости Саксайуаман однозначно указывают на оружие, которое применялось при её защите. Это оружие должно иметь прицельную дальность стрельбы и поражающую способность на дистанции не менее расстояния между вершинами соседних лучей. Разрывать тела на части и разбрасывать их по окрестностям от такого оружия не требуется, достаточно так покалечить нападающего, чтобы он уже не был в состоянии карабкаться на стену и оказывать активное сопротивление. В случае отхода защитников крепости к вышележащему ярусу используемое оружие должно было в состоянии эффективно поражать противника, захватившего нижележащие ярусы. При укрытии защитников в цитадели, используемое оружие должно оставаться эффективным против противника, осаждающего цитадель.

Одновременно, чтобы оставаться в безопасности оружие защитников крепости должно превосходить по дальности прицельной стрельбы и убийной силе оружие нападающих индейцев – камни, стрелы и копья. Отметим, что испанские солдаты были экипированы в кожаные и металлические доспехи, некоторые из которых с трудом пробивала пуля, выпущенная из кремневого пистолета; индейцы же, напротив, в своей массе никакой защиты на себе не имели. С учётом того, что камни, стрелы и копья приходилось метать вверх – против силы тяжести, то наклонная дальность прицельного метания у индейцев при сохранении убийной силы их оружия составляла порядка 10-15 метров.

Принимая во внимание представленные выше сведения, на роль основного оружия защитников крепости в ближнем бою хорошо подходит мушкетон 17-18 веков (известный как бландербас в Англии или как трабуко в Испании) – короткое гладкоствольное кремневое ружье большого калибра (25-29 мм), стреляющее зарядом картечи.<sup>76</sup> В те времена мушкетон активно использовался в кавалерии, на флоте и при осаде/обороне крепостей.<sup>76</sup> Данный вид стрелкового оружия предназначен для поражения больших масс слабо защищённого противника на малых дистанциях до 30 метров.

Следует отметить, что помимо своих огневых качеств, мушкетон во время выстрела порождал оглушительный (громоподобный, отсюда и название бландербас) звук, яркую вспышку пламени и много порохового дыма, что в совокупности производило дополнительное устрашающее воздействие на индейцев. Также не стоит недооценивать подавляющий, грозный внешний вид самой крепости Саксайуаман, который в совокупности с возможностями огнестрельного оружия внушал индейцам страх и благоговение.

Для уничтожения противника на дальних подступах к крепости использовался мушкет – кремневое ружье с длинным нарезным стволом. Поскольку для успешного отражения нападения на каждом зубчатом бастионе должно располагаться минимум два стрелка, то с учётом числа имеющихся (сохранившихся до наших дней) бастионов (первая стена 20 бастионов, вторая 21, третья 18), гарнизон крепости Саксайуаман должен был состоять не менее чем из 42 солдат.

При строительстве крепости Саксайуаман предполагалось, что основным противником установившегося в Перу режима будут коренные индейцы. В целом вооружённое сопротивление индейцев было подавлено в первые годы завоевания. Тем не менее, восстания периодически вспыхивали, и риск крупного мятежа сохранялся ещё долгие годы. Постепенно индейцы полностью подчинились новой власти и далее вполне мирно сосущество-

вали с испанскими колонизаторами.<sup>23,65-69</sup> Таким образом, спустя некоторое время необходимости в крепости, способной защитить от индейцев, но не способной защитить от более серьёзного противника, имевшего на вооружении ружья и пушки, отпала. Поэтому крепость Саксайуаман, требовавшая средств на своё содержание, была частично разобрана и со временем заброшена.

В заключении следует отметить, что крепость Саксайуаман в сравнении с другими перуанскими памятниками содержит, пожалуй, самое большое число подозрительных блоков, имеющих признаки литья, лепки и оштукатуривания (см. подробнее разделы 1, 2.2, 2.5). Поскольку такие блоки не содержат на себе никаких пометок, и не представлено схемы, где бы указывалось – какие из блоков оригинальные, какие замещают недостающие блоки, а какие подвергались реставрации, то любой из подобных сомнительных блоков данного памятника следует считать подделкой, намеренно вводящей публику в заблуждение относительно древности постройки и способов, применённых при её строительстве.

### **3.7. Феномен “уставших” камней**

Пока без ответа остаётся ряд вопросов, касающихся феномена “уставших” камней. Уставшие камни разбросаны в живописном беспорядке вдоль дороги, ведущей из карьера в крепость Ольянтайтамбо.<sup>6,11</sup> Как уставшие камни смогли пролежать не одну сотню лет на обочине дороги (некоторые прямо на дороге) и даже в черте города и никуда не пропасть? Индейцы не поклонялись каменным параллелепипедам. Вот, если бы в этих параллелепипедах имелись, скажем, ниши, в особенности, трапециевидные, тогда другое дело.

Между тем, в конце обессилившие камни и по сей день с невероятным упорством продолжают указывать нам путь к карьере, где, как считается, добывались блоки для крепости. Почему в горной стране, где камень используется для строительства всего – зданий, мостов, дорог, эти абсолютно выбившиеся из сил камни так удобно расположенные на обочине дороги – бери и используй, никем до сих пор не были расколоты на более мелкие части и не пущены в дело? Большинство из уставших камней колетса в течение одного дня усилиями одного опытного каменщика. Но, нет, мы видим полную сохранность и неуязвимость этих камней. Получается, что местные власти на протяжении всех этих сотен лет почему-то строго следили за тем, чтобы данные каменные блоки никто не трогал.

Удивительно, но феномен “уставших” камней встречается не только в Южной Америке. Так, например, в Африке имеется “уставший” Асуанский обелиск,<sup>77</sup> а на Ближнем Востоке – всем известные не менее “уставшие” Баальбекские параллелепипеды.<sup>78</sup> На протяжении сотен лет на территориях, где расположены эти памятники, возникали и распадались империи, велись опустошительные войны, на место одних народов приходили другие, но, как и в Перу, мы снова видим поразительную сохранность этих измождённых и в конце обессиливших каменных мегалитов. Подобная сохранность, безусловно, невозможна без участия местных властей. Значит, какие-то силы всё это время принуждали местные власти следить за тем, чтобы с этими артефактами прошлого ничего не случилось.

### **3.8. Изготовление с помощью 3D-пантографа симметричных статуй**

Способ литья, при котором вначале отливается болванка (цельная или полая) из дешёвого бетона,<sup>37</sup> а затем после окончания её усадки поверх отливается сравнительно тонкая оболочка (слой “штукатурки”) из более дорого искусственного гранита (см. раздел 2.2), из-за своей сложности не подходит для масштабного полигонального строительства, в котором все каменные блоки разные. Между тем, данный способ отлично подходит как для изготовления одиночных уникальных статуй, так и для массового изготовления одинаковых статуй. Отметим, что в качестве бетона для болванки и внешней оболочки, также могли использоваться геополимерные бетоны,<sup>38</sup> соответствующих составов.

Например, некоторые “древнеегипетские” статуи фараонов и сфинксов, покрытые слоем штукатурки из искусственного камня (гранит, долерит), по всей видимости, были изготовлены по такой технологии.<sup>39, 44</sup> Поскольку среди некоторых “древнеегипетских” статуй



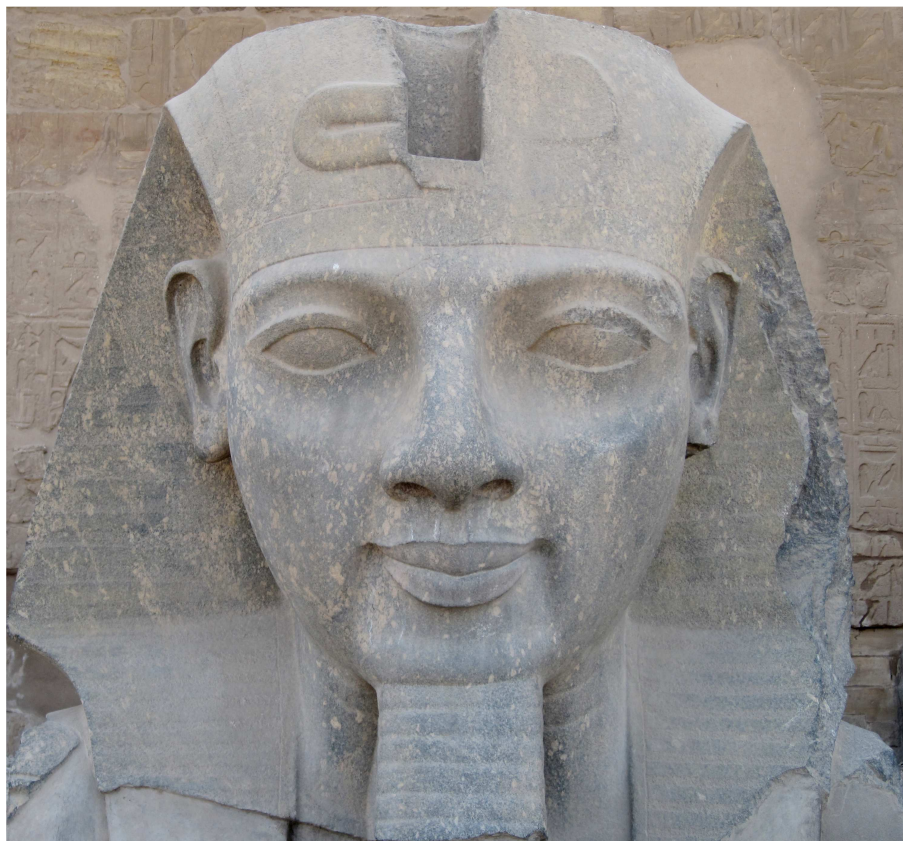

Фото. 23. Бюст фараона Рамзеса II в Луксоре, Египет (2011, [wikimedia.org](https://commons.wikimedia.org/wiki/File:Sphinx_of_Giza)). Обращает на себя внимание симметричность скульптуры.

встречаются статуи, отличающиеся только размерами, то можно предположить, что и эти статуи создавались по одной и той же исходной модели с использованием 3D-пантографа, настраиваемого на разные коэффициенты увеличения.

Ряд исследователей давно обратили внимание на достаточно совершенную симметрию (лицо, головной убор, торс) некоторых египетских статуй (Рамзес II, Аменхотеп III, Нефертити), см. Фото. 23.<sup>79</sup> Вопрос о том, как эта симметрия была достигнута, долгое время оставался открытым. Между тем, небольшая модификация механизма пантографа позволяет изготавливать статуи с высокой степенью симметрии левой и правой сторон.<sup>44</sup> Покажем, как это достигалось на практике.

Вначале, как обычно, по уменьшенной глиняной модели с помощью пантографа скульптор создаёт увеличенную глиняную модель.<sup>26,27</sup> После этого 0-образная цепь в пантографе заменяется на 8-образную. В результате данной модификации платформа с уменьшенной моделью статуи и платформа с увеличенной моделью статуи будут вращаться во взаимно противоположных направлениях. Если используется пантограф, в котором для привода платформ вместо цепи применяется промежуточное зубчатое колесо<sup>59</sup> (в общем случае нечётное число одинаковых промежуточных зубчатых колёс), то вместо этого колеса следует установить пару одинаковых промежуточных зубчатых колёс (в общем случае чётное число одинаковых промежуточных зубчатых колёс) или вообще исключить любые промежуточные колёса.

Теперь скульптор, основываясь на художественных достоинствах левой и правой половин уменьшенной модели статуи, должен решить, какую из сторон статуи он хочет в точности скопировать на другую её сторону. Определившись со стороной, пусть для определённости это будет левая сторона, скульптор прикладывает щуп к левой стороне уменьшенной модели. Тогда, указатель пантографа покажет в пространстве соответствующую точку на правой стороне увеличенной модели. Если в указываемой точке имеется избыток глины, то он убирается непосредственно указателем пантографа; если недостаток, то необходимое количество глины скульптор в эту точку добавляет.

При касании модели щупом пантографа щуп следует направлять так, чтобы проходящая вдоль него прямая пересекала вертикальную ось поворотной платформы модели (Table A на Рис. 2) под углом  $90^\circ$ . Для того чтобы пользоваться пантографом при направлениях щупа отличных от указанного (общий случай касания поверхности модели под произвольным углом), параллелограммный механизм следует заменить на антипараллелограммный<sup>24</sup> механизм. Для этого длинные рейки параллелограмма всего лишь нужно переместить на место диагоналей параллелограмма.

Таким образом, с помощью модифицированного пантографа можно получить скульптуру, левые и правые половины которой обладают высокой симметрией. Отклонения от симметрии в такой скульптуре определяются погрешностью работы механизма пантографа и погрешностями применяемой технологии изготовления (суммарная погрешность в зависимости от размеров скульптуры лежит в диапазоне от нескольких до десятка миллиметров). Для уменьшения влияния погрешности пантографа работу по симметризации, например, головы следует начинать с кончика носа, где погрешность будет нулевая, и заканчивать на затылке, где погрешность окажется наибольшей, но наименее заметной.

Отметим, что постепенное увеличение нарушения симметрии от носа к затылку будет являться признаком использования технологии, базирующейся на применении 3D-пантографа. Для выявления такого нарушения лучше всего использовать координатно-измерительную машину (КИМ),<sup>80</sup> погрешность которой много меньше погрешности 3D-пантографа (в зависимости от размеров измеряемого тела погрешность КИМ лежит в диапазоне от единиц до сотен микрон).

Существует несколько полигональных построек, в которых имеются короткие участки кладки с симметричным расположением блоков (Саксайуаман, Ольянтайтамбо). Однако, симметричность на этих участках только приблизительная (см. пример на Фото. 11). Блоки с левой и с правой стороны от вертикальной оси симметрии не являются полностью зеркально-симметричными, они отличаются и по форме, и по размерам. Таким образом, обеспечиваемая 3D-пантографом техническая возможность создания полигональных кладок со строго зеркально-симметричными участками строителям полигональных комплексов либо была на тот момент неизвестна, либо просто не использовалась.

## 4. Обсуждение

Среди материалов по теме следует отметить работу 16, автор которой предложил использовать уменьшенную гипсовую модель каменного блока, а перенос сложной геометрии поверхности и её масштабирование выполнять по нескольким опорным точкам с помощью кронциркуля. Гипсовая модель, обычно требуется для того, чтобы при изготовлении копий не изнашивать оригинальную модель из глины. При изготовлении блоков для полигональной кладки такой проблемы не возникает. Более того, при изготовлении модели блока по каменной заготовке произвольной формы, глиняная модель служит один раз и затем выбрасывается (или служит болванкой для новой модели). Таким образом, для достижения требуемого результата вполне достаточно только глиняной модели блока.

Сам процесс переноса сложной геометрии модели и её масштабирование по немногим опорным точкам с помощью кронциркуля очень трудоёмкий и неточный. Однако этот процесс перестаёт быть таковым, если вместо кронциркуля используется 3D-пантограф. Анализ показывает, что в большинстве случаев сначала по каменной заготовке произвольной формы с помощью 3D-пантографа создавалась её уменьшенная глиняная модель. Затем в глиняной модели блока вырезались места под сопряжения с соседними блоками. После чего из модельных блоков собиралась модельная стена. После сушки стена разбиралась, и места сопряжения модельных блоков с помощью 3D-пантографа переносились на свои каменные заготовки.

В техническом отношении транслятор рельефа по своей сложности сравним с 2D-пантографом, создание которого относят к началу 17 века. Знания, накопленные в облас-



ти механики, и уровень технологии, достигнутые к началу 18 века, вполне позволяли в то время сконструировать и построить 3D-пантограф, пригодный для нужд строительства. Таким образом, наиболее сложные полигональные кладки, получаемые по глиняным моделям с помощью 3D-пантографа, следует датировать началом 18 века, а более простые, получаемые с помощью транслятора рельефа, – началом 17 века.

Крепость Саксайуаман построена испанцами не ранее 17 века, поскольку сам её вид и принятая в те времена концепция обороны, тесно связанная с имеющимся на тот момент стрелковым вооружением, прямо указывают на это. Не ранее как началом 18 века следует датировать полигональные барельефы и полигональные гигантские Лица-башни камбоджийского храмового комплекса Ангкор, а также ряд известных своей симметрией и гигантскими размерами “древнеегипетских” статуй, поскольку для создания всех этих памятников был необходим 3D-пантограф.

## Фотографии

На фотографиях представлены полигональные кладки, которые могут быть получены с помощью предложенных в статье способов. Отличительные черты этих кладок: каменные блоки большие весом от нескольких сотен килограмм до нескольких тонн, блоки сопрягаются друг с другом вплотную без зазора через сложные криволинейные, протяжённые поверхности.

## Благодарности

Автор выражает благодарность О. В. Объедкову, профессору И. К. Фоменко, О. Э. Ляпину, к. т. н. В. М. Сороке и Д. В. Писаренко за критическое прочтение рукописи, помощь и поддержку, оказанные при выполнении данного исследования.

## Материалы по теме

1. [“Полигональная кладка”](#), Википедия.
2. [“Землетрясения в Перу”](#), Википедия.
3. C. Cuadra, [“Dynamic characteristics of Inca’s stone masonry”](#), ch. 15, pp. 421-460 in book [“Masonry construction in active seismic regions”](#) (series in civil and structural engineering), edited by R. Rupakhety, D. Gautam, 466 pp., Woodhead Publishing, 2021.
4. M. A. Rodríguez-Pascua, C. Benavente Escobar, L. Rosell Guevara, C. Grützner, L. Audin, R. Walker, B. García, E. Aguirre, [“Did earthquakes strike Machu Picchu?”](#), Journal of Seismology, vol. 24, pp. 883-895, 2020.
5. K-G. Hinzen, A. Montabert, [“Rectangular blocks vs polygonal walls in archaeoseismology”](#), Annals of Geophysics, vol. 60, no. 4. pp. S0443-0460, 2017.
6. J.-P. Protzen, [“Inca quarrying and stonecutting”](#), Journal of the Society of Architectural Historians, vol. 44, no. 2, pp. 161-182, 1985.
7. E. Laroze, A. Garric, [“La technique du sciage des joints dans la maçonnerie ptolémaïque en grès”](#), Bulletin de l'Institut Français d'Archéologie Orientale (BIFAO), vol. 113, pp. 239-282, 2013 (на французском).
8. [“Polygonal wall”](#) in [Delphi](#), Greece, Wikipedia.
9. B. Clifford, W. McGee, M. Muhonen, [“Recovering cannibalism in architecture with a return to cyclopean masonry”](#), Nexus Network Journal, vol. 20, pp. 583-604, 2018.
10. O. J. Outwater, [“Building the fortress of Ollantaytambo”](#), Archaeology, vol. 12, no. 1, pp. 26-32, 1959.
11. J.-P. Protzen, [“Inca architecture and construction at Ollantaytambo”](#), Oxford University Press, 303 pp., New York, Oxford, 1993.
12. V. R. Lee, [“The building of Sacsahuaman”](#), Journal of Andean Archaeology (Ñawpa Pacha), vol. 24, iss. 1, pp. 49-60, 1986.
13. Е. М. Шилин, [“Полигональная кладка в Перу в Южной Америке – частный взгляд архитектора”](#), Проекты-кирпичных-домов.рф.
14. Александр, [“Полигональная кладка: дачные технологии”](#), YouTube, 2015.

15. Александр, [“Полигональная кладка: дачные технологии II”](#), YouTube, 2016.
16. Разгадки истории, [“Как делали полигональную кладку?”](#), YouTube, 2019.
17. Александр Таманский, [“Мегалиты инков, полигональная кладка и ложь историков”](#), YouTube, 2021.
18. [“Pantograph”](#), Wikipedia.
19. GRESAR, [“Следы чужих технологий”](#), серии 1-10, YouTube, 2019-2021.
20. [“Террасное земледелие”](#), Википедия.
21. А. Таманский, [“Другая история Римской империи”](#), второе издание, 400 стр., 2020.
22. Александр Таманский, [“Когда появились города?”](#), YouTube, 2021.
23. Александр Таманский, [“Римские дороги доколумбовой Америки”](#), YouTube, 2021.
24. И. И. Артоболевский, [“Механизмы в современной технике: Справочное пособие для инженеров, конструкторов и изобретателей”](#), том 1, издание второе, переработанное, Наука, Москва, 1979.
25. M. Rogińska-Nieśluchowska, [“The pantograph and its geometric transformations – a former popular tool for copying and scaling”](#), The Journal of Polish Society for Geometry and Engineering Graphics, vol. 29, pp. 59-65, 2016.
26. Michael Keropian, [“3D Pantograph enlarging”](#), parts 1-7, YouTube, 2018.
27. Michael Keropian, [“Enlarging and reducing sculpture, 3D pantograph”](#), Michael Keropian Sculpture.
28. [“Блок \(механика\)”](#), Википедия.
29. [“Полиспаст”](#), Википедия.
30. [“Лебёдка”](#), Википедия.
31. [“Грузоподъёмный кран”](#), Википедия.
32. SGD Sacred Geometry Decoded, [“How the ancients could move & place megaliths with primitive tech”](#), YouTube, 2022.
33. SGD Sacred Geometry Decoded, [“Coral Castle explained & the mystery making methodology explained”](#), YouTube, 2022.
34. SGD Sacred Geometry Decoded, [“How to precisely steer a megalith with primitive technology”](#), YouTube, 2022.
35. SGD Sacred Geometry Decoded, [“Ancient cranes are modern cranes gears plus compound pulleys”](#), YouTube, 2020.
36. D. Schilling, [“Spiezer chronik”](#), p. 755, Manuscript, 806 pp., 15th century (Burgerbibliothek, Mss. Hist. Helv. I16, Bern, на немецком).
37. Г. И. Горчаков, Ю. М. Баженов, [“Строительные материалы”](#), 688 стр., Стройиздат, Москва, 1986.
38. J. Davidovits, F. Davidovits, [“The pyramids. An enigma solved”](#), 427pp., 2-nd edition, [Geopolymer Institute](#), Saint-Quentin, 2001.
39. Таманский International, [“Когда закончился Древний или Классический Египет?”](#), YouTube, 2022.
40. Таманский International, [“Непостижимые технологии и скорость строительства гранитных набережных Санкт-Петербурга”](#), YouTube, 2022.
41. Таманский International, [“Уникальные и никогда более не повторённые гранитные технологии Санкт-Петербурга”](#), YouTube, 2022.
42. Таманский International, [“Секрет искусственного гранита Санкт-Петербурга практически разгадан”](#), YouTube, 2022.
43. [“Коэффициент теплового расширения”](#), Википедия.
44. Р. В. Лапшин, “Как неизвестный скульптор смог добиться достаточно совершенной симметрии лица египетского фараона Рамзеса II?” (готовится к публикации).
45. D. Ogburn, B. Sillar, J. C. Sierra, [“Evaluating effects of chemical weathering and surface contamination on the in situ provenance analysis of building stones in the Cuzco region of Peru with portable XRF”](#), Journal of Archaeological Science, vol. 40, pp. 1823-1837, 2013.
46. Председатель СНТ, [“Кто на самом деле строил Кронштадт?”](#), YouTube, 2019.
47. [“Angkor”](#), Википедия.



48. J.-P. Protzen, "[The fortress of Saqsa Waman: was it ever finished?](#)", Journal of Andean Archaeology (Ñawpa Pacha), vol. 25, iss. 1, pp. 155-175, 1987.
49. "[Климат Перу](#)", Википедия.
50. "[Non-contact profilometers](#)", Wikipedia.
51. "[Кристоф Шейнер](#)", Википедия.
52. C. Scheiner, "[Pantographice seu ars delineandi res quaslibet per parallelogrammum lineare seu cavum, mechanicum, mobile](#)", 108 pp., Typographia Ludouici Grignani, Rome, 1631 (на латыни).
53. "[Андрей Константинович Нартов](#)", Википедия.
54. "[Токарно-копировальный медальерный станок](#)", Государственный Эрмитаж, Санкт-Петербург.
55. В. В. Данилевский, "[Нартов и "Ясное зрелище машин"](#)", под редакцией А. С. Бриткина, 271 стр., Машгиз, Москва, Ленинград, 1958.
56. "[Джеймс Уатт](#)", Википедия.
57. "[Reducing sculpture copying machine](#)", Science Museum, London.
58. J. P. Muirhead, "[The life of James Watt, with selections from his correspondence](#)", pp. 454-466, 2nd revised edition, 572 pp., John Murray, London, 1859.
59. "[Machine for reproducing sculpture](#)", Science Museum, London.
60. "[John I. Hawkins](#)", Wikipedia.
61. T. Gauthier, "[Photosculpture](#)", Le Monde illustré, pp. 396-398, December 17, 1864 (на французском).
62. Александр Таманский, "[Кто и когда построил египетские пирамиды?](#)", YouTube, 2020.
63. Александр Таманский, "[Как построили египетские пирамиды?](#)", YouTube, 2021.
64. Александр Таманский, "[Кто построил американские пирамиды?](#)", YouTube, 2021.
65. Александр Таманский, "[Американское серебро в римских монетах](#)", YouTube, 2021.
66. "[Global silver trade from the 16th to 19th centuries](#)", Wikipedia.
67. P. Bakewell, "[Miners of the Red Mountain: Indian labor in Potosí, 1545-1650](#)", 213 pp., University of New Mexico Press, Albuquerque, 1984.
68. J. J. TePaske, "[A new world of gold and silver](#)", edited by K. W. Brown, 340 pp., Brill, Leiden, Boston, 2010.
69. Таманский International, "[Языческий католицизм Латинской Америки](#)", YouTube, 2022.
70. Н. А. Морозов, "[Христос – История человеческой культуры в естественно-научном освещении](#)", том 4, 816 стр., Государственное издательство, Москва – Петроград, 1928.
71. Н. А. Морозов, "[Азиатские Христы – История человеческой культуры в естественно-научном освещении](#)", том 9, 580 стр., Крафт+, Москва, 2003.
72. Г. В. Носовский, А. Т. Фоменко, "[Новая Хронология Египта – Астрономическое датирование памятников Древнего Египта – Исследования 2000-2002 годов](#)", 560 стр., АСТ, Москва, 2007.
73. "[Доктрина Монро](#)", Википедия.
74. "[Испанская империя](#)", Википедия.
75. "[Fortification and siegecraft](#)", The Encyclopædia Britannica. A dictionary of arts, sciences, literature and general information, vol. X, p. 686, fig. 15, 11th edition, University Press, New York, 1910.
76. Л. К. Маковская, "[Ручное огнестрельное оружие Русской Армии конца XIV-XVIII веков](#)", 219 стр., Воениздат, Москва, 1992.
77. "[Незаконченный обелиск](#)", Википедия.
78. "[Южный камень](#)", Википедия.
79. C. Dunn, "[Lost technologies of ancient Egypt: advanced engineering in the temples of the pharaohs](#)", 400 pp., Bear & Company, 2010.
80. "[Координатно-измерительная машина](#)", Википедия.
